# Single cell, whole embryo phenotyping of pleiotropic disorders of mammalian development

Xingfan Huang<sup>1,2\*</sup>, Jana Henck<sup>3,4\*</sup>, Chengxiang Qiu<sup>1\*</sup>, Varun K. A. Sreenivasan<sup>3</sup>, Saranya Balachandran<sup>3</sup>, Rose Behncke<sup>5</sup>, Wing-Lee Chan<sup>5</sup>, Alexandra Despang<sup>4,6</sup>, Diane E. Dickel<sup>7</sup>, Natja Haag<sup>8</sup>, Rene Hägerling<sup>5</sup>, Nils Hansmeier<sup>5</sup>, Friederike Hennig<sup>4</sup>, Cooper Marshall<sup>1,9</sup>, Sudha Rajderkar<sup>7</sup>, Alessa Ringel<sup>4</sup>, Michael Robson<sup>4</sup>, Lauren Saunders<sup>1</sup>, Sanjay R. Srivatsan<sup>1</sup>, Sascha Ulferts<sup>5</sup>, Lars Wittler<sup>4</sup>, Yiwon Zhu<sup>7</sup>, Vera M. Kalscheuer<sup>4</sup>, Daniel Ibrahim<sup>4,6</sup>, Ingo Kurth<sup>8</sup>, Uwe Kornak<sup>10</sup>, David R. Beier<sup>11</sup>, Axel Visel<sup>7</sup>, Len A. Pennacchio<sup>7</sup>, Cole Trapnell<sup>1</sup>, Junyue Cao<sup>12#</sup>, Jay Shendure<sup>1,9,13,14#</sup>, Malte Spielmann<sup>3,4,15#</sup>

- 1 Department of Genome Sciences, University of Washington, Seattle, WA 98195, USA
- 2 Paul G. Allen School of Computer Science & Engineering, University of Washington, Seattle, WA 98195, USA
- 3 Institute of Human Genetics, University Medical Center Schleswig-Holstein, University of Lübeck & Kiel University, Lübeck, Germany
- 4 Max Planck Institute for Molecular Genetics, Berlin, Germany
- 5 Institute of Medical Genetics and Human Genetics of the Charité, Berlin, Germany
- 6 Berlin Institute of Health at Charité – Universitätsmedizin Berlin, BCRT
- 7 Lawrence Berkeley National Laboratory, Berkeley, CA, USA
- 8 Institute of Human Genetics, Medical Faculty, RWTH Aachen University, Aachen, Germany
- 9 Brotman Baty Institute for Precision Medicine, University of Washington, Seattle, WA 98195, USA
- 10 Institute of Human Genetics, University Medical Center Göttingen, Göttingen, Germany
- 11 Center for Developmental Biology & Regenerative Medicine, Seattle Children's Research Institute, Seattle, WA, USA
- 12 Laboratory of Single-cell genomics and Population dynamics, The Rockefeller University, New York, NY 10065, USA
- 13 Howard Hughes Medical Institute, Seattle, WA 98195, USA
- 14 Allen Discovery Center for Cell Lineage Tracing, Seattle, WA 98195, USA
- 15 DZHK (German Centre for Cardiovascular Research), partner site Hamburg/ Lübeck/Kiel, Lübeck, Germany

\* These authors contributed equally: Xingfan Huang, Jana Henck, Chengxiang Qiu

# Corresponding authors: Junyue Cao, Jay Shendure, Malte Spielmann

## Abstract

Mouse models are a critical tool for studying human diseases, particularly developmental disorders, as well as for advancing our general understanding of mammalian biology. However, it has long been suspected that conventional approaches for phenotyping are insufficiently sensitive to detect subtle defects throughout the developing mouse. Here we set out to establish single cell RNA sequencing (sc-RNA-seq) of the whole embryo as a scalable platform for the systematic molecular and cellular phenotyping of mouse genetic models. We applied combinatorial indexing-based sc-RNA-seq to profile 101 embryos of 26 genotypes at embryonic stage E13.5, altogether profiling gene expression in over 1.6M nuclei. The 26 genotypes include 22 mouse mutants representing a range of anticipated severities, from established multisystem disorders to deletions of individual enhancers, as well as the 4 wildtype backgrounds on which these mutants reside. We developed and applied several analytical frameworks for detecting

48 differences in composition and/or gene expression across 52 cell types or trajectories. Some  
49 mutants exhibited changes in dozens of trajectories (*e.g.*, the pleiotropic consequences of altering  
50 the *Sox9* regulatory landscape) whereas others showed phenotypes affecting specific subsets of  
51 cells. We also identify differences between widely used wildtype strains, compare phenotyping  
52 of gain vs. loss of function mutants, and characterise deletions of topological associating domain  
53 (TAD) boundaries. Intriguingly, even among these 22 mutants, some changes are shared by  
54 heretofore unrelated models, suggesting that developmental pleiotropy might be “decomposable”  
55 through further scaling of this approach. Overall, our findings show how single cell profiling of  
56 whole embryos can enable the systematic molecular and cellular phenotypic characterization of  
57 mouse mutants with unprecedented breadth and resolution.

58

## 59 Introduction

60

61 For over 100 years, the laboratory mouse (*Mus musculus*) has served as the quintessential animal  
62 model for studying both common and rare human diseases<sup>1-4</sup>. For developmental disorders in  
63 particular, mice have been transformative, as a mammalian system that is nearly ideal for genetic  
64 analysis and in which the embryo is readily accessible<sup>5</sup>.

65

66 In the first decades of the field, mouse genetics relied on spontaneous or induced mutations  
67 resulting in visible physical defects that could then be mapped. However, gene-targeting  
68 techniques subsequently paved the way for “reverse genetics”, *i.e.* analysing the phenotypic  
69 effects of intentionally engineered mutations. Through systematic efforts such as the International  
70 Knockout Mouse Consortium, knockout models are now available for thousands of genes<sup>6</sup>.  
71 Furthermore, with the emergence of CRISPR/Cas genome editing<sup>7,8</sup>, it is increasingly practical to  
72 delete individual regulatory elements or otherwise modify the *cis*-regulatory landscape, and to  
73 then study the *in vivo* consequences of these alterations<sup>9,10</sup>.

74

75 Phenotyping has also grown more sophisticated. Conventional investigations of developmental  
76 syndromes typically focus on one organ system at a specific stage of development, *e.g.* combining  
77 expression analyses, histology, and imaging to investigate a visible malformation<sup>1,11,12</sup>. However,  
78 pleiotropy is a pervasive phenomenon in mammalian development, and focusing on one aspect  
79 of a phenotype may come at the expense of detecting or characterising others, particularly if they  
80 are subtle or masked by lethality. The concept of the Mouse Clinic, in which a given model is  
81 subjected to a battery of standardised tests, reflects a more systematic approach<sup>13</sup>. However,  
82 such clinics are expensive and time-consuming to conduct in practice. Furthermore, many kinds  
83 of phenotypes detected through such tests (*e.g.*, behavioural, electrophysiological) may require  
84 years of additional work to link to their molecular and cellular correlates. It is also the case that  
85 knockouts of even highly conserved coding or regulatory sequences frequently result in no  
86 detectable abnormality or only minor transcriptional changes<sup>14-16</sup>. In such instances, it remains  
87 unknown whether there is truly no phenotype, or whether the methods used are simply  
88 insufficiently sensitive. In sum, phenotyping has become “rate limiting” in mouse genetics.

89

90 The recent emergence of single cell molecular profiling technologies (*e.g.*, sc-RNA-seq) offer a  
91 potential path to overcome this barrier. As a first step, we and others have extensively applied sc-  
92 RNA-seq to profile wildtype mouse development at the scale of the whole embryo<sup>17-22</sup>. Applying  
93 sc-RNA-seq to mouse mutants, several groups have successfully unravelled how specific  
94 mutations affect transcriptional networks and lead to altered cell fate decisions in individual  
95 organs<sup>23-26</sup>. However, there is still no clear framework for analysing such data at the scale of the  
96 whole embryo, nor for how such data from multiple mutants might be combined to better  
97 understand the molecular and cellular basis of classic phenomena like pleiotropy.

98

99 Here we set out to establish sc-RNA-seq of whole embryos as a scalable framework for the  
100 systematic molecular and cellular phenotyping of mouse genetic models. We profiled 101  
101 embryos of 22 different mouse mutants and 4 wildtype backgrounds at E13.5. The resulting  
102 mouse mutant cell atlas (MMCA) includes over 1.6M sc-RNA-seq profiles. To analyze these data,

103 we develop and apply new strategies for detecting differences in composition and/or gene  
104 expression across 52 cell types or trajectories spanning the whole mid-gestational embryo.

105

### 106 Single-cell RNA-seq of 101 mouse embryos

107

108 We collected a total of 103 mouse embryos, including 22 different mutants and four wildtype (WT)  
109 strains (C57BL/6J, G4, FVB, and BALB/C) at embryonic stage E13.5, and generally four  
110 replicates per strain (**Fig. 1a**). The mouse mutants were chosen to represent a spectrum of  
111 phenotypes ranging from very severe pleiotropic developmental disorders (e.g., *Sox9*, which we  
112 expected to affect many organ systems) to knockouts of individual, noncoding regulatory  
113 elements (many of which we expected to result in, at best, subtle defects).

114

115 We grouped the 22 mutants, all homozygous, into four rough categories (**Supplementary Table**  
116 **1**): 1) pleiotropic mutants, representing knockouts of developmental genes expressed in multiple  
117 organs (*Ttc21b* KO, *Carm1* KO, *Gli2* KO), as well as two mutations of the *Sox9* regulatory  
118 landscape suspected to have pleiotropic effects, both of which effectively result in the introduction  
119 of a boundary element between endogenous *Sox9* enhancers and the *Sox9* promoter (*Sox9* TAD  
120 boundary KI; *Sox9* regulatory INV)<sup>27–30</sup>. 2) developmental disorder mutants, intended to model  
121 specific human diseases (*Scn11a* GOF, *Ror2* KI, *Gorab* KO, *Cdkl5* -Y)<sup>31–33</sup>, 3) mutations of loci  
122 associated with human disease (*Scn10a/Scn11a* DKO, *Atp6v0a2* KO, *Atp6v0a2* R755Q,  
123 *Fat1TAD* KO)<sup>34,35</sup>. 4) prospective deletions of cis-regulatory elements, including of TAD  
124 boundaries in the vicinity of developmental transcription factors including *Smad3*, *Twist1*, *Tbx5*,  
125 *Neurog2*, *Sim1*, *Smad7*, *Dmrt1*, *Tbx3*, and *Twist1*<sup>36</sup>, and, as a positive control, the ZRS distal  
126 enhancer (Zone of polarizing activity Regulatory Sequences) which regulates sonic hedgehog  
127 (SHH) expression and results in absent distal limb structures<sup>37</sup>.

128

129 The 103 flash-frozen embryos (26 genotypes x 4 replicates; one embryo was lost in transport), all  
130 staged at E13.5, were sent by five groups to a single site, where they were subjected to sci-RNA-  
131 seq3 as previously described<sup>17</sup>. After removing potential doublets, we profiled 1,671,245 nuclei  
132 altogether (16,226 +/- 9,289 per embryo; 64,279 +/- 18,530 per strain; median UMI count of 843  
133 per cell and median genes detected of 534 at 75% duplication rate).

134

135 Applying principal components analysis (PCA) to “pseudobulk” profiles of the 103 embryos  
136 resulted in two roughly clustered groups corresponding to genetic background (**Fig. 1b**). In  
137 particular, wildtype and mutant FVB embryos clustered separately from C57BL/6J, G4, and  
138 BALB/C embryos. However, embryos corresponding to individual mutants did not cluster  
139 separately, suggesting that none were affected with severe, global aberrations and highlighting  
140 the inadequacy of bulk RNA-seq for detecting mutant-specific effects. A single outlier embryo  
141 (#104) was aberrant with respect to cell recovery (n = 1,047) as well as appearance  
142 (**Supplementary Fig. 1**).

143

144 We next sought to validate the staging of these embryos, leveraging our previous mouse  
145 organogenesis cell atlas (MOCA), which spans E9.5 to E13.5<sup>17</sup>. PCA of pseudobulk profiles of 61  
146 wildtype embryos from MOCA resulted in a first component (PC1) that was strongly correlated



147 with developmental age (**Fig. 1c**). Projecting pseudobulk profiles of the 103 MMCA embryos to  
148 this embedding resulted in the vast majority of MMCA embryos clustering with E13.5 embryos  
149 from MOCA along PC1, consistent with accurate staging. However, five embryos from MMCA  
150 appeared closer to E11.5 or E12.5 embryos from MOCA. Four of these were retained as their  
151 delay might be explained by their mutant genotype, while one from a wildtype background  
152 (C57BL/6; #41) was designated as a second outlier. We removed cells from the two outlier  
153 embryos (#104; #41) as well as cells with high proportions of reads mapping to the mitochondrial  
154 genome (>10%) or ribosomal genes (>5%). This left 1,627,857 cells, derived from 101 embryos  
155 (**Fig. 1d**).

156

157 To facilitate an integrated analysis, we sought to project cells from all genotypes to a wildtype  
158 derived “reference embedding” (**Supplementary Fig. 2; Methods**). We first applied principal  
159 components (PC) dimensionality reduction to cells from wildtype genotypes only ( $n = 215,575$ ;  
160 13.2% of dataset). We then projected cells from mutant genotypes to this embedding, followed  
161 by alignment on the combined data to mitigate the effects of technical factors. Next, we applied  
162 the UMAP algorithm to the aligned principal components of wildtype cells, followed by Louvain  
163 clustering and manual annotation of the resulting major trajectories and sub-trajectories based on  
164 marker gene expression. Finally, we projected mutant cells into this UMAP space and assigned  
165 them major trajectory and sub-trajectory labels via a  $k$ -nearest neighbour ( $k$ -NN) heuristic.

166

167 Altogether, we identified 13 major trajectories, 8 of which could be further stratified into 59 sub-  
168 trajectories (**Fig. 1e; Supplementary Fig. 3; Supplementary Table 2**). These were generally  
169 consistent with our annotations of MOCA, albeit with some corrections as we have described  
170 elsewhere<sup>38,39</sup>, as well as greater granularity for some cell types that is likely a consequence of  
171 the deeper sampling of E13.5 cells in these new data (**Fig. 1f; Supplementary Fig. 4**). For  
172 example, what we had previously annotated as the excitatory neuron trajectory could be further  
173 stratified into a di/mesencephalon (*Slc17a6+*, *Barhl1+*, *Shox2+*), thalamus (*Ntng1+*, *Gbx2+*)  
174 and spinal cord (*Ebf1+*, *Ebf3+*) sub-trajectories, while skeletal muscle could be further  
175 stratified into myoblast (*Pax7+*) and myotube (*Myh3+*, *Myog+*) sub-trajectories.

176

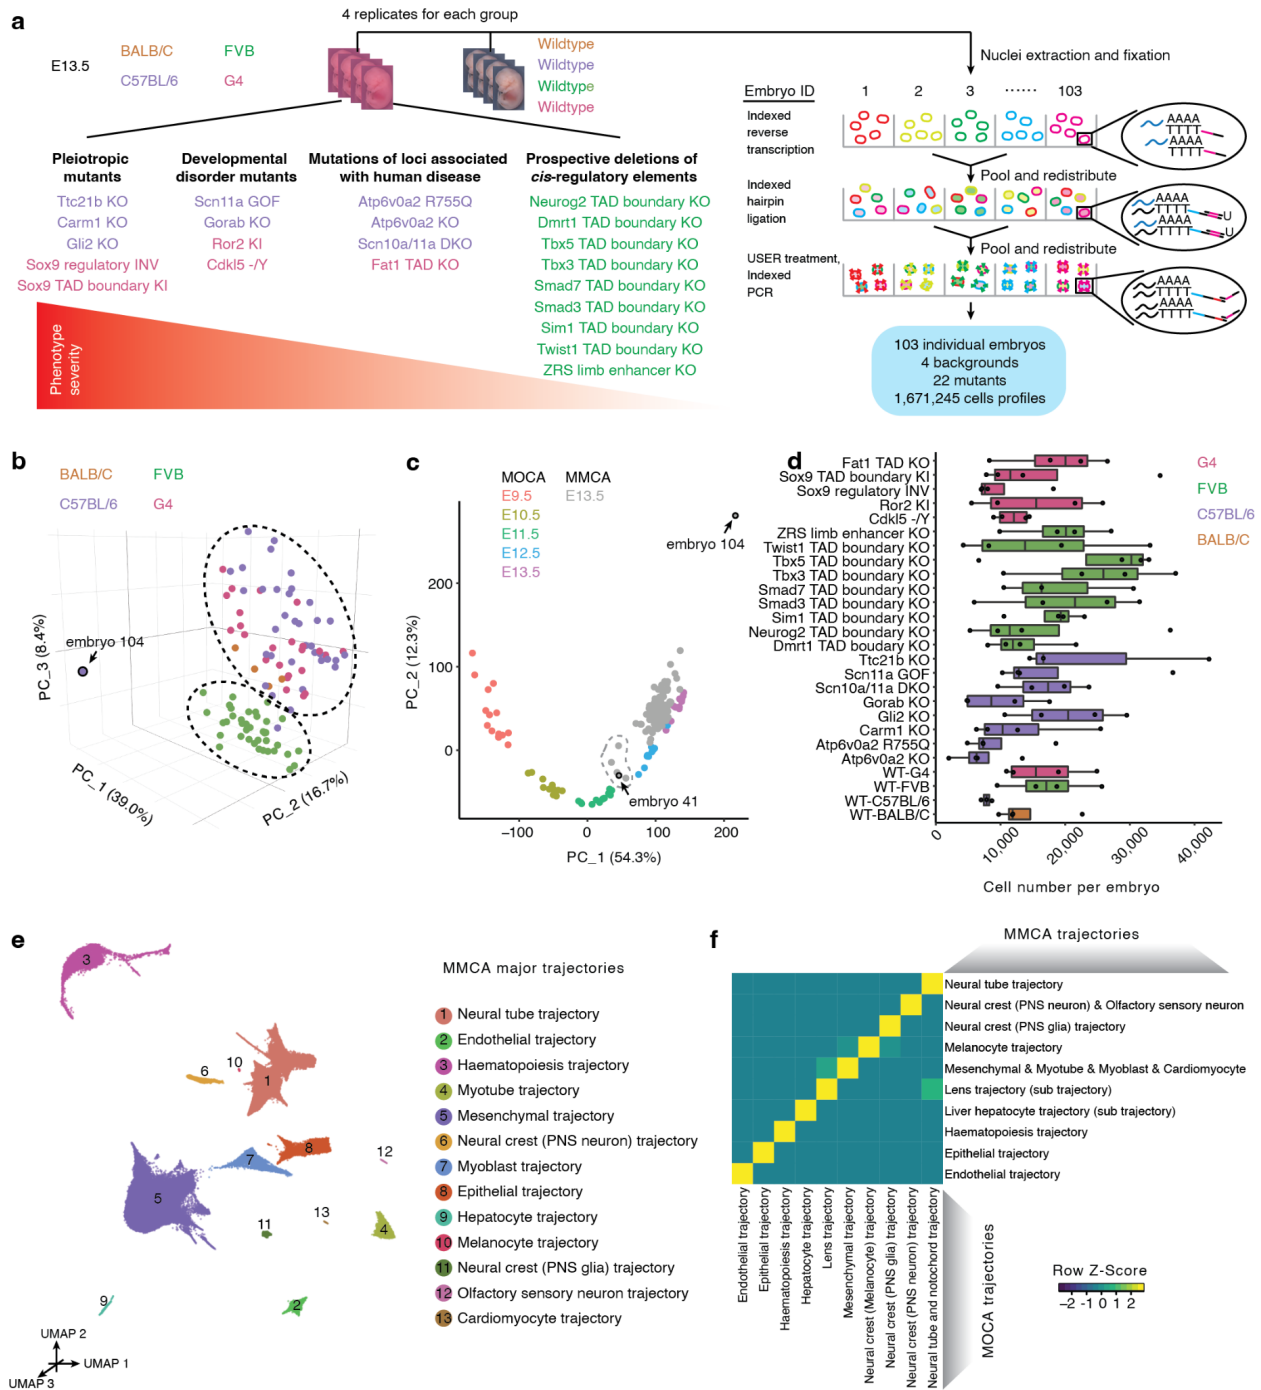

177  
178

179 **Figure 1. Single-cell RNA-seq of 103 whole mouse embryos staged at E13.5.** **a**, We applied sci-RNA-  
180 seq3 to profile 1.6M single cell transcriptomes from 103 individual E13.5 embryos, derived from 22 mutants  
181 and four wildtype strains, in one experiment. **b**, Embeddings of pseudobulk RNA-seq profiles of MMCA  
182 mouse embryos in PCA space with visualisation of top three PCs. Briefly, single cell data from individual  
183 embryos of MMCA were aggregated to create 103 pseudobulk samples. Embryos are colored by  
184 background strain. The black dotted circles highlight two major groups corresponding to FVB vs. other  
185 backgrounds. Embryo #104 was a clear outlier. **c**, Embeddings of pseudobulk RNA-seq profiles of MOCA<sup>17</sup>  
186 and MMCA mouse embryos in PCA space defined solely by MOCA, with MMCA embryos (gray) projected

187 onto it. The top two PCs are visualised. Colored points correspond to MOCA embryos of different stages  
188 (E9.5-E13.5), and grey points to MMCA embryos (E13.5). Embryos #104 and #41 were labelled as outliers  
189 and removed from the dataset, as discussed in the text. The dashed line (manually added) highlights five  
190 MMCA embryos which are colocalized with E11.5 or E12.5 embryos from MOCA. Three are *Scn11a* GOF  
191 (#33, #34, #36), one is *Carm1* KO (#101), and one is C57BL/6 wildtype (#41). **d**, The number of cells  
192 profiled per embryo for each strain. The centre lines show the medians; the box limits indicate the 25th and  
193 75th percentiles; the replicates are represented by the dots. **e**, 3D UMAP visualisation of wildtype subset  
194 of MMCA dataset (215,575 cells from 15 wildtype E13.5 embryos). Cells are colored by major trajectory  
195 annotation. **f**, Correlated developmental trajectories between MOCA<sup>17</sup> and MMCA based on non-negative  
196 least-squares (NNLS) regression (**Methods**). Shown here is a heat map of the combined regression  
197 coefficients (row-scaled) between 10 developmental trajectories from MMCA (rows) and 10 corresponding  
198 developmental trajectories from the MOCA (columns). PNS: peripheral nervous system.  
199

## 200 Mutant-specific differences in cell type composition

201  
202 Analogous to how there are many assays for phenotyping a mouse, there are many computational  
203 strategies that one might adopt in order to investigate mutant-specific differences in these  
204 embryo-scale sc-RNA-seq data. Here we pursued three main approaches: 1) quantification of  
205 gross differences in cell type composition (this section); 2) investigation of more subtle differences  
206 in the distribution of cell states within annotated trajectories and sub-trajectories; and 3) analysis  
207 of the extent to which phenotypic features are shared between mutants.

208  
209 To systematically assess cell type compositional differences, we first examined the proportions  
210 of cells assigned to each of the 13 major trajectories across the 4 wildtype and 22 mutant strains.  
211 For the most part, these proportions were consistent across genotypes (**Supplementary Fig. 5a**).  
212 However, some mutants exhibited substantial differences. For example, compared to the  
213 C57BL/6 wildtype, the proportion of cells falling in the neural tube trajectory decreased from 37.3%  
214 to 33.7% and 32.6% in the *Gli2* KO and *Ttc21b* KO mice, respectively, while the proportion of  
215 cells falling in the mesenchymal trajectory decreased from 44.1% to 37.1% in the *Gorab* KO mice.  
216 These changes are broadly consistent with the gross phenotypes associated with these  
217 mutations<sup>28,33,40,41</sup>, but are caveated by substantial interindividual heterogeneity within each  
218 genotype (**Supplementary Fig. 5b**). Also of note, we observe differences in major trajectory  
219 composition between the four wildtype strains. For example, relative to BALB/C and C57BL/6, the  
220 FVB and G4 wildtype mice consistently had substantially lower proportions of cells in the  
221 mesenchymal trajectory and higher proportions of cells in the neural tube trajectory  
222 (**Supplementary Fig. 5c**).

223  
224 To increase resolution, we sought to investigate compositional differences at the level of sub-  
225 trajectories. For each combination of background (C57BL/6, FVB, G4) and sub-trajectory (n = 54),  
226 we performed a regression analysis to identify instances where a particular mutation was  
227 nominally predictive of the proportion of cells falling in that sub-trajectory (uncorrected  $p$ -value <  
228 0.05; beta-binomial regression; **Methods**). Across the 22 mutants, this analysis highlighted 300  
229 nominally significant changes (**Fig. 2a**; **Supplementary Table 3**). Due to the limited number of  
230 replicate embryos per wildtype and mutant strain, our power to detect changes is limited,  
231 particularly in the smaller trajectories. Nevertheless, several patterns were clear:

232  
233 First, it is evident that *Atp6v0a2* KO and *Atp6v0a2* R755Q, two distinct mutants of the same gene<sup>34</sup>,  
234 are assigned very similar patterns by this analysis, both with respect to which sub-trajectories are  
235 nominally significant as well as the direction and magnitude of changes (first two rows of **Fig. 2a**).  
236 Although perhaps expected, the consistency supports the validity of this analytical approach.

237  
238 Second, the mutants varied considerably with respect to the number of sub-trajectories that were  
239 nominally significant for compositional differences. At the higher extreme, the proportions of cells  
240 falling in 30 of 54 sub-trajectories were nominally altered by the *Sox9* regulatory INV mutation,  
241 consistent with the wide-ranging roles of *Sox9* in development<sup>42,43</sup>. On the other hand, other  
242 mutants, such as the TAD boundary knockouts, exhibited comparatively few changes, consistent  
243 with the paucity of gross phenotypes in such mutants<sup>16</sup>. Nonetheless, all TAD boundary knockouts

244 did show some changes, including specific ones, e.g. the lung epithelial and liver hepatocyte  
245 trajectories were decreased in the *Dmrt1* and *Tbx3* TAD boundary KOs, respectively, but not in  
246 other TAD boundary knockouts. At the lower extreme, the *Sim1* TAD boundary KO exhibited just  
247 two altered sub-trajectories.

248

249 Third, some sub-trajectories exhibited altered proportions in many mutants (e.g. the  
250 mesencephalon/MHB trajectory in 12 mutants) while others were changed only in a few (e.g. the  
251 definitive erythroid trajectory in *Ror2* KI only). In some cases, such patterns were “block-like” by  
252 background strain (e.g. all B6 mutants exhibited gains in endothelial cells and losses in  
253 endocardium). Although particular sub-trajectories might be vulnerable to disruption in a strain-  
254 specific way, it is also possible that this is a technical artefact (e.g. if the four wildtype replicates  
255 that we profiled for a given strain were atypical).

256

257 There were a few extreme examples, e.g. where a sub-trajectory appeared to be fully lost in a  
258 specific mutant. For example, *Ttc21b*, which encodes a ciliary protein and whose knockout is  
259 associated with brain, bone and eye phenotypes<sup>28,44,45</sup>, exhibited a dramatic reduction in the  
260 proportion of cells in the retinal neuron trajectory ( $\log_2(\text{ratio}) = -6.69$ ; unadjusted  $p$ -value = 0.028;  
261 beta-binomial regression) (**Fig. 2b**), as well as the lens ( $\log_2(\text{ratio}) = -2.64$ ) and retina epithelium  
262 ( $\log_2(\text{ratio}) = -2.32$ ) trajectories (**Supplementary Fig. 6**). Validating this finding, the developing  
263 eye appears diminished in the homozygous *Ttc21b* mutant at E11.5 embryos compared to the  
264 wildtype or heterozygous mutant (**Fig. 2c**).

265

266 However, most changes were relatively subtle. For example, the ZRS limb enhancer KO is a well-  
267 studied mutant which shows a loss of the distal limb structure at birth<sup>46</sup>. This analytical framework  
268 highlighted eight sub-trajectories whose proportions were nominally altered in the ZRS limb  
269 enhancer KO, most of which were mesenchymal. However, although the most extreme, the  
270 reduction in limb mesenchymal cells was only about 30% ( $\log_2(\text{ratio}) = -0.49$ ; unadjusted  $p$ -value  
271 =  $6.32e-3$ ; beta-binomial regression). To assess whether further subpopulations of the limb  
272 mesenchyme were more substantially changed, we performed co-embedding of limb  
273 mesenchyme cells from the ZRS limb enhancer KO and the FVB wildtype. Indeed, a  
274 subpopulation of the limb mesenchyme was much more markedly affected (**Fig. 2d**;  
275 **Supplementary Fig. 7a**), and this subpopulation specifically expressed markers of the distal  
276 mesenchyme of the early embryonic limb bud, such as *Hoxa13* and *Hoxd13* (**Fig. 2e**)<sup>47</sup>. Of note,  
277 we did not observe such heterogeneity when we examined the seven other sub-trajectories whose  
278 proportions were nominally altered in the ZRS limb enhancer KO (**Supplementary Fig. 7b**),  
279 consistent with the specificity of this phenotype.

280



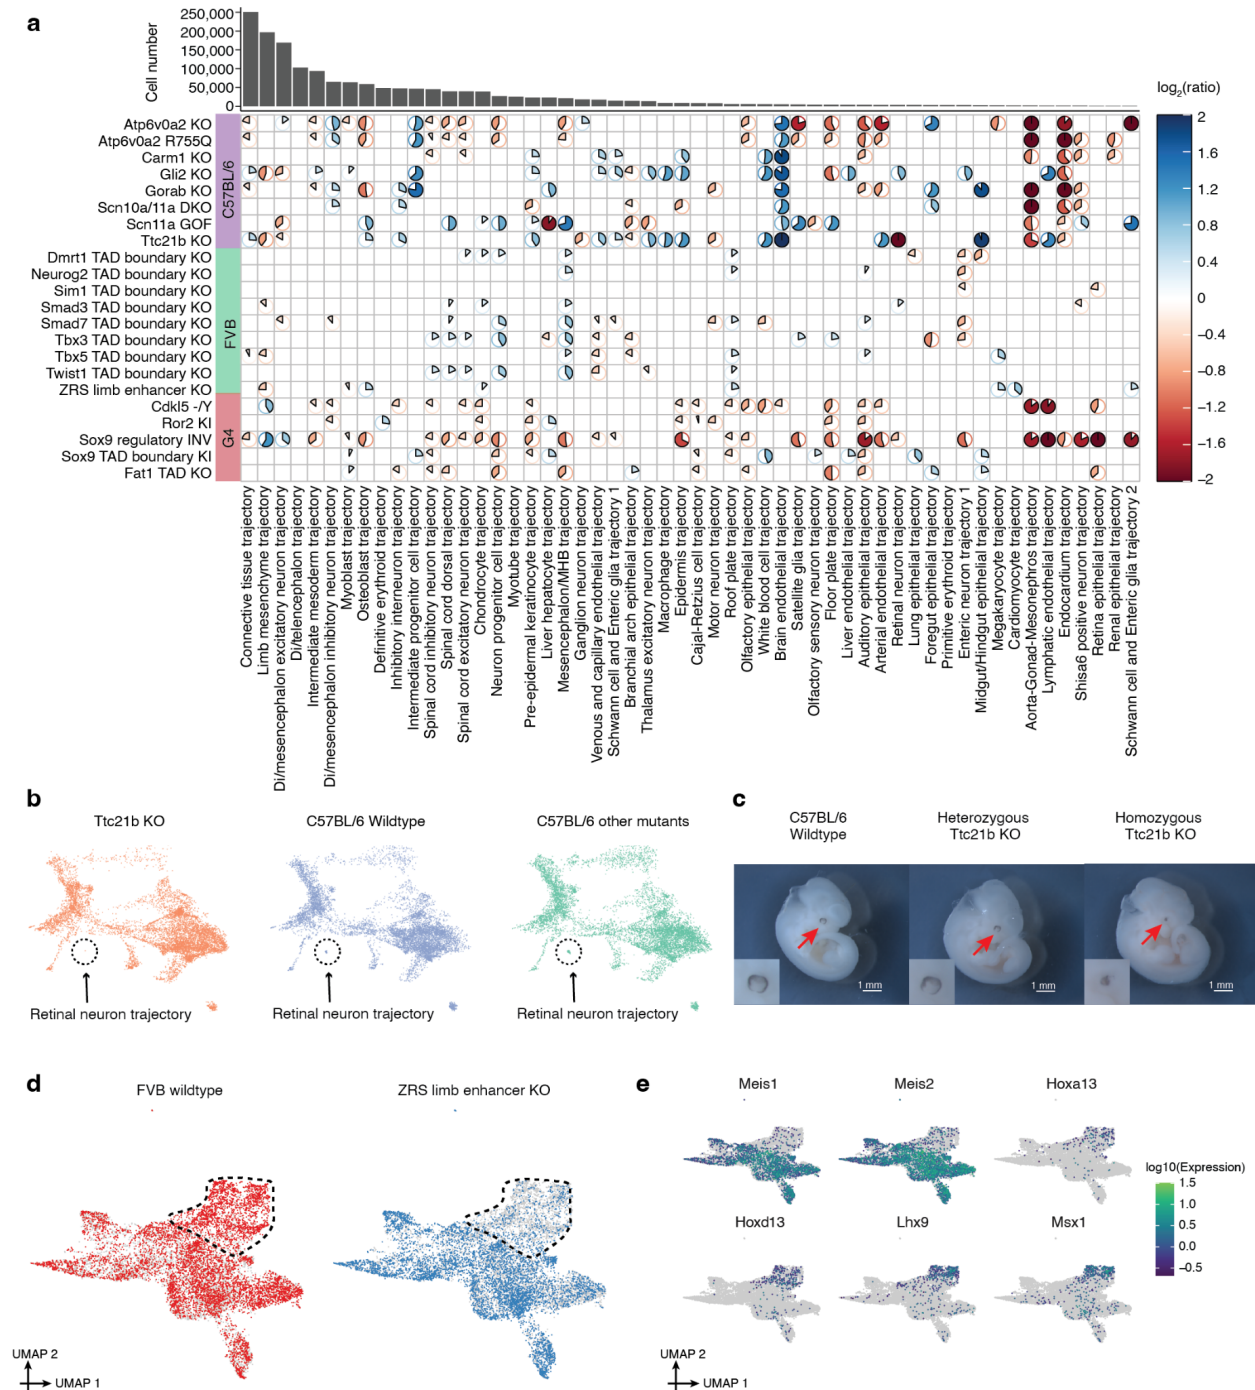

281  
282

283 **Figure 2. Cell composition changes for individual mutants across developmental trajectories.** **a**,  
284 Heatmap shows log<sub>2</sub> transformed ratios of the cell proportions between each mutant type (y-axis) and its  
285 corresponding wildtype background, across individual sub-trajectories (x-axis). Sub-trajectories with a  
286 mean number of cells across individual embryos of less than ten were excluded from this analysis, leaving  
287 54 (columns). Only those combinations of mutant and sub-trajectory which were nominally significant in the  
288 regression analysis are shown (see text and **Methods**; uncorrected *p*-value < 0.05; beta-binomial  
289 regression). For calculating the displayed ratios, cell counts from replicates were merged. The pie color and  
290 direction correspond to whether the log<sub>2</sub> transformed ratio is above 0 (blue, clockwise) or below 0 (red,



291 anticlockwise), while the pie size and colour intensity correspond to the scale of log<sub>2</sub> transformed ratio. A  
292 handful of log<sub>2</sub> transformed ratios with > 2 (or < -2) were manually set to 2 (or -2) for a better visualisation.  
293 The number of cells assigned to each developmental trajectory in the overall dataset is shown above the  
294 heatmap. **b**, 3D UMAP visualisation of the neural tube trajectory, highlighting cells from either the *Ttc21b*  
295 KO (left), C57BL/6 wildtype (middle), or other mutants on the C57BL/6 background (right). The three plots  
296 were randomly downsampled to the same number of cells ( $n = 8,749$  cells). **c**, Homozygous *Ttc21b* KO  
297 mice embryo (E11.5) showed abnormal eye development. **d**, UMAP visualisation of co-embedded cells of  
298 limb mesenchyme trajectory from the ZRS limb enhancer KO and FVB wildtype. The same UMAP is shown  
299 twice for both, highlighting cells from either FVB wildtype (left) or ZRS limb enhancer KO (right). The subset  
300 of cells in this co-embedding exhibiting more extreme loss in the ZRS limb enhancer KO is highlighted. **e**,  
301 The same UMAP as in panel **d**, colored by gene expression of marker genes which appear specific to  
302 proximal limb development (*Meis1*, *Meis2*)<sup>48,49</sup> and distal limb development (*Hoxa13*, *Hoxd13*, *Lhx9*,  
303 *Msx1*)<sup>47,50,51</sup>. Gene expression was calculated from original UMI counts normalised to size factor per cell,  
304 followed by 10-log transformation. PNS: peripheral nervous system. MHB: midbrain-hindbrain boundary.  
305 Di: Diencephalon.  
306

## 307 LochNESS analysis reveals differences in transcriptional state within cell type trajectories

308

309 Given that most of the mutants that we studied did not exhibit macroscopic anatomical defects or  
310 otherwise severe phenotypes at E13.5, we next sought to develop a more sensitive approach for  
311 detecting deviations in transcriptional programs within cell type trajectories. Specifically, we  
312 developed “lochNESS” (local cellular heuristic Neighbourhood Enrichment Specificity Score),  
313 score that is calculated based on the “neighbourhood” of each cell in a sub-trajectory co-  
314 embedding of a given mutant (all replicates) vs. a pooled wildtype (all replicates of all backgrounds)  
315 (**Fig. 3a; Methods**; although developed independently, this approach is similar to recent work by  
316 Dann and colleagues<sup>52</sup>). Briefly, we took the aligned PC features of each sub-trajectory, as  
317 described above, and found k-NNs for each cell, excluding cells from the same mutant replicate  
318 from consideration. For each mutant cell, we then computed the ratio of the observed vs. expected  
319 number of mutant cells in its neighbourhood, with expectation simply based on the overall ratio of  
320 mutant vs. wildtype cells in co-embedding. In the scenario where mutant and wildtype cells are  
321 fully mixed, the resulting ratio should be close to 1. The final lochNESS was defined as the ratio  
322 minus 1, equivalent to the fold change of mutant cell composition.

323

324 Visualisation of lochNESS in the embedded space highlights areas with enrichment or depletion  
325 of mutant cells. For example, returning to the previously discussed ZRS limb enhancer KO mice,  
326 we observed markedly low lochNESS in a portion of the limb mesenchymal trajectory  
327 corresponding to the distal limb (**Fig. 3b; Fig. 2d**). This highlights the value of the lochNESS  
328 framework, as within the sub-trajectory (limb mesenchyme), an effect could be detected and also  
329 assigned to a subset of cells in a label-agnostic fashion.

330

331 Plotting the global distributions of lochNESS for each mutant across all sub-trajectories, we further  
332 observed that some mutants (e.g. most TAD boundary knockouts; *Scn11a* GOF) exhibit  
333 unremarkable distributions (**Fig. 3c**). However, others (e.g. *Sox9* regulatory INV; *Scn10a/11a*  
334 DKO) are associated with a marked excess of high lochNESS, consistent with mutant-specific  
335 effects on transcriptional state across many developmental systems. Of note, we confirmed that  
336 repeating the calculation of lochNESS after random permutation of mutant and wildtype labels  
337 resulted in bell-shaped distributions centred around zero (**Supplementary Fig. 8a**). As such, the  
338 deviance of lochNESS can be summarised as the average euclidean distance between lochNESS  
339 vs lochNESS under permutation (**Supplementary Fig. 8b**).

340

341 We next examined lochNESS within each mutant of each sub-trajectory to identify system-specific  
342 phenotypes. For example, consistent with results shown above, we observed low lochNESS  
343 within the retinal neuron sub-trajectory in the *Ttc21b* KO (**Fig. 3d; Supplementary Fig. 8c**). We  
344 also observed a strong shift towards low scores for the floor plate sub-trajectory in the *Gli2* KO,  
345 and interestingly, a more subtle change in lochNESS distribution for the roof plate trajectory,  
346 which is forming opposite to the floor plate along the D-V axis of the developing neural tube (**Fig.**  
347 **3d; Supplementary Fig. 8c**). To explore this further, we extracted and reanalyzed cells  
348 corresponding to the floor plate and roof plate. Within the floor plate, *Gli2* KO cells consistently  
349 exhibited low lochNESS (**Fig. 3e**). However, there were only a handful of differentially expressed  
350 genes between wildtype and mutant cells, and no significantly enriched pathways within that set.

351 For example, genes like *Robo1* and *Slit1*, both involved in neuronal axon guidance, are  
352 specifically expressed in the floor plate relative to the roof plate (**Fig. 3f; Supplementary Fig. 8g**),  
353 but are not differentially expressed between wildtype and *Gli2* KO cells of the floor plate.  
354 Alternatively, our failure to detect substantial differential expression may be due to power, as there  
355 were fewer floor plate cells in the *Gli2* KO (~60% reduction). Overall, these observations are  
356 consistent with the established role of *Gli2* in floor plate induction and the previous demonstration  
357 that *Gli2* knockouts fail to induce a floor plate (Matise et al. 1998; Ding et al. 1998).

358  
359 Less expectedly, this focused analysis also revealed two subpopulations of roof plate cells, one  
360 depleted and the other enriched for *Gli2* KO cells (**Fig. 3e; Supplementary Fig. 8d-f**). To annotate  
361 these subpopulations, we examined genes whose expression was predictive of lochNESS via  
362 regression (**Methods**). The mutant-enriched group of roof plate cells was marked by *Ttr*, a marker  
363 for choroid plexus and dorsal roof plate development<sup>53</sup>, as well as genes associated with the  
364 development of cilia (e.g. *Cdc20b*, *Gmnc*, *Dnah6* and *Cfap43*), while the mutant-depleted group  
365 was marked by Wnt signaling-related genes including *Rspo1/2/3* and *Wnt3a/8b/9a* (**Fig. 3f;**  
366 **Supplementary Fig. 8g; Supplementary Table 3**)<sup>54-57</sup>. It has been shown that ventrally-  
367 expressed *Gli2* plays a central role in dorsal-ventral patterning of the neural tube by antagonising  
368 Wnt/Bmp signalling from the dorsally-located roof plate<sup>58</sup>. Our results are consistent with this, and  
369 also define two subpopulations of roof plate cells on which *Gli2* KO appears to have differential  
370 effects. Of note, the relatively subtle and opposing effects on these roof plate subpopulations  
371 were missed by our original analysis of cell type proportions, and only uncovered by the  
372 granularity of the lochNESS strategy.

373  
374 LochNESS distributions can be systematically screened to identify sub-trajectories exhibiting  
375 substantial mutant-specific shifts. For example, while all TAD boundary KO mutants have similarly  
376 unremarkable global lochNESS distributions, when we plot these distributions by sub-trajectory,  
377 a handful of shifted distributions are evident (**Supplementary Fig. 9a**). Such deviations,  
378 summarised as the average euclidean distances between lochNESS and lochNESS under  
379 permutation, are visualised in **Supplementary Fig. 9b**. For example, multiple epithelial sub-  
380 trajectories, including pre-epidermal keratinocyte, epidermis, branchial arch, and lung epithelial  
381 trajectories, are most shifted in *Tbx3* TAD boundary KO cells. Co-embeddings of mutant and  
382 wildtype cells of these sub-trajectories, together with regression analysis, identify multiple keratin  
383 genes as positively correlated with lochNESS, consistent with a role for *Tbx3* in epidermal  
384 development (**Supplementary Fig. 9c-d; Supplementary Table 4**)<sup>59,60</sup>. The lung epithelial cells  
385 were separated into two clusters, with the cluster more depleted in *Tbx3* TAD boundary KO cells  
386 marked by *Etv5*, a transcription factor associated with alveolar type II cell development, as well  
387 as *Bmp* signalling genes that regulate *Tbx3* during lung development (*Bmp1/4*), and distal airway  
388 markers *Sox9* and *Id2*<sup>60-62</sup>.

389

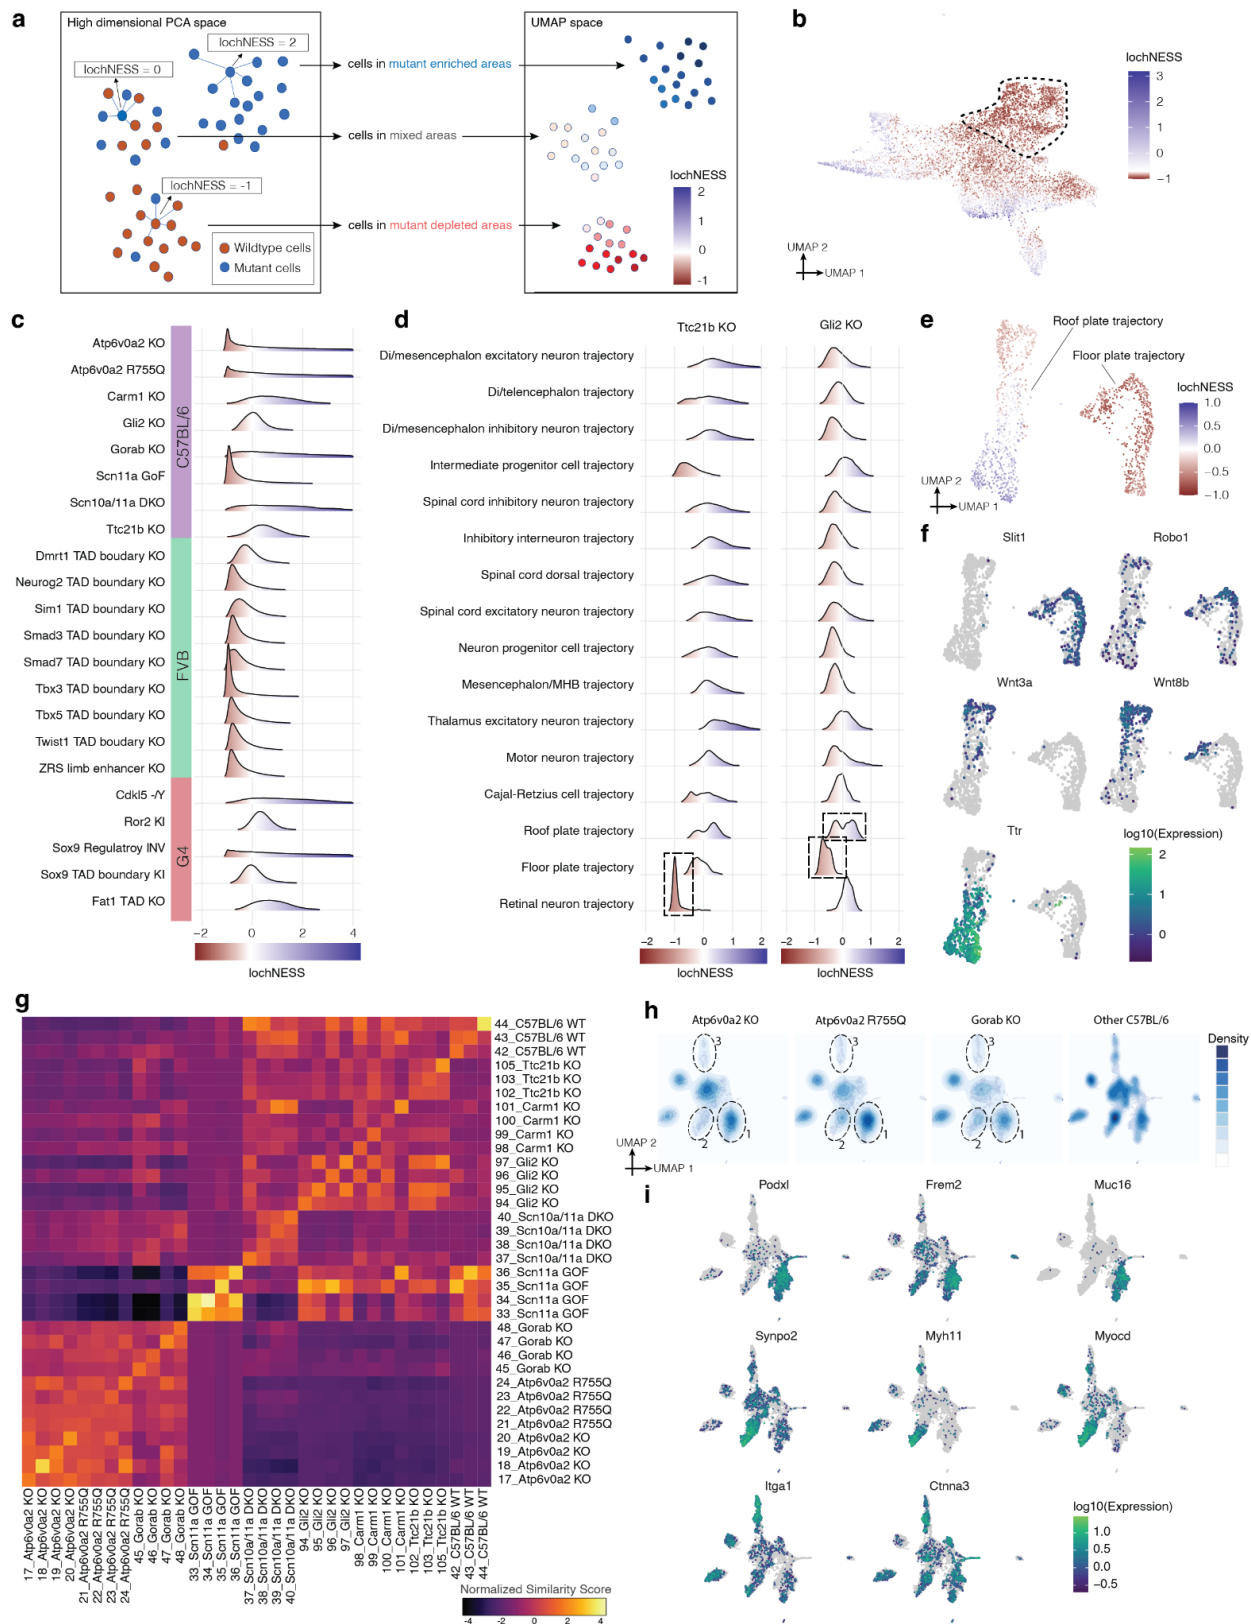

390  
391

392 **Figure 3. LochNESS analysis identifies mutant related changes.** **a**, Schematic of lochNESS calculation  
393 and visualisation. **b**, UMAP visualisation of co-embedded cells of limb mesenchyme trajectory from the ZRS  
394 limb enhancer KO and FVB wildtype, colored by lochNESS, with colour scale centred at the median of  
395 lochNESS. The subset of cells in this co-embedding that corresponds to the area exhibiting more extreme  
396 loss in the ZRS limb enhancer KO cells in Fig. 2d is highlighted (dashed circle). **c**, Distribution of lochNESS  
397 across all 64 sub-trajectories in each mutant. **d**, Distribution of lochNESS in the neural tube sub-trajectories  
398 of the *Ttc21b* KO and *Gli2* KO mutants. Dashed boxes highlight the shifted distributions of the retinal neuron  
399 sub-trajectory of the *Ttc21b* KO mutant and the floor plate and roof plate sub-trajectories of the *Gli2* KO  
400 mutant. **e**, UMAP visualisation of co-embedded cells of the floor plate and roof plate sub-trajectories from  
401 the *Gli2* KO mutant and pooled wildtype, colored by lochNESS. **f**, same as in panel **e**, but colored by  
402 expression of selected marker genes. **g**, Heatmap showing similarity scores between individual C57BL/6  
403 embryos in the mesenchymal trajectory. Rows and columns are grouped by genotype and labelled by  
404 embryo id and genotype. **h**, UMAPs showing the co-embedding of the intermediate mesoderm sub-  
405 trajectory for mutants from the C57BL/6 background strain, with cell density and distributions overlaid.  
406 Dashed circles highlight three clusters of cells where *Atp6v0a2* KO, *Atp6v0a2* R755Q and *Gorab* KO mice  
407 exhibit enrichment (cluster 1) or depletion (clusters 2 & 3), compared to other mutants in the C57BL/6  
408 background strain. **i**, same as in panel **h**, but colored by expression of marker genes of the clusters  
409 highlighted in panel **h**.  
410

## 411 Identification of mutant-specific and mutant-shared effects

412

413 Pleiotropy, wherein a single gene influences multiple, unrelated traits, is a pervasive phenomenon  
414 in developmental genetics, and yet remains poorly understood<sup>63</sup>. A corollary of pleiotropy is that  
415 there are also specific traits that appear to be influenced by multiple, unrelated genes. For the  
416 most part, the characterization of the sharing of phenotypic features between multiple Mendelian  
417 disorders has remained coarse. For example, many disorders share macrocephaly as a feature,  
418 but it remains largely unexplored whether the molecular and cellular basis for macrocephaly is  
419 shared between them, unique to each, or somewhere in between.

420

421 Although here we have “whole embryo” molecular profiling of just 22 mutants, we sought to  
422 investigate whether we could distinguish between mutant-specific and mutant-shared effects  
423 within each major trajectory. In brief, within a co-embedding of cells from all embryos from a given  
424 background strain, we computed k-NNs as in **Fig. 3a**, and then calculated the observed vs.  
425 expected ratio of each genotype among a cell’s k-NNs. The “similarity score” between one  
426 genotype vs. all others is defined as the mean of these ratios across cells of the genotype. To  
427 assess whether any observed similarities or dissimilarities are robust, we can also calculate  
428 similarity scores between individual embryos. For example, for the mesenchymal trajectory of  
429 C57BL/6 mutants, similarity scores are generally higher for pairwise comparisons of individuals  
430 with the same genotype (**Fig. 3g; Supplementary Fig. 10a-b**).

431

432 The *Scn11a* GOF mutant exhibited the most extreme similarity scores, in terms of both similarity  
433 between replicates and dissimilarity with other genotypes (**Fig. 3g; Supplementary Fig. 10a**).  
434 The *Scn11a* GOF mutant carries a missense mutation in the *Scn11a* locus which is reported to  
435 result in reduced pain sensitivity both in mice and men without obvious signs of  
436 neurodegeneration, suggesting altered electrical activity of peripheral pain-sensing neurons and  
437 impaired synaptic transmission to postsynaptic neurons (Leipold et al. 2013). However, at least  
438 grossly, the mutant does not seem to be associated with mesenchymal phenotypes. Noting that  
439 the *Scn11a* GOF mutant embryos clustered with E12.5 embryos instead of E13.5 embryos in our  
440 pseudobulk analysis (**Fig. 1c**), we speculated that its extreme similarity scores might be  
441 attributable to developmental delay of the *Scn11a* GOF mutant at the scale of the whole embryo.  
442 To investigate this further, we co-embedded *Scn11a* GOF mutant cells with pooled wildtype cells  
443 and MOCA cells from the neural tube trajectory. While wildtype cells were distributed near E13.5 cells  
444 from MOCA, the *Scn11a* GOF cells were embedded closer to cells from earlier developmental  
445 timepoints (**Supplementary Fig. 10d**). As a more systematic approach, we calculated a “time score”  
446 for each cell from the MMCA dataset by taking the k-NNs of each MMCA cell in the MOCA dataset  
447 and calculating the average of the developmental time of the MOCA cells. The relative time score  
448 distributions of *Scn11a* GOF cells and wildtype cells suggest that *Scn11a* GOF cells are significantly  
449 delayed in all major trajectories examined (single sided student’s t-test, raw p-value < 0.01;  
450 **Supplementary Fig. 10e**). As such, the apparently unique signature of *Scn11a* GOF cells might be  
451 attributable to these embryos simply being earlier in development, suggesting a more global role for  
452 sodium ion channels not only for neuronal function but also early development and cell fate  
453 determination<sup>64</sup>. Incorrect staging is formally possible, but unlikely because the embryos derived from  
454 three independent litters.



455  
456 In sharp contrast with the relative uniqueness of the *Scn11a* GOF mutant, we also observed that  
457 the similarity scores between three mutants -- *Atp6v0a2* KO, *Atp6v0a2* R755Q and *Gorab* KO --  
458 was consistent with shared effects, in the mesenchymal, epithelial, endothelial, hepatocyte and  
459 neural crest (PNS glia) trajectories in particular; in other main trajectories, such as neural tube  
460 and hematopoiesis, *Atp6v0a2* KO and *Atp6v0a2* R755Q exhibited high similarity scores with one  
461 another, but not with *Gorab* KO (**Fig. 3g**; **Supplementary Fig. 10a,c,f**). Such sharing is perhaps  
462 expected between the *Atp6v0a2* KO and *Atp6v0a2* R755Q mutants, as they involve the same  
463 gene. In human patients, mutations in *ATP6V0A2* and *GORAB* cause overlapping connective  
464 tissue disorders, which is reflected in the misregulation of the mesenchymal trajectory of *Atp6v0a2*  
465 and *Gorab* mutants<sup>34-33</sup>. However, only the *ATP6V0A2*-related disorder displays a prominent CNS  
466 phenotype, consistent with the changes in the neural tube trajectory seen only in both *Atp6v0a2*  
467 models (**Supplementary Fig. 10a,c,f**).

468  
469 In order to explore phenotypic sharing between these genotypically distinct mutants at greater  
470 granularity, we co-embedded cells of the intermediate mesoderm sub-trajectory from C57BL/6  
471 strains. We identified three subclusters of intermediate mesoderm where *Atp6v0a2* KO, *Atp6v0a2*  
472 R755Q and *Gorab* KO mice are similarly distributed compared to other C57BL/6 genotypes (**Fig.**  
473 **3h,i**). In particular, cluster 1 is enriched for cells from *Atp6v0a2* KO, *Atp6v0a2* R755Q and *Gorab*  
474 KO mice and is marked by genes related to epithelial-to-mesenchymal transition, cell-cell  
475 adhesion and migration, such as *Podxl*, *Frem2* and *Muc16*<sup>65-67</sup>. Clusters 2 and 3 are depleted in  
476 cells from *Atp6v0a2* KO, *Atp6v0a2* R755Q and *Gorab* KO mice and are marked by muscular  
477 development related genes like *Synpo2*, *Myh11* and *Myocd* (cluster 2), and cell-cell adhesion  
478 related genes like *Itga1* and *Ctnna3* (cluster 3)<sup>68-72</sup>.

479  
480 Altogether, these analyses illustrate how the joint analysis of mutants subjected to whole embryo  
481 sc-RNA-seq has the potential to reveal sharing of molecular and cellular phenotypes. This  
482 includes global similarity (e.g. *Atp6v0a2* KO vs. *Atp6v0a2* R755Q) as well as instances in which  
483 specific aspects of phenotypes are shared between previously unrelated mutants (e.g. *Atp6v0a2*  
484 mutants vs. *Gorab* KO).

#### 485 486 Global developmental defects in *Sox9* regulatory mutant

487  
488 About half of the mutants profiled in this study model disruptions of regulatory, rather than coding,  
489 sequences. Among these, the *Sox9* regulatory INV mutant stands out in having a dramatically  
490 shifted lochNESS distribution, particularly in the mesenchymal trajectory (**Fig. 3c**; **Fig. 4a**). The  
491 *Sox9* locus encodes a pleiotropic transcription factor that plays a central role during the  
492 development of the skeleton, the brain, in sex determination as well as several other tissues  
493 during embryogenesis, orchestrated by a complex regulatory landscape<sup>73-81</sup>. This particular  
494 mutant features an inversion of a 1Mb region upstream of *Sox9* that includes several distal  
495 enhancers and a TAD boundary, essentially relocating these elements into a TAD with *Kcnj2*,  
496 which encodes a potassium channel (**Fig. 4b**)<sup>27 82,83</sup>. Consistent with the heterozygous and  
497 homozygous *Sox9* knockout, the homozygous *Sox9* regulatory INV is perinatally lethal, with  
498 extensive skeletal phenotypes including digit malformation, a cleft palate, bowing of bones and

499 delayed ossification. In addition to the loss of 50% of Sox9 expression, the inversion was  
500 previously shown to lead to pronounced misexpression of *Kcnj2* in the digit anlagen in a wildtype  
501 Sox9 pattern<sup>27</sup>. However, the extent to which *Kcnj2* and Sox9 are mis-expressed elsewhere, as  
502 well as the molecular and cellular correlates of the widespread skeletal phenotype, have yet to be  
503 deeply investigated.

504  
505 At the level of mesenchymal sub-trajectories, shifts in lochNESS distribution for Sox9 regulatory  
506 INV were consistently observed, but the limb mesenchyme and connective tissue were  
507 particularly enriched for cells with extremely high lochNESS (**Fig. 4a**, right). Of relevance, 2 of the  
508 3 major enhancers (E250 and E195) known to drive Sox9-mediated chondrogenesis in  
509 mesenchymal stem cells are located within the inverted region (**Fig. 4b**)<sup>75</sup>. Cell type composition  
510 analysis (**Fig. 2a**) showed that Sox9 regulatory INV mutants harbor considerably larger numbers  
511 of cells classified as limb mesenchyme, at the expense of osteoblasts, intermediate mesoderm,  
512 chondrocytes and connective tissue trajectory. This shift can also be seen in a UMAP embedding  
513 (**Fig. 4c**), a topic that we revisit further below.

514  
515 These changes in cell type composition were accompanied by reduced expression of Sox9 and  
516 increased expression of *Kcnj2* in bone (aggregate of chondrocyte, osteoblast, limb mesenchyme;  
517 **Supplementary Fig. 11a**), although the number of cells expressing *Kcnj2* was generally low. This  
518 suggests that the Sox9 regulatory inversion is resulting in increased *Kcnj2* expression (via Sox9  
519 enhancer adoption) and Sox9 reduction (via boundary repositioning) not only in the digit anlagen,  
520 but in skeletal mesenchyme more generally. To validate this, we performed RNA *in situ*  
521 hybridization (RNAscope) on sections of developing bones of the rib cage at E13.5, comparing a  
522 heterozygous Sox9 regulatory INV mouse with a wildtype littermate. Consistent with our sc-RNA-  
523 seq data derived from homozygous mutants, we observe a Sox9-patterned increase in *Kcnj2*  
524 levels, together with losses in Sox9 expression, in the developing bone (**Fig. 4d**; **Supplementary**  
525 **Fig. 11b**).

526  
527 Since the inverted Sox9 regulatory region also hosts multiple enhancers active in other tissues  
528 (e.g. E161-lung; E239-cerebral cortex)<sup>75</sup>, we wondered whether these patterns were also seen in  
529 other tissues. Indeed, both sc-RNA-seq expression analysis and RNAscope quantification show  
530 increased *Kcnj2* levels in all other tissues examined. While reductions in Sox9 expression, clear  
531 in bone, were not observed in most other tissues in our single cell data, RNAscope quantification  
532 showed reductions in Sox9 expression in the telencephalon and lung as well (**Supplementary**  
533 **Fig. 11**). Taken together, these data suggest marked changes in mesenchyme due to reductions  
534 of Sox9 expression (presumably due to separation from key enhancers), together with broader  
535 increases in *Kcnj2* expression (presumably due to the appropriation of Sox9 enhancers).

536  
537 To explore the apparent effects of the Sox9 regulatory inversion on mesenchyme in more detail,  
538 in particular the apparent accumulation of limb mesenchyme (**Fig. 4c**), we reanalyzed mutant and  
539 wildtype cells from the limb mesenchyme sub-trajectory on their own, which revealed subsets  
540 corresponding to condensing mesenchyme, perichondrium, and undifferentiated mesenchyme  
541 (**Supplementary Fig. 12a,b**). This analysis further revealed that the vast majority of limb  
542 mesenchyme “accumulation” in mutant embryos was due to a large proportion of cells that appear

543 delayed or stalled in an undifferentiated or stem-like state, rather than an accumulation of more  
544 advanced limb mesenchyme (**Fig. 4c**, bottom panels; **Supplementary Fig. 12a**). Of note,  
545 because the annotation of “limb mesenchyme” for this sub-trajectory was propagated forward  
546 from earlier stages of development during the creation of MOCA, we cannot rule out that other,  
547 non-limb mesenchymal populations contribute to this expanded, undifferentiated pool in the Sox9  
548 regulatory INV embryos as well.

549  
550 Inspection of density plots and RNA velocity suggested that wildtype undifferentiated  
551 mesenchymal cells (a subset of cells annotated as limb mesenchyme in **Fig. 4c**) are poised to  
552 undergo differentiation into diverse subtypes (**Fig. 4c**; **Supplementary Fig. 12a**). In sharp  
553 contrast, undifferentiated mesenchymal cells from Sox9 regulatory INV embryos accumulate at  
554 the “source” of differentiation, and also appear to acquire a distinct state (high density region in  
555 bottom right sub-panel of **Fig. 4c**). This accumulation is even more apparent in integrated views  
556 of the limb mesenchyme sub-trajectory, where we observe two distinct branches, each heavily  
557 enriched for Sox9 regulatory INV mutant cells, within undifferentiated mesenchyme (**Fig. 4e**;  
558 **Supplementary Fig. 13a**).

559  
560 To investigate these two branches further, we performed sub-clustering of Sox9 regulatory INV  
561 undifferentiated mesenchyme cells, followed by differential expression analysis (**Fig. 4f,g**).  
562 Interestingly, the most differentially expressed genes in “branch 1” were neuronal, *e.g.* several  
563 neurexins and neuregulin 3, an observation that was supported by single-sample gene set  
564 enrichment analysis (ssGSEA)<sup>84</sup>, which further highlighted KRAS and other signalling pathways  
565 (**Fig. 4g**; **Supplementary Fig. 13b,c**). Of note, mesenchymal stem cells can be differentiated to  
566 neuronal states *in vitro*<sup>85</sup>. Although further investigation is necessary, we note that cells  
567 contributing to “branch 0” as well as the neuronal-trending “branch 1” are present in wildtype  
568 embryos, albeit at much reduced frequencies compared to the Sox9 regulatory INV mutant  
569 (**Supplementary Fig. 13a**, left).

570  
571 In sum, consistent with what is known about the role of Sox9 as a driver gene in cartilage and  
572 skeletal development, our data reveals a redirection in the differentiation of osteoblast,  
573 chondrocytes and other derivatives of the undifferentiated mesenchyme in the Sox9 regulatory  
574 INV mutant. Among mutants on the G4 background, the observed pattern is specific to the Sox9  
575 regulatory INV mutant (**Supplementary Fig. 14**). Remarkably however, when we examine the  
576 entire dataset (**Supplementary Fig. 14-16**), we observe a similar accumulation of undifferentiated  
577 mesenchymal cells in the *Atp6v0a2* KO, *Atp6v0a2* R755Q, and *Gorab* KO mutants, indicating  
578 sharing of this sub-phenotype amongst 4 of 22 mutants examined (**Supplementary Fig. 16-17**).  
579 This observation further illustrates the potential for systematic, whole embryo analysis to reveal  
580 sharing of molecular and cellular sub-phenotypes across pleiotropic developmental mutants in  
581 unexpected ways.

582

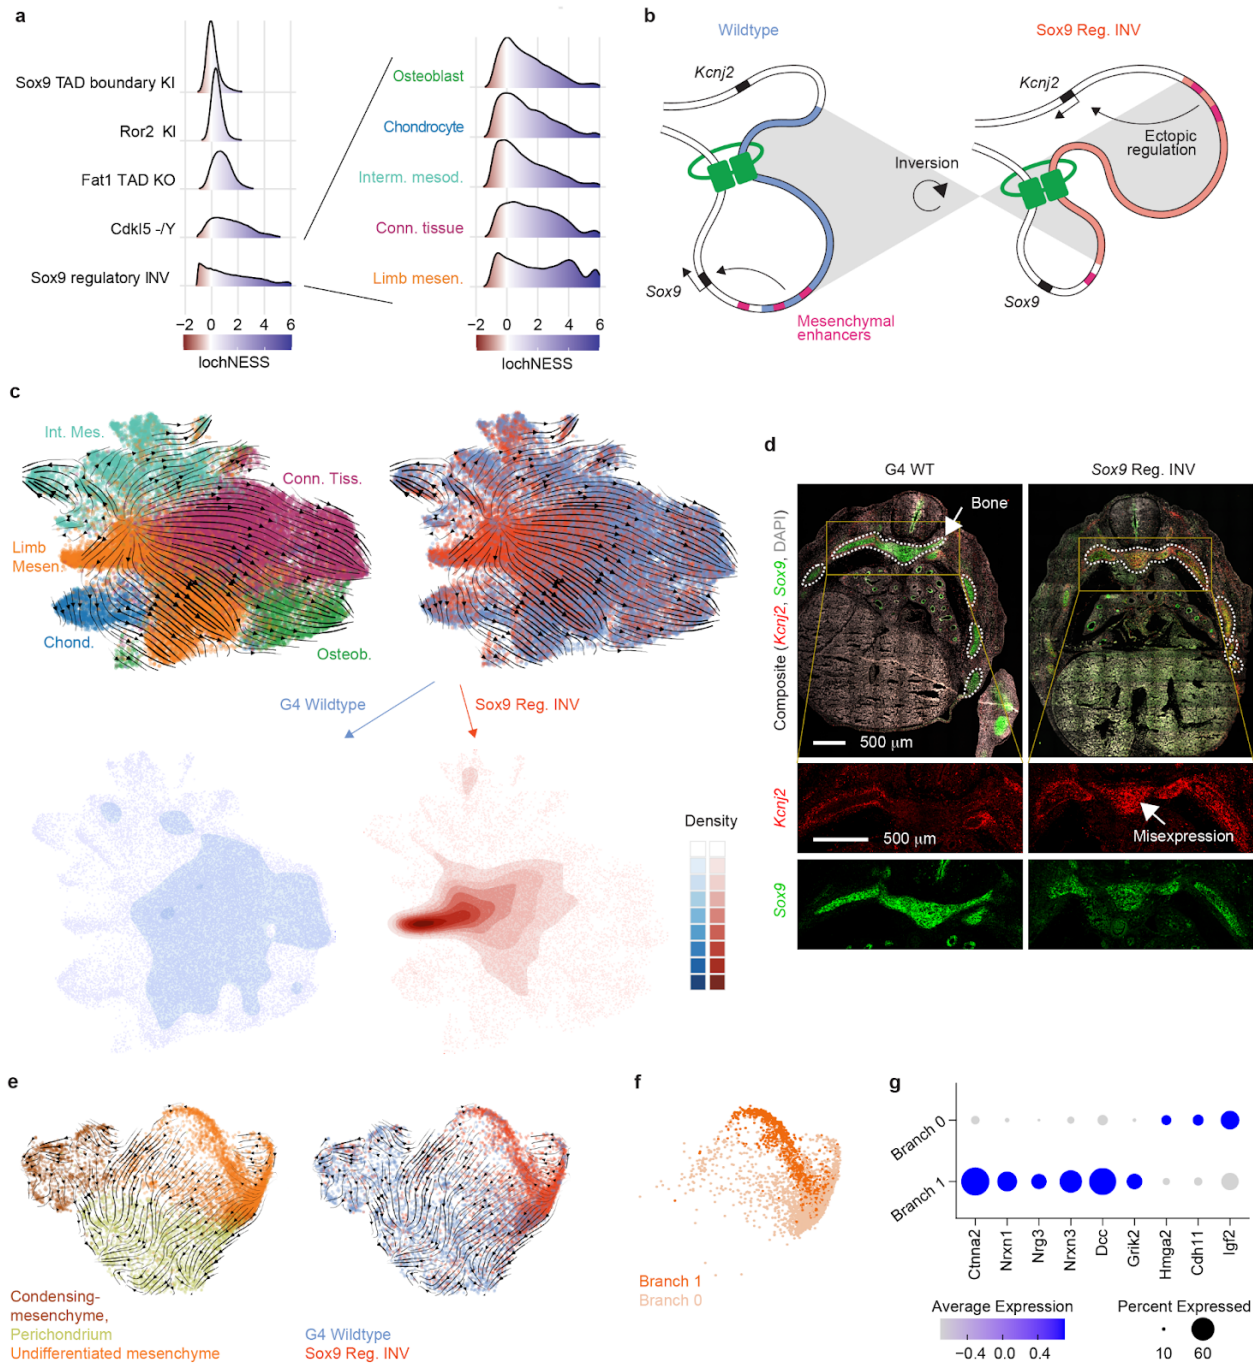

583  
584

585 **Figure 4. Apparent stalling and redirection of mesenchyme differentiation in the Sox9 regulatory**  
 586 **INV mutant. a**, LochNESS distributions for all G4 mutants in the mesenchymal trajectory (left) and the Sox9  
 587 regulatory INV mutant in mesenchymal sub-trajectories (right). **b**, Model of Sox9 regulatory INV mutation  
 588 depicting ectopic *Kcnj2* expression due to adoption of chondrogenesis and osteogenesis specific  
 589 enhancers. **c**, top: RNA velocity on UMAP embedding of mesenchymal G4 wildtype and Sox9 regulatory  
 590 INV cells labelled by annotation (left) or sample (right). bottom: 2D density plots of the same UMAP  
 591 embedding for G4 wildtype (left) and Sox9 regulatory INV cells (right). **d**, Sox9 regulatory INV heterozygous  
 592 mutant and littermate wildtype RNA scope images (red: *Kcnj2*; green: *Sox9*), with insets below highlighting  
 593 a region corresponding to developing bone (white circled area) **e**, RNA velocity on UMAP embedding of G4

594 wildtype and Sox9 regulatory INV cells in the limb mesenchymal trajectory labelled by annotation (left) or  
595 sample (right). **f.** UMAP embedding of Sox9 regulatory INV cells in the undifferentiated mesenchyme,  
596 visualised in the same embedding as in panel **e.** **g.** Dot plot of the top six (where available) significantly  
597 differentially expressed genes between the two branches.  
598



## 599 Discussion

600

601 In this study, we set out to establish whole embryo sc-RNA-seq as a new paradigm for the  
602 systematic, scalable phenotyping of mouse developmental mutants. In one experiment, we  
603 generated ~1.6M single cell transcriptomes from just over 100 E13.5 embryos corresponding to  
604 22 mutant genotypes and 4 wildtype strains. To investigate the resulting dataset, we developed  
605 analytical approaches to identify deviations in cell type composition, subtle differences in gene  
606 expression within cell types (“lochNESS”), and sharing of sub-phenotypes between mutants  
607 (“similarity scores”). We also evaluated how a range of gross phenotypic severities manifest at  
608 the molecular and cellular levels, and show how global analysis can in some cases reveal  
609 molecular and cellular phenotypes that may be missed by conventional phenotyping. Such “*in*  
610 *silico* developmental biology”, wherein global profiles of developmental mutants are subjected to  
611 systematic, outcome-agnostic computational analyses, may complement and guide conventional  
612 phenotyping, which can be impractical to scale to all physiological systems even for a single  
613 mutant.

614

615 We emphasise that the concurrent analysis of many mutants proved essential to the  
616 contextualization of particular observations, *i.e.* to understand how specific or non-specific any  
617 apparent deviation really was, against a background of dozens of genotypes and over 100  
618 embryos. This aspect of the study also enabled us to discover shared aspects of phenotypes  
619 between previously unrelated genotypes, *e.g.* between *Gorab* and *Atp6v0a2* mutants. Looking  
620 forward, profiling of additional mouse mutants might enable the further “decomposition” of  
621 developmental pleiotropy, a poorly understood phenomenon, into “basis vectors” (*e.g.* the stalling  
622 of undifferentiated mesenchyme in 4 of 22 mutants examined).

623

624 Our mouse mutant cell atlas (MMCA) has limitations. First, we only profiled 4 replicates per mutant  
625 at a single developmental time point. We can't exclude that some subtle effects were missed that  
626 might have been captured through profiling of a larger number of replicate embryos. Second, we  
627 profiled only ~15,000 cells per embryo, which is only a small fraction of the millions of cells that  
628 are present in E13.5 embryos, which may also have limited sensitivity. A counterweight to these  
629 limitations is that for any given mutant, we had over 1.5M cells from other genotypes (wildtype or  
630 other mutants), which facilitated the detection of mutant-specific phenotypes for even rare cell  
631 types, *e.g.* in the retina (*Ttc21b* KO) and roof plate (*Gli2* KO).

632

633 Third, although we performed more detailed *in silico* analyses of selected mutants and  
634 phenotypes, we were not able to explore all mutants in detail, nor to thoroughly investigate other  
635 aspects of the data (*e.g.* the differences between wildtype strains). Even for these 22 mutants,  
636 but also looking to the future, we anticipate the community input and domain expertise will be  
637 essential to extract full value from these data, including the development of additional analytical  
638 strategies. To facilitate this, we created an interactive browser that allows exploration of mutant-  
639 specific effects on gene expression in trajectories and sub-trajectories, together with the  
640 underlying data ([https://atlas.gs.washington.edu/mmca\\_v2/](https://atlas.gs.washington.edu/mmca_v2/)).

641



642 In 2011, the International Mouse Phenotyping Consortium (IMPC) set out to drive towards the  
643 “functionalization” of every protein-coding gene in the mouse, by generating thousands of  
644 knockout mouse lines<sup>92</sup>. Although over 7,000 lines have already been analysed, thousands more  
645 still await phenotyping, and even what phenotyping has been done is not necessarily  
646 comprehensive<sup>93</sup>. In principle, the whole embryo sc-RNA-seq phenotyping approach presented  
647 here could be extended to all Mendelian genes or even to all 20,000 mouse gene KOs, to advance  
648 our understanding of the molecular and cellular basis of human developmental disorders, to  
649 decompose pleiotropy, and to shed light on the function(s) of mammalian genes.  
650

651 **Methods**

652

653 **Data reporting**

654

655 No statistical methods were used to predetermine sample size. Embryos used in experiments  
656 were randomised before sample preparation. Investigators were blinded to group allocation during  
657 data collection and analysis. Embryo collection and sci-RNA-seq3 analysis were performed by  
658 different researchers in different locations.

659

660 **Embryo collection**

661

662 Mutants were generated through conventional gene editing tools and breeding or tetraploid  
663 aggregation and collected at the embryonic stage E13.5, calculated from the day of vaginal plug  
664 (noon = E0.5). Collection and whole embryo dissection was performed as previously described<sup>94</sup>.  
665 The embryos were immediately snap-frozen in liquid nitrogen and shipped to the Shendure Lab  
666 (University of Washington) in dry ice. Sets of animals with the same genotype were either all male  
667 or half male-half female. All animal procedures were in accordance with institutional, state, and  
668 government regulations.

669

670 **Nuclei isolation and fixation**

671

672 Snap frozen embryos were processed as previously described<sup>17</sup>. Briefly, the frozen embryos were  
673 cut into small pieces with a blade and further dissected by resuspension in 1 ml ice cold cell lysis  
674 buffer (CLB, 10 mM Tris-HCl, pH 7.4, 10 mM NaCl, 3 mM MgCl<sub>2</sub>, 0.1% IGEPAL CA-630, 1%  
675 SUPERase In and 1% BSA) in a 6 cm dish. adding another 3ml CLB, the sample was strained  
676 (40 µm) into a 15 ml Falcon tube and centrifuged to a pellet (500g, 5 min). Resuspending the  
677 sample with another 1 ml CLB, the isolation of nuclei was ensured. Pelleting the isolated nuclei  
678 again (500g, 5 min) was followed by a washing step by fixation in 10 ml 4% Paraformaldehyde  
679 (PFA) for 15 minutes on ice. The fixed nuclei were pelleted (500g, 3 min) and washed twice in the  
680 nuclei suspension buffer (NSB) (500g, 5 min). The nuclei finally were resuspended in 500µl NSB  
681 and split into 2 tubes, each containing 250 µl sample. The tubes were flash frozen in liquid nitrogen  
682 and stored in a -80°C freezer, until further use for library preparation. The embryo preparation  
683 was preceded randomly for nuclei isolation in order to avoid batch effects.

684

685 **sci-RNA-seq3 library preparation and sequencing**

686

687 The library preparation was performed previously described<sup>17,95</sup>. In short, the fixed nuclei were  
688 permeabilized, sonicated and washed. Nuclei from each mouse embryo were then distributed into  
689 several individual wells into 4 96-well plates. We split samples into four batches (~25 samples  
690 randomly selected in each batch) for sci-RNA-seq3 processing. The ID of the reverse transcription  
691 well was linked to the respective embryo for downstream analysis. In a first step the nuclei were  
692 then mixed with oligo-dT primers and dNTP mix, denatured and placed on ice, afterwards they  
693 were proceeded for reverse transcription including a gradient incubation step. After reverse  
694 transcription, the nuclei from all wells were pooled with the nuclei dilution buffer (10 mM Tris-HCl,

695 pH 7.4, 10 mM NaCl, 3 mM MgCl<sub>2</sub>, 1% SUPERase In and 1% BSA), spun down and redistributed  
696 into 96-well plates containing the reaction mix for ligation. The ligation proceeded for 10 min at  
697 25°C. Afterwards, nuclei again were pooled with nuclei suspension buffer, spun down and washed  
698 and filtered. Next, the nuclei were counted and redistributed for second strand synthesis, which  
699 was carried out at 16°C for 3h. Afterwards tagmentation mix was added to each well and  
700 tagmentation was carried out for 5 minutes at 55°C. To stop the reaction, DNA binding buffer was  
701 added and the sample was incubated for another 5 minutes. Following an elution step using  
702 AMPure XP beads and elution mix, the samples were subjected to PCR amplification to generate  
703 sequencing libraries.

704

705 Finally after PCR amplification, the resulting amplicons were pooled and purified using AMPure  
706 XP beads. The library was analysed by electrophoresis and the concentration was calculated  
707 using Qubit (Invitrogen). The library was sequenced on the NovaSeq platform (Illumina) (read 1:  
708 34 cycles, read 2: 100 cycles, index 1: 10 cycles, index 2: 10 cycles).

709

#### 710 Processing of sequencing reads

711

712 Read alignment and cell-x-gene expression count matrix generation was performed based on the  
713 pipeline that we developed for sci-RNA-seq<sup>317</sup> with the following minor modifications: base calls  
714 were converted to fastq format using Illumina's *bcl2fastq/v2.20* and demultiplexed based on PCR  
715 i5 and i7 barcodes using maximum likelihood demultiplexing package *deML*<sup>96</sup> with default settings.  
716 Downstream sequence processing and cell-x-gene expression count matrix generation were  
717 similar to sci-RNA-seq<sup>97</sup> except that the RT index was combined with hairpin adaptor index, and  
718 thus the mapped reads were split into constituent cellular indices by demultiplexing reads using  
719 both the the RT index and ligation index (Levenshtein edit distance (ED) < 2, including insertions  
720 and deletions). Briefly, demultiplexed reads were filtered based on the RT index and ligation index  
721 (ED < 2, including insertions and deletions) and adaptor-clipped using *trim\_galore/v0.6.5* with  
722 default settings. Trimmed reads were mapped to the mouse reference genome (mm10), using  
723 *STAR/v2.6.1d*<sup>98</sup> with default settings and gene annotations (GENCODE VM12 for mouse).  
724 Uniquely mapping reads were extracted, and duplicates were removed using the unique  
725 molecular identifier (UMI) sequence (ED < 2, including insertions and deletions), reverse  
726 transcription (RT) index, hairpin ligation adaptor index and read 2 end-coordinate (*i.e.* reads with  
727 UMI sequence less than 2 edit distance, RT index, ligation adaptor index and tagmentation site  
728 were considered duplicates). Finally, mapped reads were split into constituent cellular indices by  
729 further demultiplexing reads using the RT index and ligation hairpin (ED < 2, including insertions  
730 and deletions). To generate the cell-x-gene expression count matrix, we calculated the number  
731 of strand-specific UMIs for each cell mapping to the exonic and intronic regions of each gene with  
732 *python/v2.7.13 HTseq* package<sup>99</sup>. For multi-mapped reads, reads were assigned to the closest  
733 gene, except in cases where another intersected gene fell within 100 bp to the end of the closest  
734 gene, in which case the read was discarded. For most analyses, we included both expected-  
735 strand intronic and exonic UMIs in the cell-x-gene expression count matrix.

736

737 The single cell gene count matrix included 1,941,605 cells after cells with low quality (UMI <= 250  
738 or detected gene <= 100) were filtered out. Each cell was assigned to its original mouse embryo

739 on the basis of the reverse transcription barcode. We applied three strategies to detect potential  
740 doublet cells. As the first strategy, we split the dataset into subsets for each individual, and then  
741 applied the *scrublet/v0.1* pipeline<sup>100</sup> to each subset with parameters (min\_count = 3, min\_cells =  
742 3, vscore\_percentile = 85, n\_pc = 30, expected\_doublet\_rate = 0.06, sim\_doublet\_ratio = 2,  
743 n\_neighbors = 30, scaling\_method = 'log') for doublet score calculation. Cells with doublet scores  
744 over 0.2 were annotated as detected doublets (5.5% in the whole data set).

745  
746 As the second strategy, we used an iterative clustering strategy based on *Seurat/v3*<sup>101</sup> to detect  
747 the doublet-derived subclusters for cells. Briefly, gene count mapping to sex chromosomes was  
748 removed before clustering and dimensionality reduction, and then genes with no count were  
749 filtered out and each cell was normalized by the total UMI count per cell. The top 1,000 genes  
750 with the highest variance were selected. The data was log transformed after adding a pseudo  
751 count, and scaled to unit variance and zero mean. The dimensionality of the data was reduced  
752 by PCA (30 components) first and then with UMAP, followed by Louvain clustering performed on  
753 the 10 principal components (resolution = 1.2). For Louvain clustering, we first fitted the top 10  
754 PCs to compute a neighbourhood graph of observations (k.param = 50) followed by clustering the  
755 cells into sub-groups using the Louvain algorithm. For UMAP visualisation, we directly fit the PCA  
756 matrix with min\_distance = 0.1. For subcluster identification, we selected cells in each major cell  
757 type and applied PCA, UMAP, Louvain clustering similarly to the major cluster analysis.  
758 Subclusters with a detected doublet ratio (by *Scrublet*) over 15% were annotated as doublet-  
759 derived subclusters.

760  
761 We found the above *Scrublet* and iterative clustering-based approach is limited in marking cell  
762 doublets between abundant cell clusters and rare cell clusters (e.g. less than 1% of the total cell  
763 population), thus, we applied a third strategy to further detect such doublet cells. Briefly, cells  
764 labeled as doublets (by *Scrublet*) or from doublet-derived subclusters were filtered out. For each  
765 cell, we only retain protein-coding genes, lincRNA genes, and pseudogenes. Genes expressed  
766 in less than 10 cells and cells expressing less than 100 genes were further filtered out. The  
767 downstream dimension reduction and clustering analysis were done with *Monocle/v3*<sup>17</sup>. The  
768 dimensionality of the data was reduced by PCA (50 components) first on the top 5,000 most highly  
769 variable genes and then with UMAP (max\_components = 2, n\_neighbors = 50, min\_dist = 0.1,  
770 metric = 'cosine'). Cell clusters were identified using the Leiden algorithm implemented in  
771 *Monocle/v3* (resolution = 1e-06). Next, we took the cell clusters identified by *Monocle/v3* and first  
772 computed differentially expressed genes across cell clusters with the *top\_markers* function of  
773 *Monocle/v3* (reference\_cells=1000). We then selected a gene set combining the top ten gene  
774 markers for each cell cluster (filtering out genes with fraction\_expressing < 0.1 and then ordering  
775 by pseudo\_R2). Cells from each main cell cluster were selected for dimension reduction by PCA  
776 (10 components) first on the selected gene set of top cluster-specific gene markers, and then by  
777 UMAP (max\_components = 2, n\_neighbors = 50, min\_dist = 0.1, metric = 'cosine'), followed by  
778 clustering identification using the Leiden algorithm implemented in *Monocle/v3* (resolution = 1e-  
779 04). Subclusters showing low expression of target cell cluster-specific markers and enriched  
780 expression of non-target cell cluster-specific markers were annotated as doublets derived  
781 subclusters and filtered out in visualisation and downstream analysis. Finally, after removing the

782 potential doublet cells detected by either of the above three strategies, 1,671,270 cells were  
783 retained for further analyses.

784

#### 785 Whole mouse embryo analysis

786

787 As described previously<sup>17</sup>, each cell could be assigned to the mouse embryo from which it derived  
788 on the basis of its reverse transcription barcode. After removing doublet cells and another 25 cells  
789 which were poorly assigned to any mouse embryo, 1,671,245 cells from 103 individual mouse  
790 embryos were retained (a median of 13,468 cells per embryo). UMI counts mapping to each  
791 sample were aggregated to generate a pseudobulk RNA-seq profile for each sample. Each cell's  
792 counts were normalised by dividing its estimated size factor, and then the data were log2-  
793 transformed after adding a pseudocount followed by performing the PCA. The normalisation and  
794 dimension reduction were done in *Monocle/v3*.

795

796 We previously used sci-RNA-seq3 to generate the MOCA dataset, which profiled ~2 million cells  
797 derived from 61 wild-type B6 mouse embryos staged between stages E9.5 and E13.5. The  
798 cleaned dataset, including 1,331,984 high quality cells, was generated by removing cells with  
799 <400 detected UMIs as well as doublets (<http://atlas.gs.washington.edu/mouse-rna>). UMI counts  
800 mapping to each sample were aggregated to generate a pseudobulk RNA-seq profile for each  
801 embryo. Each cell's counts were normalised by dividing its estimated size factor, and then the  
802 data were log2-transformed after adding a pseudocount, followed by PCA. The PCA space was  
803 retained and then the embryos from the MMCA dataset were projected onto it.

804

#### 805 Cell clustering and annotation

806

807 After removing doublet cells, genes expressed in less than 10 cells and cells expressing less than  
808 100 genes were further filtered out. We also filtered out low-quality cells based on the proportion  
809 of reads mapping to the mitochondrial genome (MT%) or ribosomal genome (Ribo%) (specifically,  
810 filtering cells with MT% > 10 or Ribo% > 5). We then removed cells from two embryos that were  
811 identified as outliers based on the whole-mouse embryo analysis (embryo 41 and embryo 104).  
812 This left 1,627,857 cells (median UMI count 845; median genes detected 539) from 101 individual  
813 embryos that were retained for all subsequent analyses.

814

815 To eliminate the potential heterogeneity between samples due to different mutant types and  
816 genotype backgrounds, we sought to perform the dimensionality reduction on a subset of cells  
817 from the wildtype mice (including 15 embryos with 215,575 cells, 13.2% of all cells) followed by  
818 projecting all remaining cells, derived from the various mutant embryos, onto this same  
819 embedding. These procedures were done using *Monocle/v3*. In brief, the dimensionality of the  
820 subset of data from the wildtype mice was reduced by PCA, retaining 50 components, and all  
821 remaining cells were projected onto that PCA embedding space. Next, to mitigate potential  
822 technical biases, we combined all cells from wildtype and mutant mice and applied the *align\_cds*  
823 function implemented in *Monocle/v3*, with MT%, Ribo%, and log-transformed total UMI of each  
824 cell as covariates. We took the subset of cells from wildtype mice, using their "aligned" PC features  
825 to perform UMAP (max\_components = 3, n\_neighbors = 50, min\_dist = 0.01, metric = 'cosine') by



826 *uwot/v0.1.8*, followed by saving the UMAP space. Cell clusters were identified using the Louvain  
827 algorithm implemented in *Monocle/v3* on three dimensions of UMAP features, resulting in 13  
828 isolated major trajectories (**Fig. 1e**). We then projected all of the remaining cells from mutant  
829 mouse embryos onto the previously saved UMAP space and predicted their major-trajectory  
830 labels using a *k*-nearest neighbour (*k*-NN) heuristic. Specifically, for each mutant-derived cell, we  
831 identified its 15 nearest neighbour wildtype-derived cells in UMAP space and then assigned the  
832 major trajectory with the maximum frequency within that set of 15 neighbours as the annotation  
833 of the mutant cell. We calculated the ratio of the maximum frequency to the total as the assigned  
834 score. Of note, over 99.9% of the cells from the mutant mice had an assigned score greater than  
835 0.8. The cell-type annotation for each major trajectory was based on expression of the known  
836 marker genes (**Supplementary Table 2**).

837  
838 Within each major trajectory, we repeated a similar strategy, but with slightly adjusted PCA and  
839 UMAP parameters. For the major trajectories with more than 50,000 cells, we reduced the  
840 dimensionality by PCA to 50 principal components; for the other major trajectories of more than  
841 1,000 cells, we reduced the dimensionality by PCA to 30 principal components; for the remaining  
842 major trajectories, we reduced the dimensionality by PCA to 10 principal components. UMAP was  
843 performing with `max_components = 3`, `n_neighbors = 15`, `min_dist = 0.1`, `metric = 'cosine'`. For  
844 the mesenchymal trajectory, we observed a significant separation of cells by their cell-cycle phase  
845 in the UMAP embedding. We calculated a *g2m* index and a *s* index for individual cells by  
846 aggregating the log-transformed normalised expression for marker genes of the G2M phase and  
847 the S phase and then included them in *align\_cds* function along with the other factors. Applying  
848 these procedures to all of the main trajectories, we identified 64 sub trajectories in total. Similarly,  
849 after assigning each cell from the mutant mice with a sub-trajectory label, we calculated the ratio  
850 of the maximum frequency to the total as the assigned score. Of note, over 96.7% of the cells  
851 from the mutant mice had an assigned score greater than 0.8. The cell-type annotation for each  
852 sub-trajectory was also based on the expression of known marker genes (**Supplementary Table  
853 2**).

854  
855 Identification of inter-datasets correlated major and sub trajectories using non-negative least-  
856 squares (NNLS) regression

857  
858 To identify correlated cell trajectories between MOCA and MMCA datasets, we first calculated an  
859 aggregate expression value for each gene in each cell trajectory by summing the log-transformed  
860 normalised UMI counts of all cells of that trajectory. For consistency during the comparison to  
861 MOCA, we manually regrouped the cells from the MMCA dataset into 10 cell trajectories, by  
862 merging the olfactory sensory neuron trajectory into the neural crest (PNS neuron) trajectory,  
863 merging the myotube trajectory, the myoblast trajectory, and the cardiomyocyte trajectory into the  
864 mesenchymal trajectory, splitting the hepatocyte trajectory into the lens epithelial trajectory and  
865 the liver hepatocyte trajectory. Next, for the two datasets, we applied non-negative least squares  
866 (NNLS) regression to predict gene expression in a target trajectory ( $T_a$ ) in dataset A based on the  
867 gene expression of all trajectories ( $M_b$ ) in dataset B:  $T_a = \beta_{0a} + \beta_{1a}M_b$ , based on the union of the  
868 3,000 most highly expressed genes and 3,000 most highly specific genes in the target trajectory.  
869 We then switched the roles of datasets A and B, *i.e.* predicting the gene expression of target



870 trajectory ( $T_b$ ) in dataset B from the gene expression of all trajectories ( $M_a$ ) in dataset A:  $T_b = \beta_{0b}$   
871  $+ \beta_{1b}M_a$ . Finally, for each trajectory  $a$  in dataset A and each trajectory  $b$  in dataset B, we combined  
872 the two correlation coefficients:  $\beta = 2(\beta_{ab} + 0.001)(\beta_{ba} + 0.001)$  to obtain a statistic, where high  
873 values reflect reciprocal, specific predictivity. We repeated this analysis on sub-trajectories within  
874 each major trajectories.

875

876 Identification of significant cell composition changes in mutant mice using beta-binomial  
877 regression

878

879 A cell number matrix of all 64 developmental sub-trajectories (*rows*) and 101 embryos (*columns*)  
880 was created and the cell number were then normalised by the size factor of each column which  
881 was estimated by *estimate\_size\_factors* function in *Monocle/v3*. 10 sub-trajectories with a mean  
882 of cell number across individual embryo  $< 10$  were filtered out. The beta-binomial regression was  
883 performed using the *VGAM* package of *R*, based on the model “(trajectory specific cell number,  
884 total cell number of that embryo - trajectory specific cell number)  $\sim$  genotype”. Of note, embryos  
885 from the four different mouse strain backgrounds were analysed independently.

886

887 Defining and calculating lochNESS

888

889 To identify local enrichments or depletions of mutant cells, we aim to define a metric for each  
890 single cell to quantify the enrichments or depletions of mutant cells in its surrounding  
891 neighbourhood. For these analyses, we consider a mutant and a pooled wildtype combining all 4  
892 background strains in a main trajectory as a dataset. For each dataset, we define “lochNESS” as:

$$893 \text{lochNESS} = \frac{\# \text{ of mutant cells in } k\text{NNs}}{k} / \frac{\# \text{ of mutant cells in dataset}}{N} - 1$$

894 Where  $N$  is the total number of cells in the dataset,  $k = \frac{\sqrt{N}}{2}$  scales with  $N$  and the cells from the  
895 same embryo as the cell are excluded from the  $k$ -NNs. Note that this value is equivalent to the  
896 fold change of mutant cell percentage in the neighbourhood of a cell relative to in the whole main  
897 trajectory. For implementation, we took the aligned PCs in each sub-trajectory as calculated  
898 above and for each cell in an embryo we find the  $k$ -NNs in the remaining mutant embryo cells and  
899 wildtype cells. We plot the lochNESS in a red-white-blue scale, where white corresponds to 0 or  
900 the median lochNESS, blue corresponds to high lochNESS or enrichments, and red corresponds  
901 to low lochNESS or depletions. For reference, we simultaneously create a null distribution of  
902 lochNESS using random permutation of the mutant and wildtype cell labels, simulating datasets  
903 in which the cells are randomly mixed.

904

905 Identifying lochNESS associated gene expression changes

906

907 To identify gene expression changes associated with mutant enriched or depleted areas, we find  
908 differentially expressed genes through fitting a regression model for each gene accounting for  
909 lochNESS. We use the *fit\_models()* function implemented in *monocle/v3* with lochNESS as the  
910 *model\_formula\_str*. This essentially fits a generalized linear model for each gene:  $\log(y_i) = \beta_0 +$   
911  $\beta_n * x_n$ , where  $y_i$  is the gene expression of  $gene_i$ ,  $\beta_n$  captures the effect of the lochNESS  $x_n$  on  
912 expression of  $gene_i$  and  $\beta_0$  is the intercept. For each  $gene_i$ , we test if  $\beta_i$  is significantly different

913 from zero using a Wald test and after testing all genes, we adjust the p-values using the Benjamini  
914 and Hochberg procedure to account for multiple hypotheses testing. We identify the genes that  
915 have adjusted p-value<0.05 and large positive  $\beta_i$  values as associated with mutant enriched  
916 areas, and those with large negative  $\beta_i$  values as associated with mutant depleted areas.

917

#### 918 Calculating mutant and embryo similarity scores

919

920 We can extend the lochNESS analysis, which is computed on each mutant and its corresponding  
921 wildtype mice, to compute “similarity scores” between all pairs of individual embryos from the  
922 same background strain. We consider all embryos in the same background in a main trajectory  
923 as a dataset. For each dataset, we take define a “similarity score” between  $cell_n$  and  $embryo_j$  as:

$$924 \text{ similarity score}_{cell_n, embryo_j} = \frac{\# \text{ of cells from embryo}_i \text{ in kNNs of } cell_n}{k} / \frac{\# \text{ of cells from embryo}_j \text{ in dataset}}{N}$$

925 Where  $N$  is the total number of cells in the dataset and  $k = \frac{\sqrt{N}}{2}$ . We take the mean of the similarity  
926 scores across all cells in the same embryo, resulting in an embryo similarity score matrix where  
927 entries are:

$$928 \text{ similarity score}_{embryo_i, embryo_j} = \frac{1}{n_i} \sum_{n=1}^{n_i} \text{ similarity score}_{cell_n, embryo_j}$$

929 Where  $n_i$  is the number of cells in  $embryo_i$ . The embryo similarity score matrix can be visualised  
930 in a square heatmap where rows and/or columns are hierarchically clustered.

931

#### 932 Identifying and quantifying developmental delay

933

934 To identify potential mutant related developmental delay, we integrate MMCA with MOCA. We  
935 consider a mutant and its corresponding wildtype in a sub trajectory as a dataset. We take the  
936 cells from E11.5-E13.5 with similar annotations from MOCA and co-embed with the MMCA cells.  
937 We take the raw counts from both datasets, normalise, and process the data together without  
938 explicit batch correction as both datasets were generated with sci-RNA-seq3 and were similar in  
939 dataset quality. We visualise the co-embedded data in 3D UMAP space and check for  
940 developmental delay in the mutant cells (*i.e.* mutant cells embedded closer to early MOCA cells  
941 compared to wildtype cells). To quantify the amount of developmental delay, we find k-NNs in

942 MOCA for each cell in MMCA and calculate  $time\ score = \frac{\sum_{n=1}^k T_n}{k}$ , where  $T_n$  is the developmental  
943 time of MOCA  $cell_n$  in the k-NNs of the MMCA cell. Afterwards, we test if the average time scores  
944 of mutant cells are significantly different from that of wildtype cells using a student’s t-test.

945

#### 946 RNAscope *in situ* Hybridization

947

948 For RNAscope, embryos were collected at stage E13.5 and fixed for 4 hours in 4% PFA/PBS at  
949 room temperature. The embryos were washed twice in PBS before incubation in a sucrose series  
950 (5%, 10% and finally 15% sucrose (Roth) /PBS) each for an hour or until the embryos sank to the  
951 bottom of the tube. Finally, the embryos were incubated in 15% sucrose/PBS and O.C.T. (Sakura)  
952 in a 1:1 solution before embedding the embryos in O.C.T in a chilled ethanol bath and put into -  
953 80°C for sectioning. The embryos were cut into 5  $\mu$ m thick sections on slides for RNAscope.

954

955 Simultaneous RNA *in situ* hybridization was performed using the RNAscope® technology  
956 (Advanced Cell Diagnostics [ACD]) and the following probes specific for Mm-Kcnj2 (Cat. No.  
957 476261, ACD) and Mm-Sox9 (Cat. No. 401051-C2, ACD) on five µm sections of the mouse  
958 embryos. RNAscope probes were purchased by ACD and designed as described by Wang *et*  
959 *al.*<sup>102</sup>. The RNAscope® assay was run on a HybEZ™II Hybridization System (Cat. No. 321720,  
960 ACD) using the RNAscope® Multiplex Fluorescent Reagent Kit v2 (Cat. No. 323100, ACD) and  
961 the manufacturer's protocol for fixed-frozen tissue samples with target retrieval on a hotplate for  
962 5 minutes. Fluorescent labelling of the RNAscope® probes was achieved by using OPAL 520 and  
963 OPAL 570 dyes (Cat. No. FP1487001KT + Cat. No. FP1488001KT, Akoya Biosciences,  
964 Marlborough, MA, USA) and stained sections were scanned at 25x magnification using a LSM  
965 980 with Airyscan 2 (Carl Zeiss AG, Oberkochen, DE).

966

#### 967 Image analysis

968

969 For quantitative analysis of the RNAscope images, representative fields of view for each stained  
970 section were analysed using the image processing software Fiji<sup>103</sup>. Each organ of interest mRNA  
971 signal was counted in a defined area (1 x 1 mm<sup>2</sup>) with an n=6 per condition. Statistics were  
972 calculated using student t-Test and evaluated (- p > 0,05 = non-significant, p < 0,05 - ≥ 0,01 = \* ,  
973 p < 0,01 - ≥ 0,001= \*\* - p < 0,001= \*\*\*).

974

#### 975 Clustering and annotation limb mesenchyme trajectory

976

977 *Seurat/v4.0.6* was used for the analysis. Wildtype cells in the limb mesenchyme trajectory from  
978 all wild-type mice (n = 15 mice, n = 25,211 cells) were used to first annotate the cells. The raw  
979 counts were log-normalised after which PCA was performed with default parameters on top 2000  
980 highly variable genes selected using the “vst” method. Nearest neighbours were computed on the  
981 PCA space, with default parameters, except that all the principal components computed earlier  
982 were used. Clustering was performed using the Louvain community detection algorithm with a  
983 resolution of 0.1, resulting in three clusters. Positive marker genes for these clusters were  
984 identified using the Wilcoxon Rank Sum test, where only the genes expressed in at least 20% of  
985 the cells in either cell groups were considered. The clusters were annotated based on biologically  
986 relevant markers (**Supplementary Fig. 12b**). The newly assigned cell annotations for the Limb  
987 mesenchyme trajectory cells in the wildtype dataset were transferred to the corresponding cells  
988 in the *Sox9* regulatory INV mutant using the *FindTransferAnchors* and *TransferData* functions  
989 using default parameters, except that all the computed principal components were used. 92.3%  
990 of the transferred annotations had a score (prediction.score.max) greater than or equal to 0.8.

991

#### 992 Density visualization and RNA velocity analysis

993

994 Using *Seurat/v4.0.6*, the raw counts were log-normalised, and PCA was performed with default  
995 parameters on top highly variable genes 2000 genes, selected using the “vst” method.  
996 Dimensionality reduction was performed using PCA using default parameters, after which the  
997 UMAP embedding was carried out on all computed PC components. Density plots were created  
998 using the *stat\_2d\_density\_filled* function in *ggplot2/v3.3.5*. For RNA velocity analysis using

999 *scVelo/v0.2.4*, the total, spliced, and unspliced count matrices, along with the UMAP embeddings  
1000 were exported as an h5ad file using *anndata/v0.7.5.2* for R. The count matrices were filtered and  
1001 normalised using *scv.pp.filter\_and\_normalize*, with *min\_shared\_counts=20* and  
1002 *n\_top\_genes=2000*. Means and variances between 30 nearest neighbours were calculated in the  
1003 PCA space (*n\_pcs=50*, to be consistent with default value in *Seurat*). The velocities were  
1004 calculated using default parameters and projected onto the UMAP embedding exported from  
1005 *Seurat*.

### 1007 Single sample Gene Set Enrichment Analysis

1008  
1009 Single-sample Gene Set Enrichment Analysis (ssGSEA) was applied to sc-RNA-seq data using  
1010 the *escape* R-package<sup>84</sup>. The *msigdb* and *getGeneSets* functions were used to fetch and filter  
1011 the entire Hallmark (H, 50 sets) or the Signature Cell Type (C8, 700 sets) *Mus musculus* gene  
1012 sets from the MSigDB<sup>104,105</sup>. *enrichIt* with default parameters, except for using 10000 groups and  
1013 variable number of cores, was performed on the *seurat*-object containing data corresponding to  
1014 the undifferentiated mesenchyme cells from the *Sox9* regulatory INV mutant, after converting the  
1015 feature names to gene symbols as necessitated by the *escape* package. The obtained enrichment  
1016 scores for each gene set were compared between the two branches (**Fig. 4f**) using the two sample  
1017 Wilcoxon test (*wilcox\_test*) with default parameters and adjusted for multiple comparisons using  
1018 Bonferroni correction.

### 1020 Data availability

1021  
1022 The data generated in this study can be downloaded in raw and processed forms from the NCBI  
1023 Gene Expression Omnibus under accession number GSE199308. Other intermediate data files,  
1024 code and an interactive app to explore our dataset will be made freely available via  
1025 [https://atlas.gs.washington.edu/mmca\\_v2/](https://atlas.gs.washington.edu/mmca_v2/).

### 1027 Code availability

1028  
1029 All code will be made freely available through a public GitHub repository.

### 1031 Acknowledgements

1032  
1033 We thank Stefan Mundlos and Cesar Prada for helpful discussions around data processing and  
1034 analysis and results interpretation, as well as all members of the Cao, Shendure, Spielmann labs  
1035 for continuous support and helpful input. N.Haag and I.K. thank Matthias Ebbinghaus for help with  
1036 breeding of *Scn11a* GOF mice. We thank Vanessa Suckow for genotyping the *Ror2* KI and *Cdkl5*  
1037 *-Y* mice. We thank Scott Houghtaling and Tzu-Hua Ho for breeding and embryo harvest of  
1038 *Ttc21b*, *Carm1* and *Gli2* mice. X.H. thanks Gwen the Cat for support and cheer ups during  
1039 meetings. J.S. and work in the Shendure Lab was supported by the Paul G. Allen Frontiers  
1040 Foundation (Allen Discovery Center grant to J.S. and C.T.), the National Institutes of Health (grant  
1041 UM1HG011531 to J.S.), Alex's Lemonade Stand's Crazy 8 Initiative (to J.S.) and the Bonita and  
1042 David Brewer Fellowship (C.Q.). Work at the E.O. Lawrence Berkeley National Laboratory was

1043 supported by U.S. National Institutes of Health (NIH) grants to L.A.P. and A.V. (UM1HG009421  
1044 and R01HG003988) and performed under U.S. Department of Energy Contract DE-AC02-  
1045 05CH11231, University of California. J.S. is an Investigator of the Howard Hughes Medical  
1046 Institute. M.S. is a DZHK principal investigator and is supported by grants from the Deutsche  
1047 Forschungsgemeinschaft (DFG) (SP1532/3-1, SP1532/4-1, and SP1532/5-1) and the Deutsches  
1048 Zentrum für Luft- und Raumfahrt (DLR 01GM1925). D.R.B was supported by R01HD36404 from  
1049 NICHD. J.C. is supported by the National Institutes of Health (grant DP2 HG012522-01 and  
1050 RM1HG011014) and the Rockefeller University.

1051

### 1052 **Author contributions**

1053

1054 J.C., M.S. and J.S. conceptualized, supervised and funded the project. D.R.B., W.C., A.D., D.E.D.,  
1055 N.Haag, D.I., I.K., F.H., V.M.K., U.K., L.A.P., S.R., A.R., M.R., A.V. L.W. and Y.Z. provided mouse  
1056 embryos. J.C. and J.H. extracted and fixed the nuclei from embryos and performed the sci-RNA-  
1057 seq experiment. S.U., R.B., R.H., N.Hans. and J.H. performed RNAscope experiment and image  
1058 analysis. X.H., C.Q., J.H., V.S. and S.B. performed all computational analyses. C.M. created the  
1059 interactive webpage with guidance from X.H. and J.S. L.S., S.S. and C.T. provided assistance  
1060 with data analysis and results interpretation. X.H., C.Q., J.H. and V.S. wrote the first draft of the  
1061 manuscript, which was finalized together with J.C., M.S. and J.S. and input from all authors.

1062

### 1063 **Competing interests**

1064

1065 J.S. is a SAB member, consultant and/or co-founder of Cajal Neuroscience, Guardant Health,  
1066 Maze Therapeutics, Camp4 Therapeutics, Phase Genomics, Adaptive Biotechnologies and Scale  
1067 Biosciences.

1068



1069 **References**

- 1070 1. Rosenthal, N. & Brown, S. The mouse ascending: perspectives for human-disease models. *Nat. Cell Biol.* **9**,  
1071 993–999 (2007).
- 1072 2. Gurumurthy, C. B. & Lloyd, K. C. K. Generating mouse models for biomedical research: technological advances.  
1073 *Dis. Model. Mech.* **12**, (2019).
- 1074 3. Origins of Inbred Mice. (1978) doi:10.1016/b978-0-12-507850-4.x5001-x.
- 1075 4. Steensma, D. P., Kyle, R. A. & Shampo, M. A. Abbie Lathrop, the ‘mouse woman of Granby’: rodent fancier and  
1076 accidental genetics pioneer. *Mayo Clin. Proc.* **85**, e83 (2010).
- 1077 5. of Molecular Biology Lee M Silver, P. D. & Silver, L. M. *Mouse Genetics: Concepts and Applications*. (Oxford  
1078 University Press on Demand, 1995).
- 1079 6. Ringwald, M. *et al.* The IKMC web portal: a central point of entry to data and resources from the International  
1080 Knockout Mouse Consortium. *Nucleic Acids Res.* **39**, D849–55 (2011).
- 1081 7. Jinek, M. *et al.* A programmable dual-RNA-guided DNA endonuclease in adaptive bacterial immunity. *Science*  
1082 **337**, 816–821 (2012).
- 1083 8. Singh, P., Schimenti, J. C. & Bolcun-Filas, E. A mouse geneticist’s practical guide to CRISPR applications.  
1084 *Genetics* **199**, 1–15 (2015).
- 1085 9. Lupiáñez, D. G. *et al.* Disruptions of topological chromatin domains cause pathogenic rewiring of gene-enhancer  
1086 interactions. *Cell* **161**, 1012–1025 (2015).
- 1087 10. Spielmann, M., Lupiáñez, D. G. & Mundlos, S. Structural variation in the 3D genome. *Nature Reviews Genetics*  
1088 vol. 19 453–467 (2018).
- 1089 11. Otto, F. *et al.* *Cbfa1*, a candidate gene for cleidocranial dysplasia syndrome, is essential for osteoblast  
1090 differentiation and bone development. *Cell* **89**, 765–771 (1997).
- 1091 12. Scambler, P. Faculty Opinions recommendation of Mechanism for the learning deficits in a mouse model of  
1092 neurofibromatosis type 1. *Faculty Opinions – Post-Publication Peer Review of the Biomedical Literature* (2002)  
1093 doi:10.3410/f.1003995.44355.
- 1094 13. Gailus-Durner, V. *et al.* Introducing the German Mouse Clinic: open access platform for standardized  
1095 phenotyping. *Nat. Methods* **2**, 403–404 (2005).
- 1096 14. Dickel, D. E. *et al.* Ultraconserved Enhancers Are Required for Normal Development. *Cell* **172**, 491–499.e15  
1097 (2018).
- 1098 15. Flöttmann, R. *et al.* Noncoding copy-number variations are associated with congenital limb malformation. *Genet.*  
1099 *Med.* **20**, 599–607 (2018).

- 1100 16. Osterwalder, M. *et al.* Enhancer redundancy provides phenotypic robustness in mammalian development. *Nature*  
1101 **554**, 239–243 (2018).
- 1102 17. Cao, J. *et al.* The single-cell transcriptional landscape of mammalian organogenesis. *Nature* **566**, 496–502  
1103 (2019).
- 1104 18. Cheng, S. *et al.* Single-Cell RNA-Seq Reveals Cellular Heterogeneity of Pluripotency Transition and X  
1105 Chromosome Dynamics during Early Mouse Development. *Cell Reports* vol. 26 2593–2607.e3 (2019).
- 1106 19. Mohammed, H. *et al.* Single-Cell Landscape of Transcriptional Heterogeneity and Cell Fate Decisions during  
1107 Mouse Early Gastrulation. *Cell Rep.* **20**, 1215–1228 (2017).
- 1108 20. Pijuan-Sala, B. *et al.* A single-cell molecular map of mouse gastrulation and early organogenesis. *Nature* **566**,  
1109 490–495 (2019).
- 1110 21. Mittnenzweig, M. *et al.* A single-embryo, single-cell time-resolved model for mouse gastrulation. *Cell* **184**, 2825–  
1111 2842.e22 (2021).
- 1112 22. Qiu, C. *et al.* Systematic reconstruction of cellular trajectories across mouse embryogenesis. *Nat. Genet.* **54**,  
1113 328–341 (2022).
- 1114 23. Zhou, Y. *et al.* Human and mouse single-nucleus transcriptomics reveal TREM2-dependent and TREM2-  
1115 independent cellular responses in Alzheimer’s disease. *Nat. Med.* **26**, 131–142 (2020).
- 1116 24. de Soysa, T. Y. *et al.* Single-cell analysis of cardiogenesis reveals basis for organ-level developmental defects.  
1117 *Nature* **572**, 120–124 (2019).
- 1118 25. Zhong, J. *et al.* Single-cell brain atlas of Parkinson’s disease mouse model. *J. Genet. Genomics* **48**, 277–288  
1119 (2021).
- 1120 26. Li, X. *et al.* Single cell RNA sequencing identifies IGFBP5 and QKI as ciliated epithelial cell genes associated  
1121 with severe COPD. *Respir. Res.* **22**, 100 (2021).
- 1122 27. Despang, A. *et al.* Functional dissection of the Sox9-Kcnj2 locus identifies nonessential and instructive roles of  
1123 TAD architecture. *Nat. Genet.* **51**, 1263–1271 (2019).
- 1124 28. Stottmann, R. W., Tran, P. V., Turbe-Doan, A. & Beier, D. R. Ttc21b is required to restrict sonic hedgehog  
1125 activity in the developing mouse forebrain. *Dev. Biol.* **335**, 166–178 (2009).
- 1126 29. Yadav, N. *et al.* Specific protein methylation defects and gene expression perturbations in coactivator-associated  
1127 arginine methyltransferase 1-deficient mice. *Proc. Natl. Acad. Sci. U. S. A.* **100**, 6464–6468 (2003).
- 1128 30. Mo, R. *et al.* Specific and redundant functions of Gli2 and Gli3 zinc finger genes in skeletal patterning and  
1129 development. *Development* **124**, 113–123 (1997).
- 1130 31. Leipold, E. *et al.* A de novo gain-of-function mutation in SCN11A causes loss of pain perception. *Nature Genetics*

- 1131 vol. 45 1399–1404 (2013).
- 1132 32. Schwabe, G. C. *et al.* Ror2 knockout mouse as a model for the developmental pathology of autosomal recessive  
1133 Robinow syndrome. *Dev. Dyn.* **229**, 400–410 (2004).
- 1134 33. Chan, W. L. *et al.* Impaired proteoglycan glycosylation, elevated TGF- $\beta$  signaling, and abnormal osteoblast  
1135 differentiation as the basis for bone fragility in a mouse model for geroderma osteodysplastica. *PLOS Genetics*  
1136 vol. 14 e1007242 (2018).
- 1137 34. Fischer, B. *et al.* Further characterization of ATP6V0A2-related autosomal recessive cutis laxa. *Hum. Genet.*  
1138 **131**, 1761–1773 (2012).
- 1139 35. Ringel, A. R. *et al.* Promoter Repression and 3D-Restructuring Resolves Divergent Developmental Gene  
1140 Expression in TADs. *SSRN Electronic Journal* doi:10.2139/ssrn.3947354.
- 1141 36. Rajderkar, S. *et al.* Topologically Associating Domain Boundaries are Commonly Required for Normal Genome  
1142 Function. doi:10.1101/2021.05.06.443037.
- 1143 37. Kvon, E. Z. *et al.* Progressive Loss of Function in a Limb Enhancer during Snake Evolution. *Cell* vol. 167 633–  
1144 642.e11 (2016).
- 1145 38. Qiu, C. *et al.* Systematic reconstruction of the cellular trajectories of mammalian embryogenesis.  
1146 doi:10.1101/2021.06.08.447626.
- 1147 39. Cao, J. *et al.* A human cell atlas of fetal gene expression. *Science* **370**, (2020).
- 1148 40. Jacob, J. & Briscoe, J. Gli proteins and the control of spinal-cord patterning. *EMBO Rep.* **4**, (2003).
- 1149 41. Nolte, M. J. *et al.* Functional analysis of limb transcriptional enhancers in the mouse. *Evol. Dev.* **16**, 207–223  
1150 (2014).
- 1151 42. Jo, A. *et al.* The versatile functions of Sox9 in development, stem cells, and human diseases. *Genes Dis* **1**, 149–  
1152 161 (2014).
- 1153 43. Gordon, C. T. *et al.* Long-range regulation at the SOX9 locus in development and disease. *J. Med. Genet.* **46**,  
1154 649–656 (2009).
- 1155 44. Tran, P. V. *et al.* THM1 negatively modulates mouse sonic hedgehog signal transduction and affects retrograde  
1156 intraflagellar transport in cilia. *Nat. Genet.* **40**, 403–410 (2008).
- 1157 45. Davis, E. E. *et al.* TTC21B contributes both causal and modifying alleles across the ciliopathy spectrum. *Nat.*  
1158 *Genet.* **43**, 189–196 (2011).
- 1159 46. Kvon, E. Z. *et al.* Progressive Loss of Function in a Limb Enhancer during Snake Evolution. *Cell* **167**, 633–  
1160 642.e11 (2016).
- 1161 47. Sheth, R. *et al.* Distal Limb Patterning Requires Modulation of cis-Regulatory Activities by HOX13. *Cell Rep.* **17**,

- 1162 2913–2926 (2016).
- 1163 48. Capdevila, J., Tsukui, T., Rodríguez Esteban, C., Zappavigna, V. & Izpisua Belmonte, J. C. Control of vertebrate  
1164 limb outgrowth by the proximal factor Meis2 and distal antagonism of BMPs by Gremlin. *Mol. Cell* **4**, 839–849  
1165 (1999).
- 1166 49. Mercader, N. *et al.* Ectopic Meis1 expression in the mouse limb bud alters P-D patterning in a Pbx1-independent  
1167 manner. *Int. J. Dev. Biol.* **53**, 1483–1494 (2009).
- 1168 50. Reginelli, A. D., Wang, Y. Q., Sassoon, D. & Muneoka, K. Digit tip regeneration correlates with regions of Msx1  
1169 (Hox 7) expression in fetal and newborn mice. *Development* **121**, 1065–1076 (1995).
- 1170 51. Tzchori, I. *et al.* LIM homeobox transcription factors integrate signaling events that control three-dimensional limb  
1171 patterning and growth. *Development* **136**, 1375–1385 (2009).
- 1172 52. Dann, E., Henderson, N. C., Teichmann, S. A., Morgan, M. D. & Marioni, J. C. Differential abundance testing on  
1173 single-cell data using k-nearest neighbor graphs. *Nat. Biotechnol.* (2021) doi:10.1038/s41587-021-01033-z.
- 1174 53. Broom, E. R., Gilthorpe, J. D., Butts, T., Campo-Paysaa, F. & Wingate, R. J. T. The roof plate boundary is a bi-  
1175 directional organiser of dorsal neural tube and choroid plexus development. *Development* **139**, 4261–4270  
1176 (2012).
- 1177 54. Revinski, D. R. *et al.* CDC20B is required for deuterosome-mediated centriole production in multiciliated cells.  
1178 *Nat. Commun.* **9**, 4668 (2018).
- 1179 55. Terré, B. *et al.* Defects in efferent duct multiciliogenesis underlie male infertility in GEMC1-, MCIDAS- or CCNO-  
1180 deficient mice. *Development* **146**, (2019).
- 1181 56. Li, Y. *et al.* DNAH6 and Its Interactions with PCD Genes in Heterotaxy and Primary Ciliary Dyskinesia. *PLoS*  
1182 *Genet.* **12**, e1005821 (2016).
- 1183 57. Coutton, C. *et al.* Mutations in CFAP43 and CFAP44 cause male infertility and flagellum defects in Trypanosoma  
1184 and human. *Nat. Commun.* **9**, 686 (2018).
- 1185 58. Matisse, M. P., Epstein, D. J., Park, H. L., Platt, K. A. & Joyner, A. L. Gli2 is required for induction of floor plate  
1186 and adjacent cells, but not most ventral neurons in the mouse central nervous system. *Development* **125**, 2759–  
1187 2770 (1998).
- 1188 59. Ichijo, R., Iizuka, Y., Kubo, H. & Toyoshima, F. Essential roles of Tbx3 in embryonic skin development during  
1189 epidermal stratification. *Genes Cells* **22**, 284–292 (2017).
- 1190 60. Khan, S. F. *et al.* The roles and regulation of TBX3 in development and disease. *Gene* **726**, 144223 (2020).
- 1191 61. Zhang, Z. *et al.* Transcription factor Etv5 is essential for the maintenance of alveolar type II cells. *Proc. Natl.*  
1192 *Acad. Sci. U. S. A.* **114**, 3903–3908 (2017).

- 1193 62. Herriges, M. & Morrisey, E. E. Lung development: orchestrating the generation and regeneration of a complex  
1194 organ. *Development* **141**, 502–513 (2014).
- 1195 63. Paaby, A. B. & Rockman, M. V. The many faces of pleiotropy. *Trends Genet.* **29**, 66–73 (2013).
- 1196 64. Zeidler, M. *et al.* NOCICEPTRA: Gene and microRNA Signatures and Their Trajectories Characterizing Human  
1197 iPSC-Derived Nociceptor Maturation. *Adv. Sci.* **8**, e2102354 (2021).
- 1198 65. Timmer, J. R., Mak, T. W., Manova, K., Anderson, K. V. & Niswander, L. Tissue morphogenesis and vascular  
1199 stability require the Frem2 protein, product of the mouse myelencephalic blebs gene. *Proc. Natl. Acad. Sci. U. S.*  
1200 *A.* **102**, 11746–11750 (2005).
- 1201 66. Larrucea, S. *et al.* Expression of podocalyxin enhances the adherence, migration, and intercellular  
1202 communication of cells. *Exp. Cell Res.* **314**, 2004–2015 (2008).
- 1203 67. Ponnusamy, M. P. *et al.* Emerging role of mucins in epithelial to mesenchymal transition. *Curr. Cancer Drug*  
1204 *Targets* **13**, 945–956 (2013).
- 1205 68. Weins, A. *et al.* Differentiation- and stress-dependent nuclear cytoplasmic redistribution of myopodin, a novel  
1206 actin-bundling protein. *J. Cell Biol.* **155**, 393–404 (2001).
- 1207 69. Kwartler, C. S. *et al.* Overexpression of smooth muscle myosin heavy chain leads to activation of the unfolded  
1208 protein response and autophagic turnover of thick filament-associated proteins in vascular smooth muscle cells.  
1209 *J. Biol. Chem.* **289**, 14075–14088 (2014).
- 1210 70. Wang, Z., Wang, D.-Z., Pipes, G. C. T. & Olson, E. N. Myocardin is a master regulator of smooth muscle gene  
1211 expression. *Proc. Natl. Acad. Sci. U. S. A.* **100**, 7129–7134 (2003).
- 1212 71. Gharibi, A. *et al.* ITGA1 is a pre-malignant biomarker that promotes therapy resistance and metastatic potential  
1213 in pancreatic cancer. *Sci. Rep.* **7**, 10060 (2017).
- 1214 72. Fanjul-Fernández, M. *et al.* Cell–cell adhesion genes CTNNA2 and CTNNA3 are tumour suppressors frequently  
1215 mutated in laryngeal carcinomas. *Nature Communications* vol. 4 (2013).
- 1216 73. Mead, T. J. *et al.* A far-upstream (-70 kb) enhancer mediates Sox9 auto-regulation in somatic tissues during  
1217 development and adult regeneration. *Nucleic Acids Res.* **41**, 4459–4469 (2013).
- 1218 74. Long, H. K. *et al.* Loss of Extreme Long-Range Enhancers in Human Neural Crest Drives a Craniofacial  
1219 Disorder. *Cell Stem Cell* **27**, 765–783.e14 (2020).
- 1220 75. Yao, B. *et al.* The SOX9 upstream region prone to chromosomal aberrations causing campomelic dysplasia  
1221 contains multiple cartilage enhancers. *Nucleic Acids Res.* **43**, 5394–5408 (2015).
- 1222 76. Nagakura, R. *et al.* Switching of Sox9 expression during musculoskeletal system development. *Sci. Rep.* **10**,  
1223 8425 (2020).



- 1224 77. Scott, C. E. *et al.* SOX9 induces and maintains neural stem cells. *Nat. Neurosci.* **13**, 1181–1189 (2010).
- 1225 78. Kawaguchi, Y. Sox9 and programming of liver and pancreatic progenitors. *J. Clin. Invest.* **123**, 1881–1886  
1226 (2013).
- 1227 79. Kumar, S. *et al.* Sox9 Activation Highlights a Cellular Pathway of Renal Repair in the Acutely Injured Mammalian  
1228 Kidney. *Cell Rep.* **12**, 1325–1338 (2015).
- 1229 80. Tanimizu, N. *et al.* Progressive induction of hepatocyte progenitor cells in chronically injured liver. *Sci. Rep.* **7**,  
1230 39990 (2017).
- 1231 81. Rockich, B. E. *et al.* Sox9 plays multiple roles in the lung epithelium during branching morphogenesis. *Proc. Natl.*  
1232 *Acad. Sci. U. S. A.* **110**, E4456–64 (2013).
- 1233 82. Wagner, T. *et al.* Autosomal sex reversal and campomelic dysplasia are caused by mutations in and around the  
1234 SRY-related gene SOX9. *Cell* **79**, 1111–1120 (1994).
- 1235 83. Bi, W. *et al.* Haploinsufficiency of Sox9 results in defective cartilage primordia and premature skeletal  
1236 mineralization. *Proc. Natl. Acad. Sci. U. S. A.* **98**, 6698–6703 (2001).
- 1237 84. Borcharding, N. *et al.* Mapping the immune environment in clear cell renal carcinoma by single-cell genomics.  
1238 *Commun Biol* **4**, 122 (2021).
- 1239 85. Hernández, R. *et al.* Differentiation of Human Mesenchymal Stem Cells towards Neuronal Lineage: Clinical Trials  
1240 in Nervous System Disorders. *Biomol. Ther.* **28**, 34–44 (2020).
- 1241 86. Kuss, P. *et al.* Regulation of cell polarity in the cartilage growth plate and perichondrium of metacarpal elements  
1242 by HOXD13 and WNT5A. *Dev. Biol.* **385**, 83–93 (2014).
- 1243 87. Akiyama, H., Chaboissier, M.-C., Martin, J. F., Schedl, A. & de Crombrughe, B. The transcription factor Sox9  
1244 has essential roles in successive steps of the chondrocyte differentiation pathway and is required for expression  
1245 of Sox5 and Sox6. *Genes Dev.* **16**, 2813–2828 (2002).
- 1246 88. Zhang, C.-H. *et al.* Creb5 establishes the competence for Prg4 expression in articular cartilage. *Commun Biol* **4**,  
1247 332 (2021).
- 1248 89. Wu, Z. *et al.* Depletion of MEIS2 inhibits osteogenic differentiation potential of human dental stem cells. *Int. J.*  
1249 *Clin. Exp. Med.* **8**, 7220–7230 (2015).
- 1250 90. Miller, J. D., Lankford, S. M., Adler, K. B. & Brody, A. R. Mesenchymal stem cells require MARCKS protein for  
1251 directed chemotaxis in vitro. *Am. J. Respir. Cell Mol. Biol.* **43**, 253–258 (2010).
- 1252 91. Montzka, K. *et al.* Neural differentiation potential of human bone marrow-derived mesenchymal stromal cells:  
1253 misleading marker gene expression. *BMC Neurosci.* **10**, 16 (2009).
- 1254 92. Dickinson, M. E. *et al.* High-throughput discovery of novel developmental phenotypes. *Nature* **537**, 508–514

- 1255 (2016).
- 1256 93. Brown, S. D. M. Advances in mouse genetics for the study of human disease. *Human Molecular Genetics* vol. 30  
1257 R274–R284 (2021).
- 1258 94. Kraft, K. *et al.* Deletions, Inversions, Duplications: Engineering of Structural Variants using CRISPR/Cas in Mice.  
1259 *Cell Rep.* **10**, 833–839 (2015).
- 1260 95. Cao, J. sci-RNA-seq3 v1. *protocols.io* (2019) doi:10.17504/protocols.io.9yih7ue.
- 1261 96. Renaud, G., Stenzel, U., Maricic, T., Wiebe, V. & Kelso, J. deML: robust demultiplexing of Illumina sequences  
1262 using a likelihood-based approach. *Bioinformatics* **31**, 770–772 (2015).
- 1263 97. Cao, J. *et al.* Comprehensive single-cell transcriptional profiling of a multicellular organism. *Science* **357**, 661–  
1264 667 (2017).
- 1265 98. Dobin, A. *et al.* STAR: ultrafast universal RNA-seq aligner. *Bioinformatics* **29**, 15–21 (2013).
- 1266 99. Anders, S., Pyl, P. T. & Huber, W. HTSeq—a Python framework to work with high-throughput sequencing data.  
1267 *Bioinformatics* **31**, 166–169 (2015).
- 1268 100. Wolock, S. L., Lopez, R. & Klein, A. M. Scrublet: Computational Identification of Cell Doublets in Single-Cell  
1269 Transcriptomic Data. *Cell Syst* **8**, 281–291.e9 (2019).
- 1270 101. Stuart, T. *et al.* Comprehensive Integration of Single-Cell Data. *Cell* **177**, 1888–1902.e21 (2019).
- 1271 102. Wang, F. *et al.* RNAscope: a novel in situ RNA analysis platform for formalin-fixed, paraffin-embedded tissues. *J.*  
1272 *Mol. Diagn.* **14**, 22–29 (2012).
- 1273 103. Schindelin, J. *et al.* Fiji: an open-source platform for biological-image analysis. *Nat. Methods* **9**, 676–682 (2012).
- 1274 104. Subramanian, A. *et al.* Gene set enrichment analysis: a knowledge-based approach for interpreting genome-  
1275 wide expression profiles. *Proc. Natl. Acad. Sci. U. S. A.* **102**, 15545–15550 (2005).
- 1276 105. Liberzon, A. *et al.* The Molecular Signatures Database (MSigDB) hallmark gene set collection. *Cell Syst* **1**, 417–  
1277 425 (2015).

1278

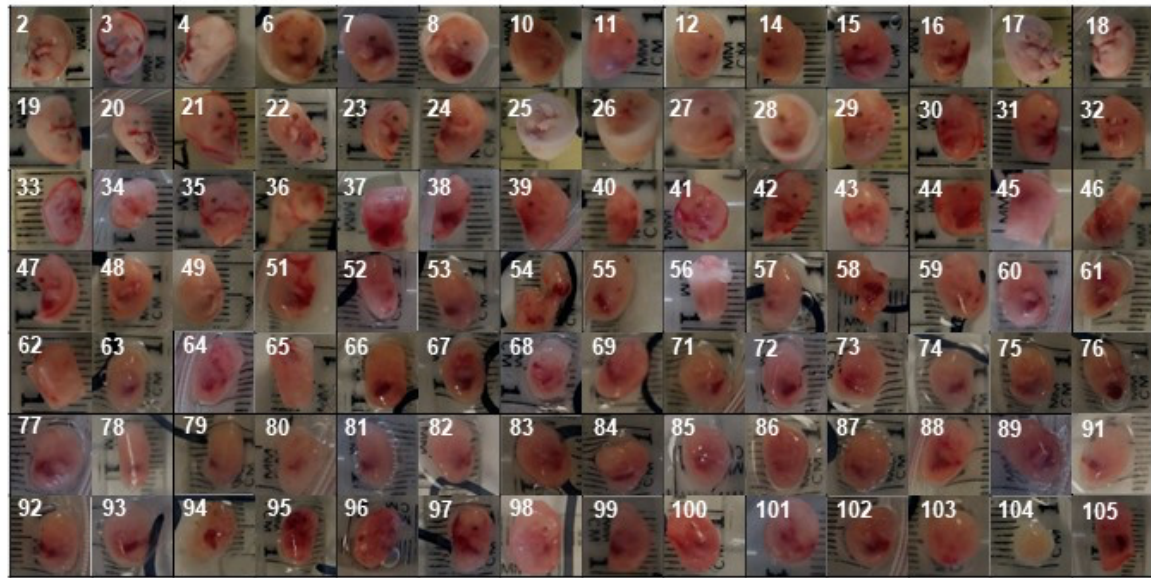

|       |                      |       |                         |         |                       |
|-------|----------------------|-------|-------------------------|---------|-----------------------|
| 1-4   | G4 WT strain         | 37-40 | Scn10a/11a DKO          | 74-77   | Dmrt1 TAD boundary KO |
| 5-8   | Ror2 KI              | 41-44 | C57BL/6 WT strain       | 78-81   | Tbx3 TAD boundary KO  |
| 9-12  | Cdk15 -Y             | 45-48 | Gorab KO                | 82-85   | ZRS limb enhancer KO  |
| 13-16 | Fat1 TAD KO          | 50-53 | Smad3 TAD boundary KO   | 86-89   | FVB WT strain         |
| 17-20 | Atp6v0a2 KO          | 54-57 | Twist1 TAD boundary KO  | 90-93   | BALB/C WT strain      |
| 21-24 | Atp6v0a2 R755Q       | 58-61 | Tbx5 TAD boundary KO    | 94-97   | Gli2 KO               |
| 25-28 | Sox9 TAD boundary KI | 62-65 | Neurog2 TAD boundary KO | 98-101  | Carm1 KO              |
| 29-32 | Sox9 regulatory INV  | 66-69 | Sim1 TAD boundary KO    | 102-105 | Ttc21b KO             |
| 33-36 | Scn11a GOF           | 70-73 | Smad7 TAD boundary KO   |         |                       |

1279  
1280

1281 **Supplementary Figure 1. Images of mouse embryos.** 104 embryos (26 genotypes x 4 replicates) were  
 1282 staged at E13.5 and sent by five groups to a single site. #49 was accidentally skipped in our numbering  
 1283 systems. Embryo #70 was lost in transport. Pictures of embryos #1, #5, #9, #13 and #91 were not taken,  
 1284 but the embryos were included in the sci-RNA-seq3 experiment. As discussed in the text, embryos #41 and  
 1285 #104 were labelled as outliers based on computational analyses and their data discarded, while data from  
 1286 the remaining 101 embryos were retained and analysed further. Of note, in addition to the computational  
 1287 analyses suggesting that embryo #104 was an outlier, it was also relatively small in size upon visualisation.  
 1288

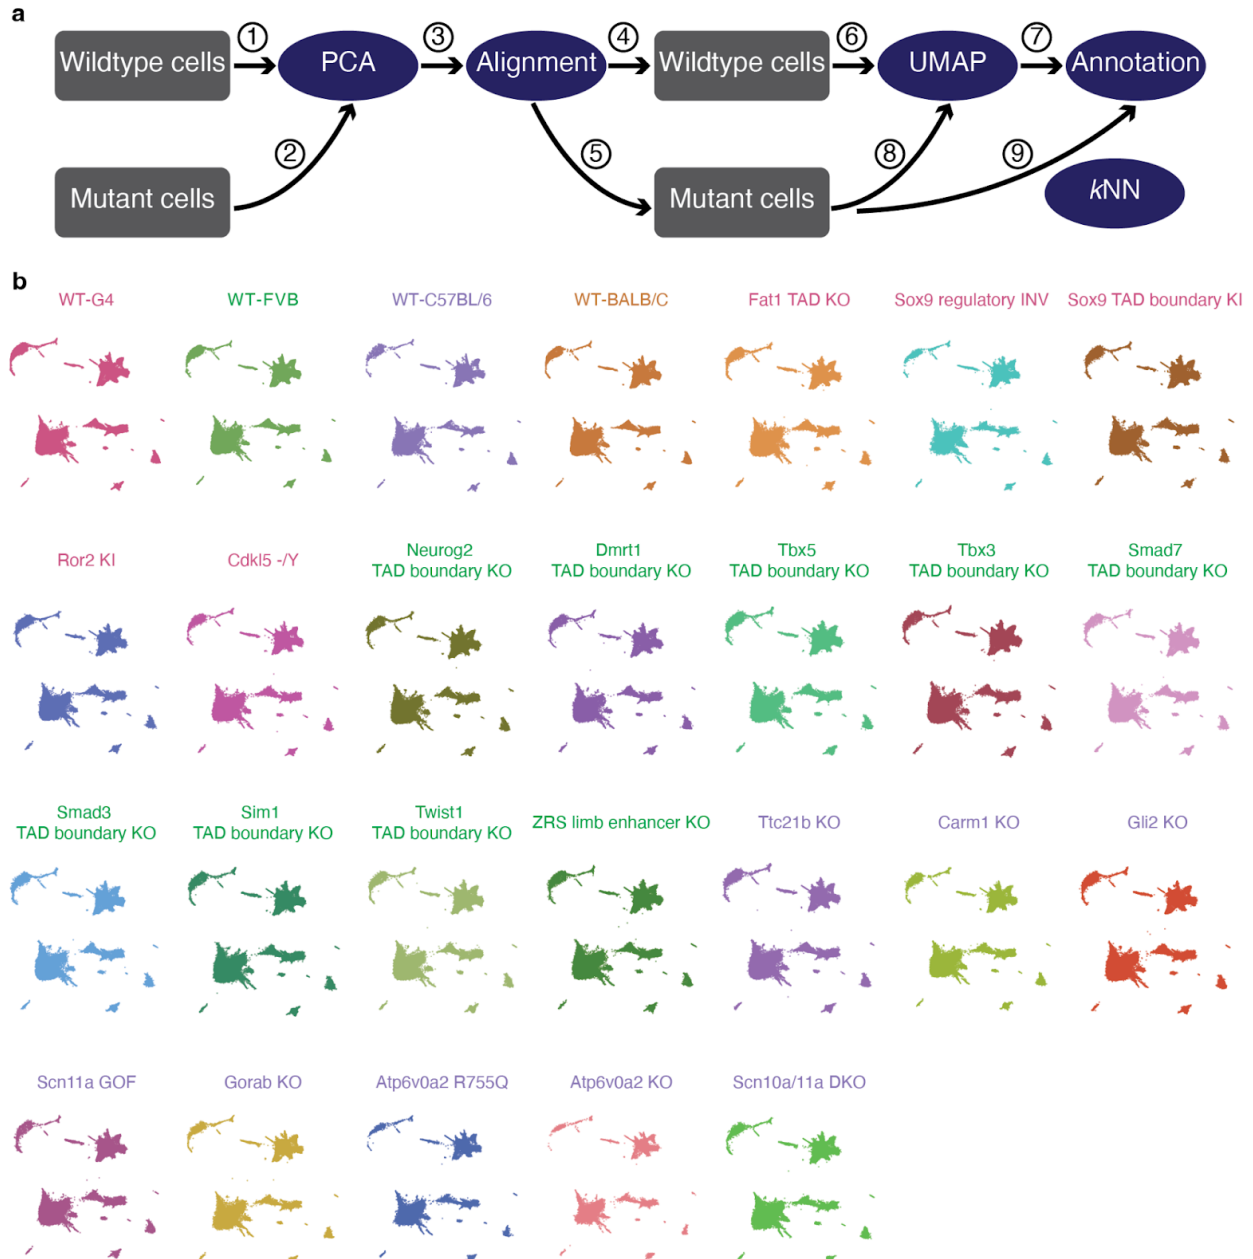

1289  
1290

1291 **Supplementary Figure 2. Integrating cells derived from embryos of multiple genetic backgrounds**  
 1292 **to a single, wildtype-based “reference embedding”.** **a**, Schematic of approach. We first applied principal  
 1293 components-based dimensionality reduction to cells from wildtype genotypes only (①). We then projected  
 1294 cells from the mutant embryos to this PCA embedding (②). Next, to mitigate potential biases from technical  
 1295 factors, we applied the *align\_cds* function in *Monocle/v3*, with the MT%, Ribo%, and log-transformed total  
 1296 UMIs of each cell as covariates (③). We then split wildtype and mutant cells again (④ & ⑤), and applied  
 1297 the UMAP algorithm to wildtype cells only using their “aligned” PC features (⑥), followed by Louvain  
 1298 clustering and manual annotation of individual clusters based on marker gene expression to identify major  
 1299 trajectories, and then iterative clustering and annotation to identity and annotate sub-trajectories (⑦).  
 1300 Finally, cells from mutant embryos were projected to this wildtype-based UMAP embedding, again using  
 1301 their aligned PC features (⑧). Major trajectory labels were assigned to mutant cells via a *k*-nearest

1302 neighbour ( $k$ -NN) heuristic, and these last steps were repeated to further assign sub-trajectory labels to  
1303 mutant cells (9). **b**, 3D UMAP visualisations of cells from each wildtype or mutant background within the  
1304 shared “reference embedding” resulting from the aforescribed procedures.  
1305



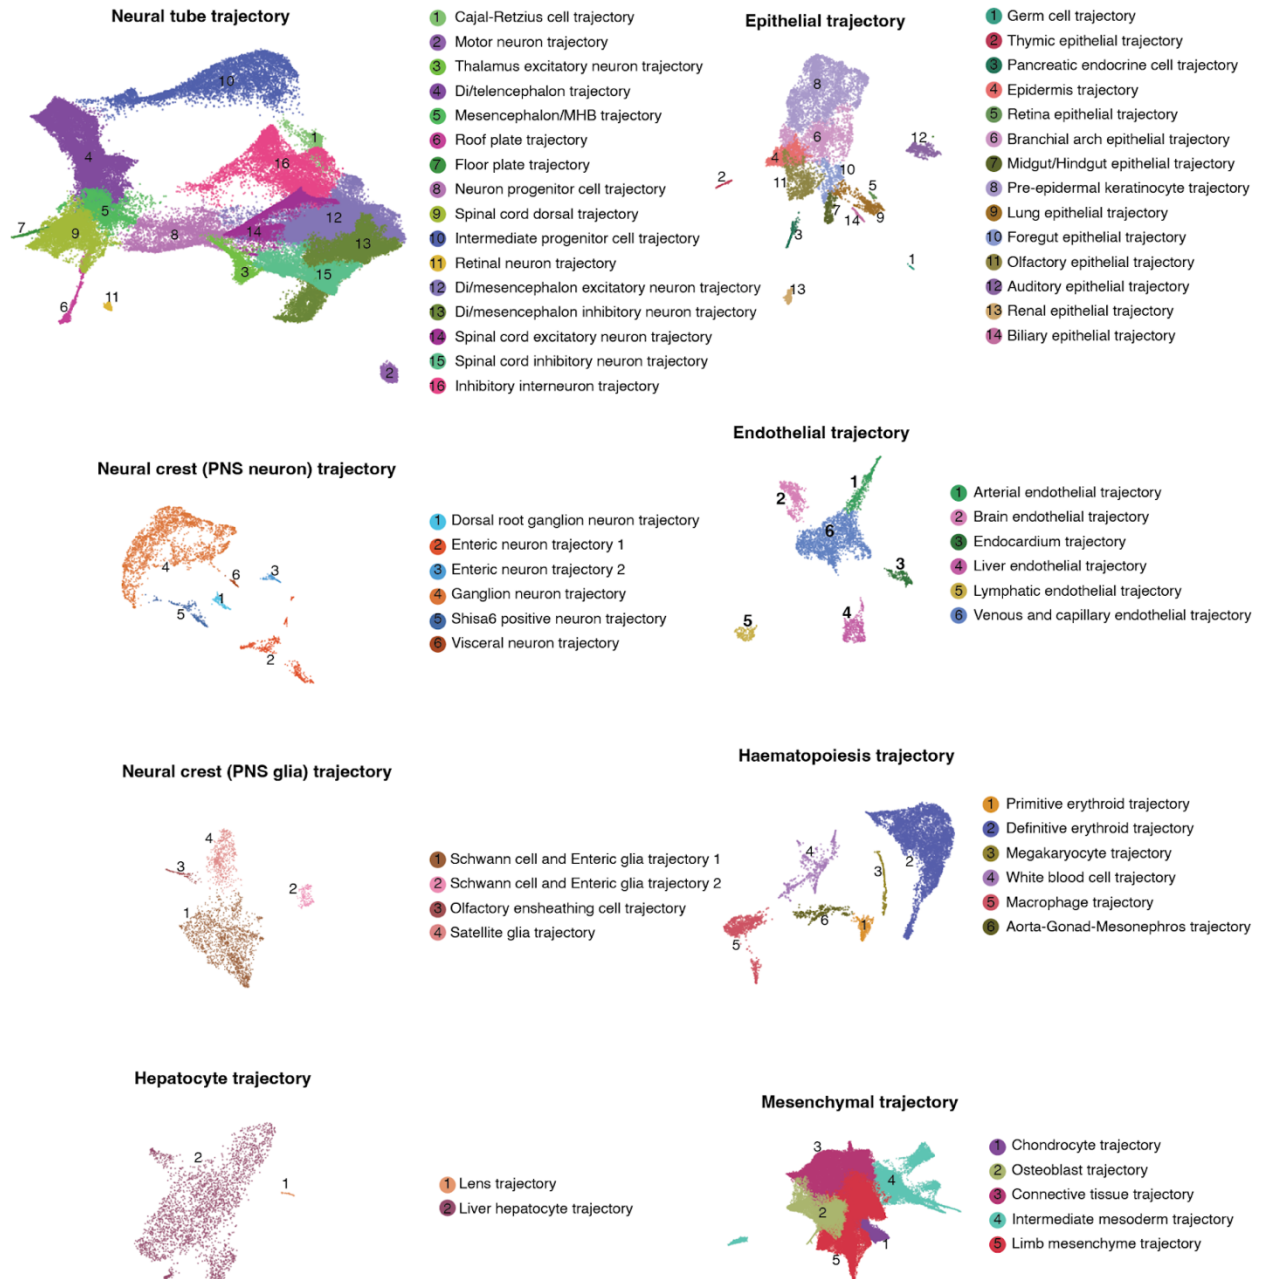

1306  
1307

1308 **Supplementary Figure 3. Annotation of sub-trajectories in data from wildtype E13.5 embryos.** From  
1309 215,517 single cell profiles of wildtype E13.5 embryos of four strains in MMCA, we annotated 13 major  
1310 trajectories. For 8 of these 13 major trajectories, iterative analysis identified the additional sub-trajectories  
1311 shown here as 3D UMAP visualisations. Cells are colored by sub-trajectory annotations. PNS: peripheral  
1312 nervous system. MHB: midbrain-hindbrain boundary. Di: Diencephalon.  
1313

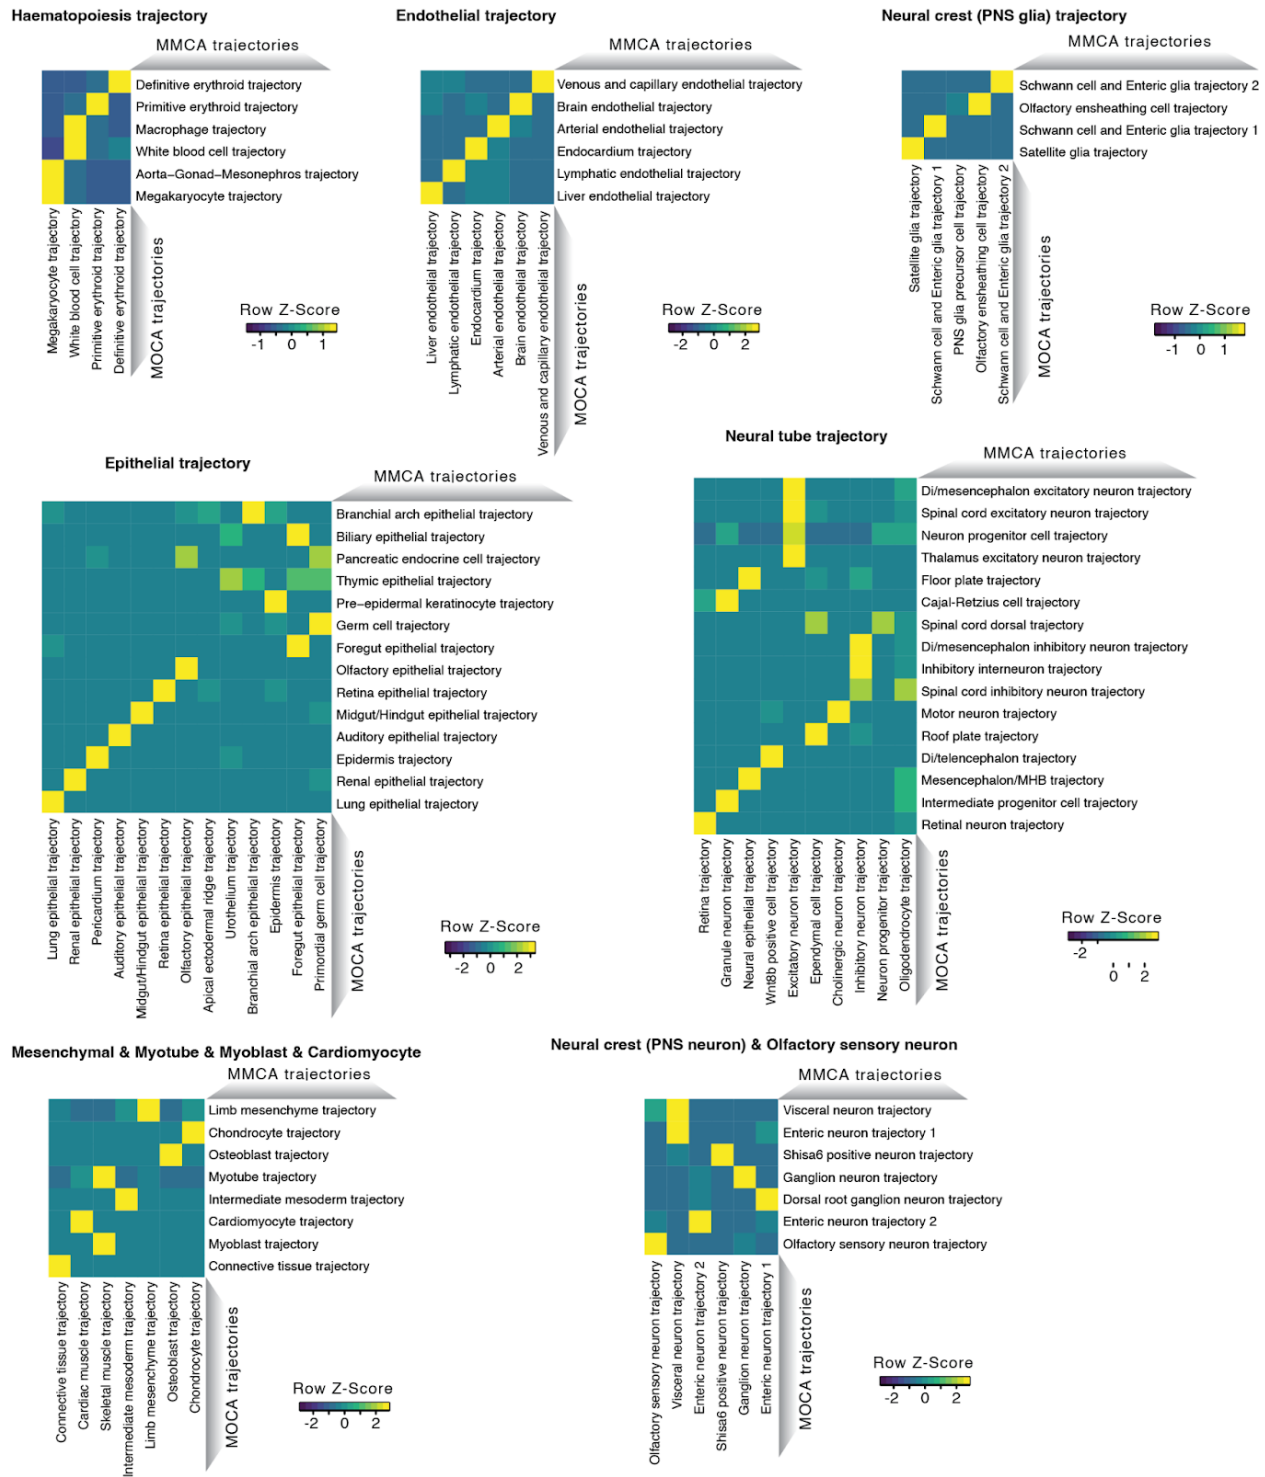

1314  
1315  
1316  
1317  
1318  
1319  
1320  
1321

**Supplementary Figure 4. Correlated developmental sub-trajectories between MOCA (E9.5 - E13.5) and MMCA (E13.5 only) based on non-negative least-squares (NMLS) regression.** Similar to Fig. 1f, shown here are heat maps of the combined  $\beta$  values (row-scaled) between developmental sub-trajectories from MMCA (rows) and developmental sub-trajectories from the MOCA (columns), within each major trajectory. PNS: peripheral nervous system. MHB: midbrain-hindbrain boundary. Di: Diencephalon.

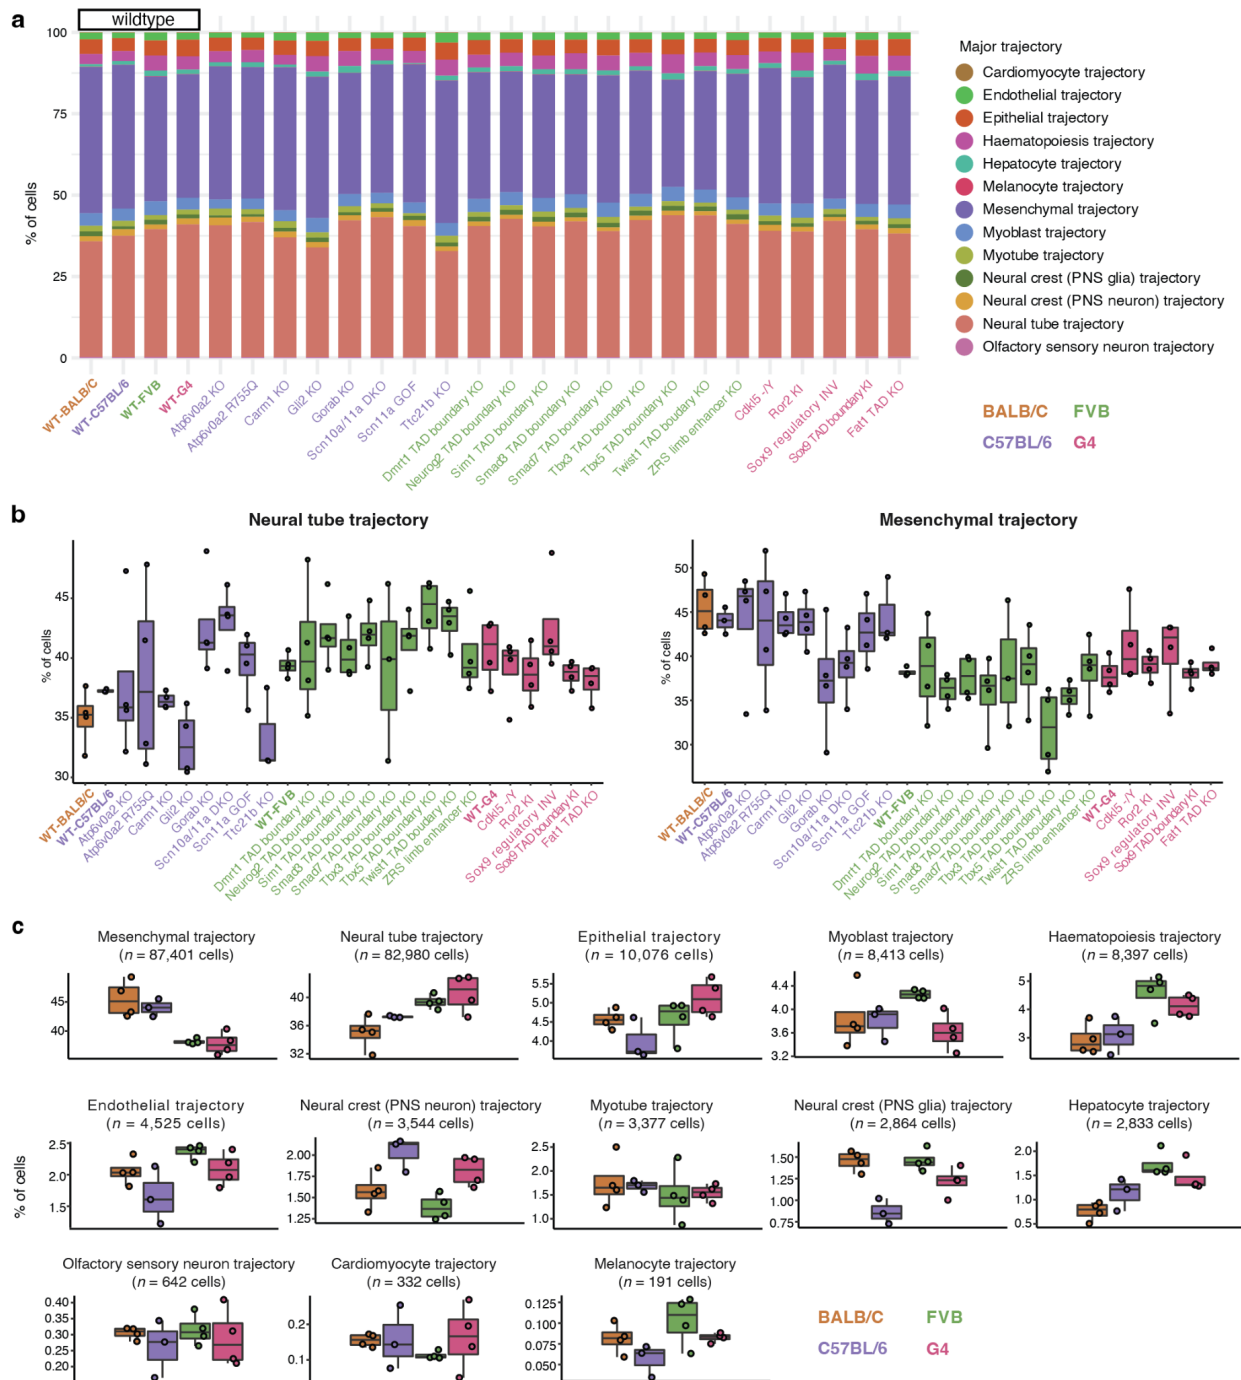

1322  
1323

1324 **Supplementary Figure 5. Cell composition for individual wildtype and mutant embryos across**  
 1325 **developmental trajectories.** **a**, Cell composition across 13 major trajectories of embryos from different  
 1326 wildtype or mutant strains. Cells from all replicates for each strain were pooled for this visualisation. **b**,  
 1327 Boxplots of cell proportions falling into neural tube (left) or mesenchymal (right) trajectories for different  
 1328 wildtype or mutant strains. Each point corresponds to an individual embryo. **c**, Boxplots of cell proportions  
 1329 falling into each of the 13 major trajectories for the four wildtype strains. Each point corresponds to an  
 1330 individual embryo. The total number of cells from each major trajectory profiled from wildtype embryos is

1331 also listed. In the boxplots (panels b & c), the centre lines show the medians; the box limits indicate the  
1332 25th and 75th percentiles; the replicates are represented by the dots. PNS: peripheral nervous system.  
1333

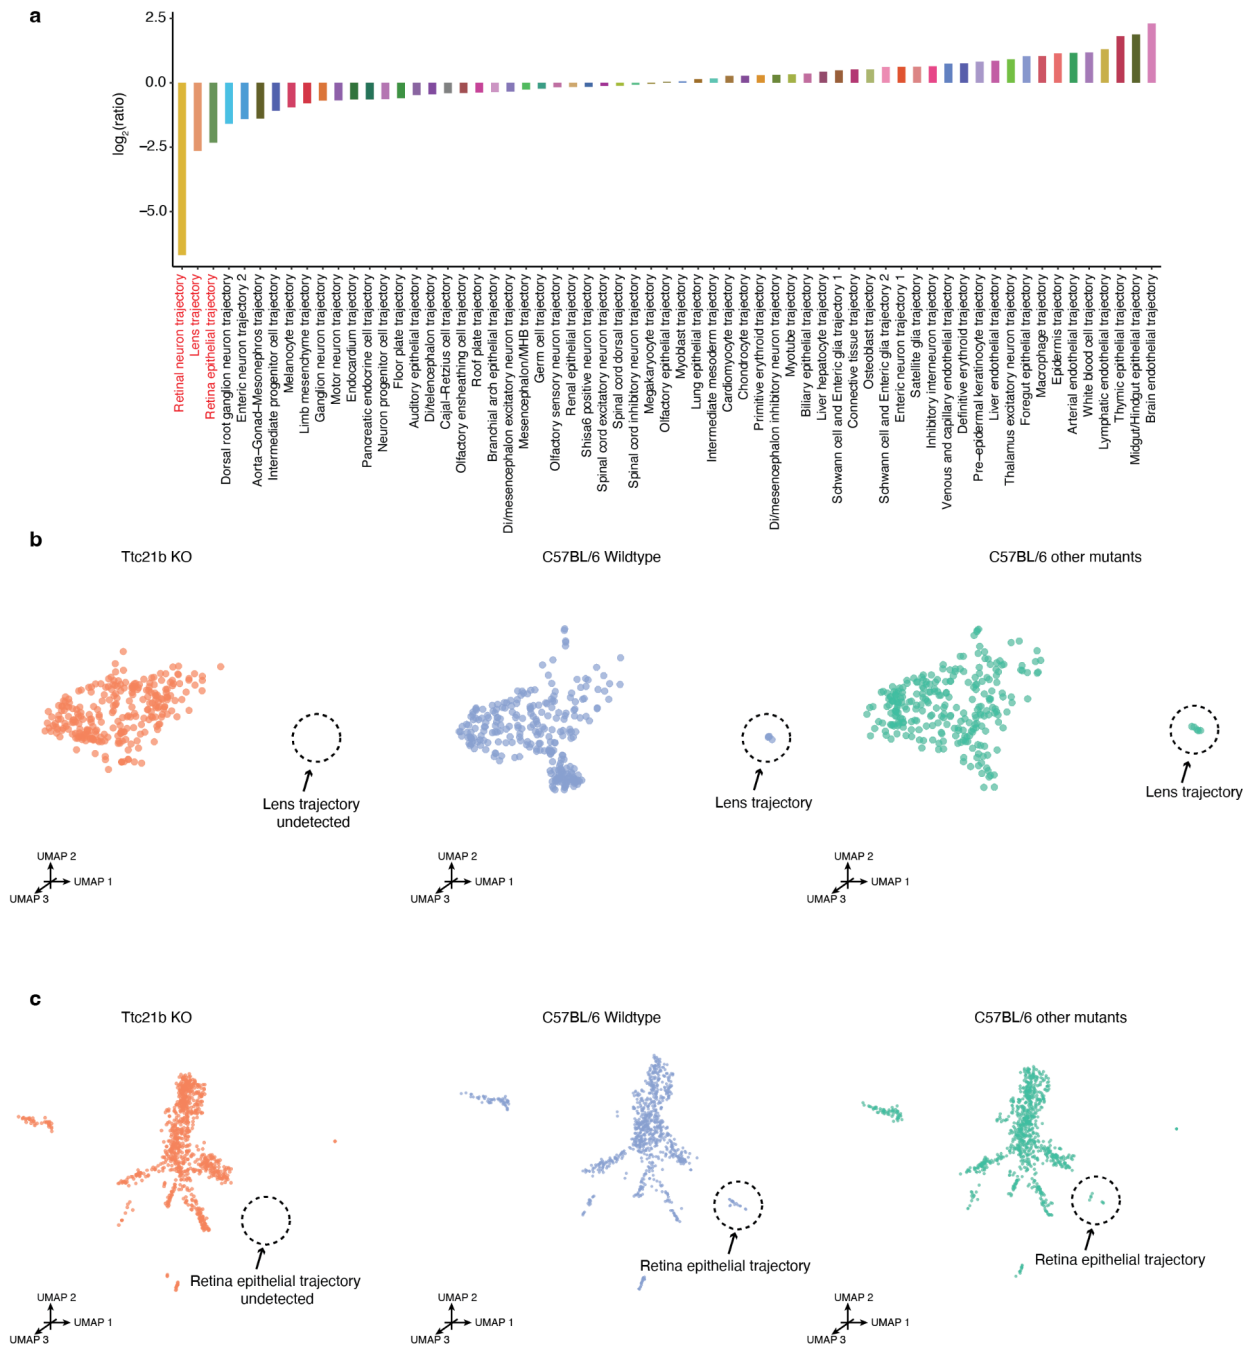

1334  
1335

1336 **Supplementary Figure 6. Multiple retinal trajectories are diminished in *Ttc21b* KO mice.** **a**, The log<sub>2</sub>  
1337 transformed ratio of the cell proportions of each sub-trajectory, comparing *Ttc21b* KO and C57BL/6 wildtype  
1338 embryos, are shown. Although reductions in the retina epithelial and lens trajectories were excluded from  
1339 the regression analysis due to their low numbers, they were, together with the retinal neuron trajectory, the  
1340 most extreme in magnitude. **b**, 3D UMAP visualisation of the hepatocyte major trajectory, highlighting cells  
1341 from either the *Ttc21b* KO (left), C57BL/6 wildtype (middle), or other mutants on the C57BL/6 background  
1342 (right). The three plots were randomly downsampled to the same number of cells ( $n = 264$  cells) **c**, 3D  
1343 UMAP visualisation of the epithelial major trajectory, highlighting cells from either the *Ttc21b* KO (left),



1344 C57BL/6 wildtype (middle), or other mutants on the C57BL/6 background (right). The three plots were  
1345 randomly downsampled to the same number of cells ( $n = 937$  cells).  
1346

**a**

ZRS limb enhancer KO

UMAP 2  
↑  
→ UMAP 1

FVB wildtype

UMAP 2  
↑  
→ UMAP 1

**b**

Myoblast trajectory

Osteoblast trajectory

UMAP 2  
↑  
→ UMAP 1

UMAP 2  
↑  
→ UMAP 1

Chondrocyte trajectory

Roof plate trajectory

UMAP 2  
↑  
→ UMAP 1

UMAP 2  
↑  
→ UMAP 1

Megakaryocyte trajectory

Cardiomyocyte trajectory

UMAP 2  
↑  
→ UMAP 1

UMAP 2  
↑  
→ UMAP 1

Schwann cell and Enteric glia trajectory 2 trajectory

● FVB wildtype

● ZRS limb enhancer KO

UMAP 2  
↑  
→ UMAP 1

1347  
1348

1349 **Supplementary Figure 7. Co-embedding cells from nominally altered trajectories from ZRS limb**  
1350 **enhancer KO and FVB wildtype. a**, UMAP visualisation of co-embedded cells of limb mesenchyme  
1351 trajectory from the ZRS limb enhancer KO and FVB wildtype. The same UMAP is shown eight times,  
1352 highlighting cells from either ZRS limb enhancer KO (top row) or FVB wildtype (bottom row), and breaking  
1353 out the four individual replicates for each strain. **b**, UMAP visualisation of co-embedded cells of various  
1354 sub-trajectories from the ZRS limb enhancer KO and FVB wildtype. The same UMAP is shown twice for  
1355 each, highlighting cells from either FVB wildtype (left) or ZRS limb enhancer KO (right). These are the seven  
1356 sub-trajectories in which, in addition to limb mesenchyme, we detected nominally significant differences in  
1357 cell type proportions for the ZRS limb enhancer KO.  
1358

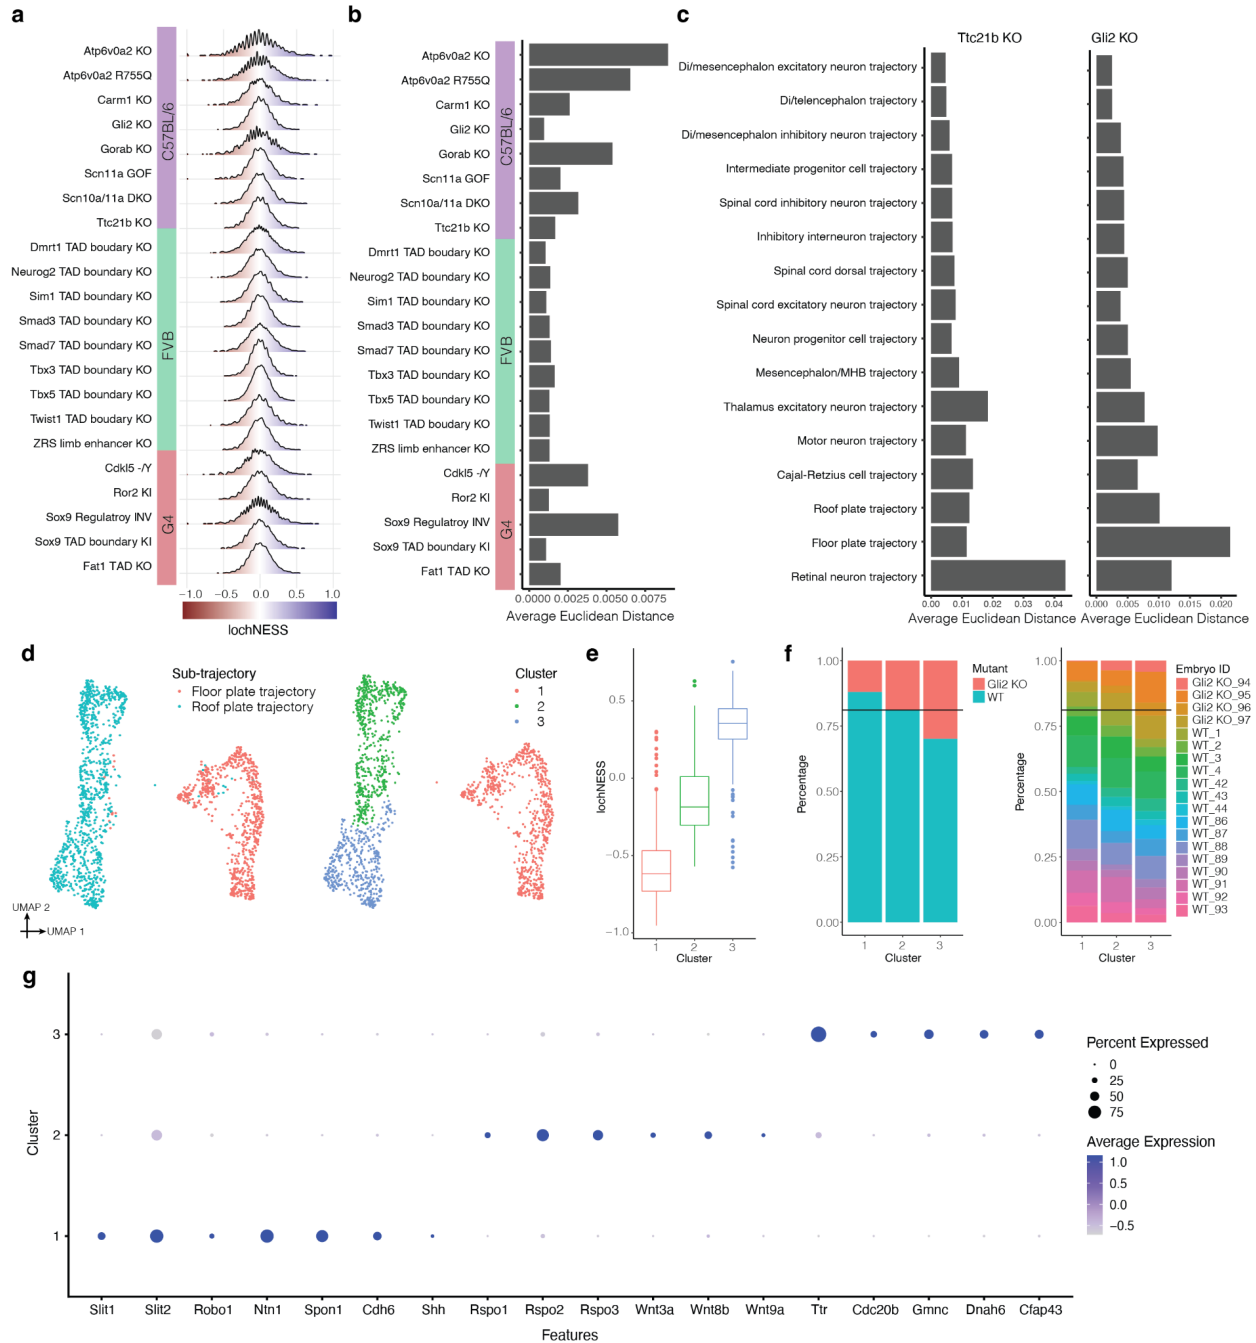

1359  
1360

1361 **Supplementary Figure 8. Quantitative analysis of lochNESS distributions and analysis of *Gli2* KO in**  
 1362 **the roof plate and floor plate trajectories. a,** Distribution of lochNESS in all cells of each mutant under  
 1363 random permutation of mutant labels. **b,** Barplot showing the average euclidean distance between  
 1364 lochNESS vs. lochNESS under permutation across all cells within a mutant. **c,** Barplots showing the  
 1365 average euclidean distance between lochNESS and lochNESS under permutation, across all cells in neural  
 1366 tube sub-trajectories of the *Ttc21b* KO and *Gli2* KO mutants. **d,** UMAP visualisation of co-embedded cells  
 1367 of the floor plate and roof plate sub-trajectories from the *Gli2* KO mutant and pooled wildtype, colored by  
 1368 sub-trajectory (left) or cluster number (right). **e,** Boxplot showing the lochNESS distribution in each cluster  
 1369 shown on the right of panel d. **f,** Barplots showing the cell composition of each cluster shown on the right

1370 of panel **d**, split by mutant vs. wildtype (left) or individual embryo (right), with a reference line at the overall  
1371 wildtype cell proportion. **g**, Dotplot summarising the expression of and percent of cells expressing selected  
1372 marker genes in each cluster shown on the right of panel **d**.  
1373

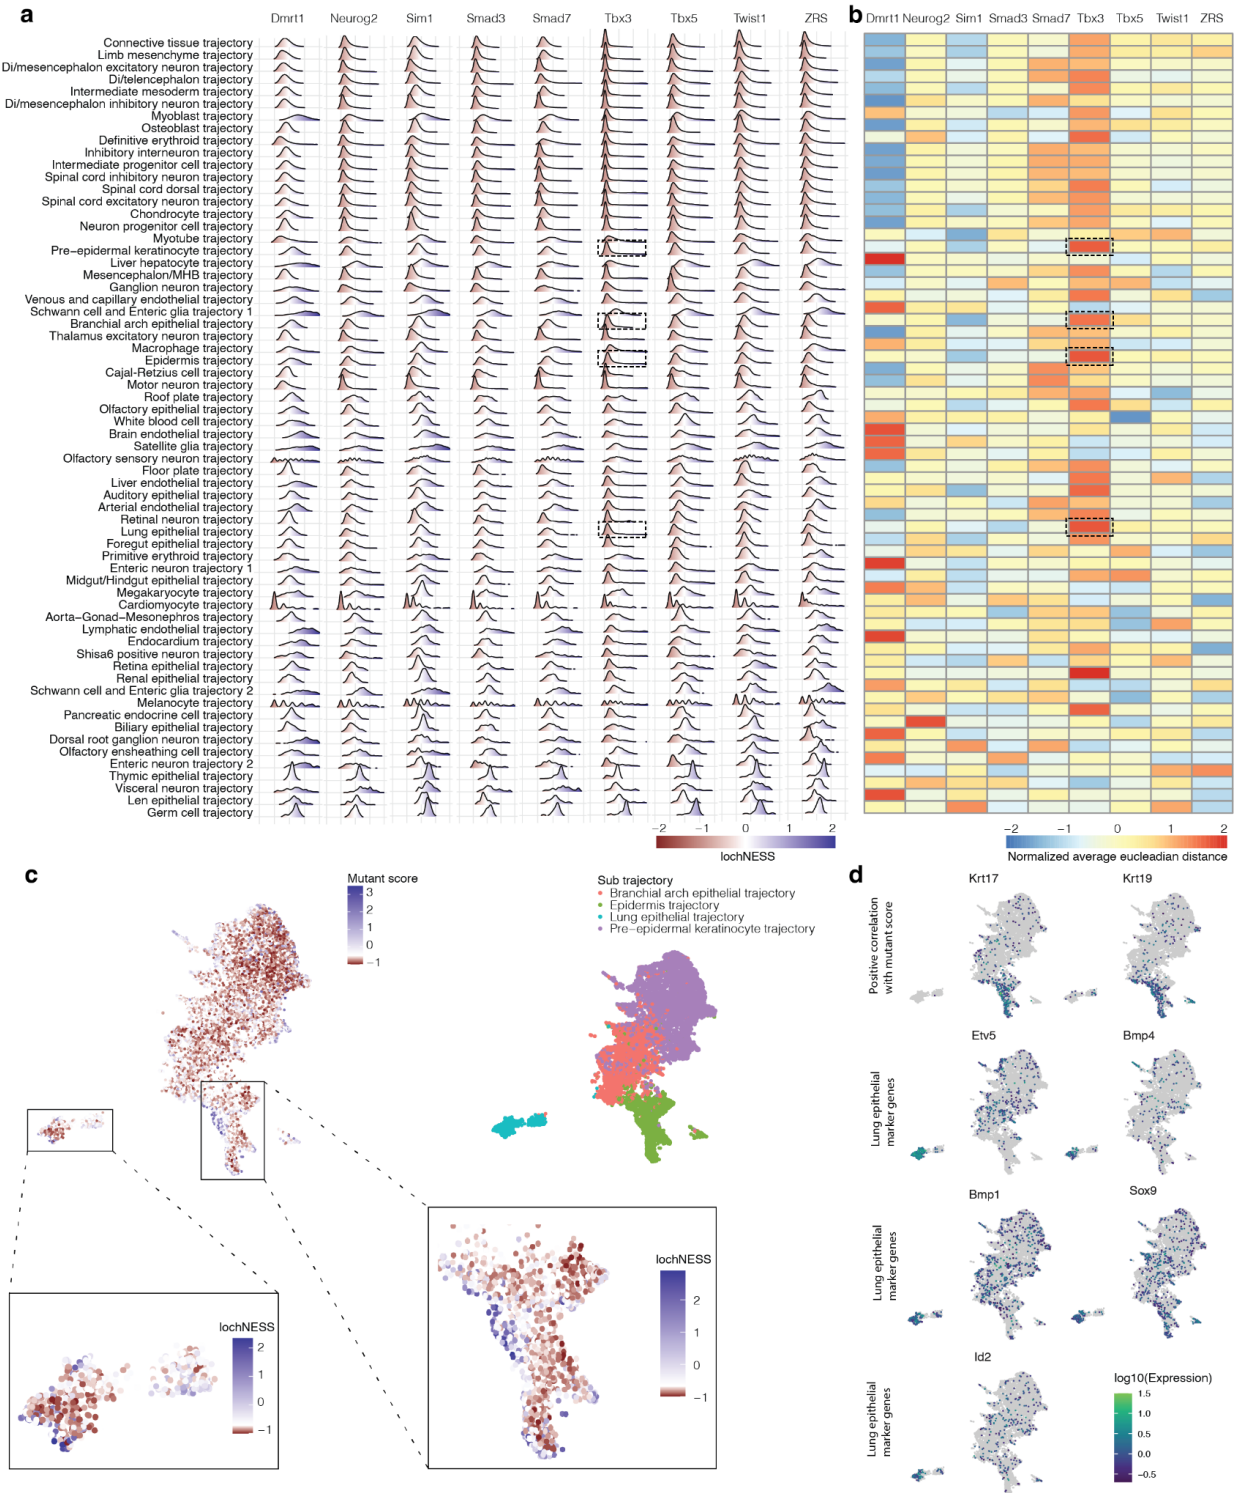

1374  
1375

1376 **Supplementary Figure 9. Systematic screening of lochNESS distributions identifies altered**  
 1377 **epithelial sub-trajectories in the *Tbx3* TAD Boundary KO mutant.** **a**, Distribution of lochNESS in each  
 1378 sub-trajectory of the mutants in the FVB background strain, all of which are TAD boundary KOs. Dashed  
 1379 boxes in the sixth column highlight the most deviated epithelial sub-trajectories in the *Tbx3* TAD Boundary  
 1380 KO mutant. **b**, Row-normalised heatmap showing the average euclidean distance between lochNESS and



1381 lochNESS under permutation in each sub-trajectory for the same mutants shown in panel **a**, centred and  
1382 scaled by row. Dashed boxes in the sixth column again highlight the most deviated epithelial sub-  
1383 trajectories in the *Tbx3* TAD Boundary KO mutant. **c**, UMAP showing co-embedding of *Tbx3* TAD Boundary  
1384 KO and pooled wildtype cells in the pre-epidermal keratinocyte, epidermis, branchial arch, and lung  
1385 epithelial sub trajectories, colored by lochNESS (top left) [with blown up insets showing lochNESS in lung  
1386 epithelial (bottom left) and epidermis (bottom right) sub-trajectories], or by sub-trajectory identity (right).  
1387 LochNESS colour scale is centred at the median of lochNESS. **d**, same as in panel **c**, but colored by  
1388 expression of selected mutant related genes and marker genes.  
1389

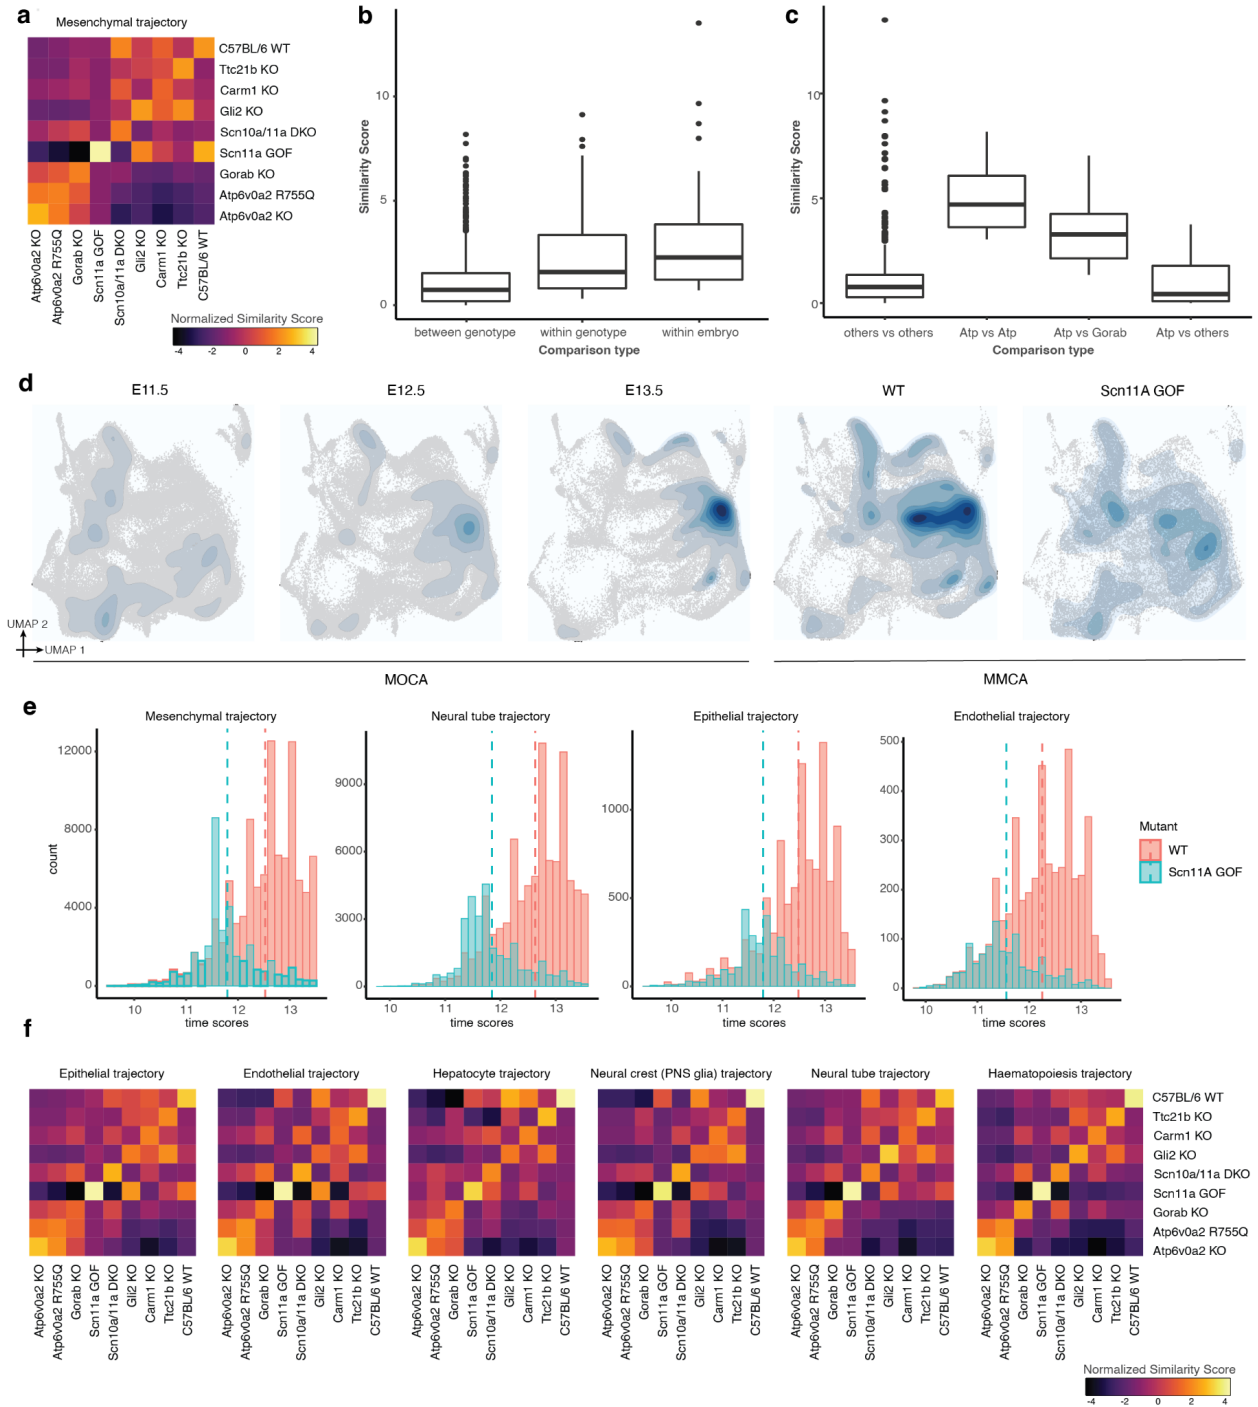

1390  
1391

1392 **Supplementary Figure 10. Similarity scores reveal mutant-shared and mutant-specific effects.**  
 1393 **a**, Heatmap showing similarity scores between C57BL/6 genotypes in the mesenchymal trajectory. **b**,  
 1394 Boxplot showing the similarity scores of comparisons between embryos of different genotypes (left),  
 1395 between embryos of the same genotype (middle), and within the same embryos (right) for C57BL/6  
 1396 genotypes in the mesenchymal trajectory. **c**, Boxplot showing the similarity scores of comparisons  
 1397 between *Atp6v0a2* KO vs. *Atp6v0a2* R755Q (left), *Atp6v0a2* KO or *Atp6v0a2* R755Q vs. *Gorab* KO  
 1398 (middle), *Atp6v0a2* KO or *Atp6v0a2* R755Q vs. other C57BL/6 genotypes, in the mesenchymal

1399 trajectory. Genotype names are simplified in the x-axis legend (“Atp” = *Atp6v0a2* KO or *Atp6v0a2*, “Gorab”  
1400 = *Gorab* KO, “others” = *Carm1* KO, *Gli2* KO, *Scn10a/11a* DKO, *Scn11a* GOF, *Ttc21b* KO or C57BL/6  
1401 wildtype). **d**, UMAPs showing co-embedding of *Scn11a* GOF cells with pooled wildtype cells and  
1402 E11.5-E13.5 MOCA cells, in the neural tube trajectory, split by mutant (MMCA) and time point (MOCA),  
1403 with cell density and distributions overlaid. **e**, Barplots showing the distribution of “time scores” for  
1404 *Scn11a* GOF cells and pooled wildtype cells in the mesenchyme, neural tube, endothelial and  
1405 epithelial main trajectories, with reference lines at the mean value of time scores. **f**, Heatmaps showing  
1406 similarity scores between C57BL/6 genotypes in selected main trajectories. *Gorab* KO exhibits high  
1407 similarity to the two *Atp6v0a2* genotypes in the epithelial, endothelial, hepatocyte and neural crest  
1408 (PNS glia) trajectories, but not the neural tube and hematopoiesis trajectories.  
1409

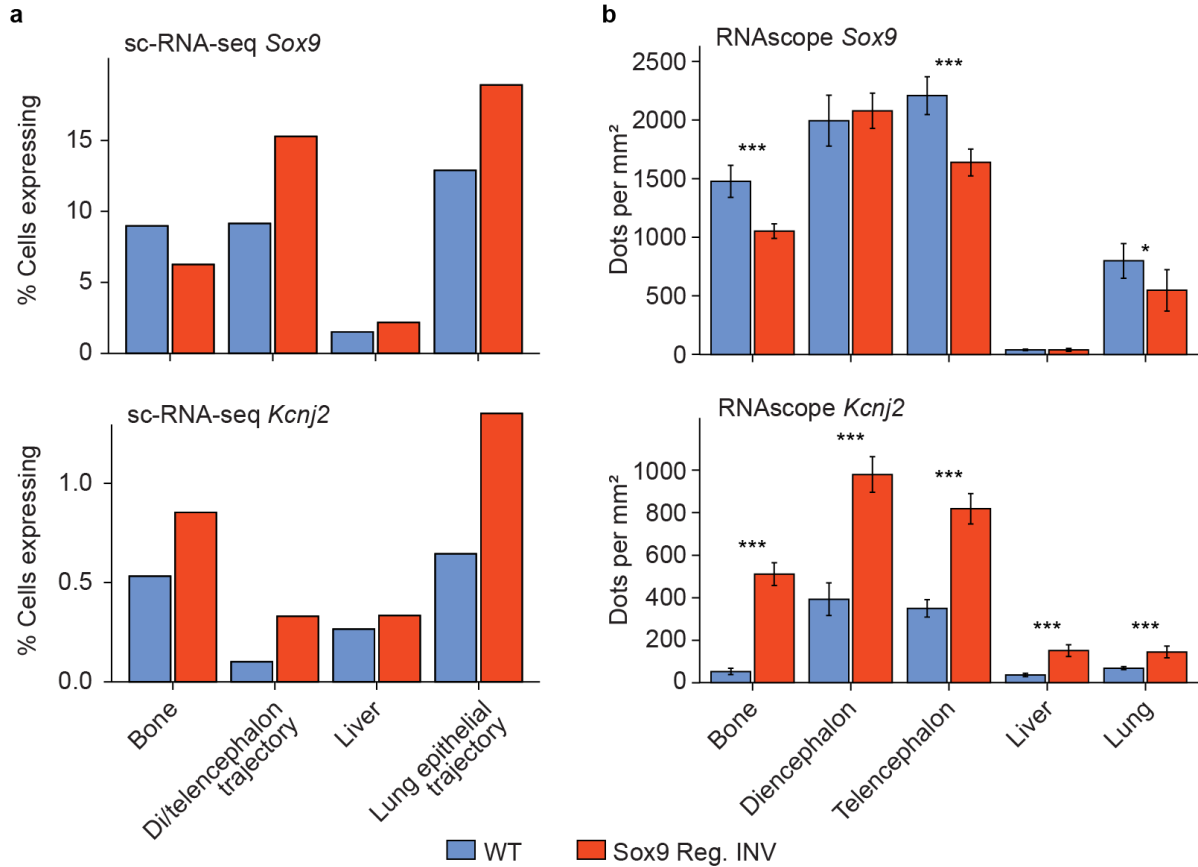

1410  
1411

1412 **Supplementary Figure 11. Misregulation of *Sox9* and *Kcnj2* in the *Sox9* regulatory INV mutant. a,**  
1413 Quantification of *Sox9* (top row) and *Kcnj2* (bottom row) expression in sc-RNA-seq data in the wildtype  
1414 (blue) and *Sox9* regulatory INV (red) genotypes in selected trajectories. For “bone” and “liver”, multiple sub-  
1415 trajectories were pooled to match the tissue labels in the RNAscope data in panel b. Specifically, “bone”  
1416 refers to cells from chondrocyte, osteoblast, and limb mesenchyme trajectories, whereas “liver” refers to  
1417 cells from the liver endothelial and liver hepatocyte trajectories. b, Quantification of *Sox9* and *Kcnj2*  
1418 expression based on RNAscope images of heterozygous E13.5 wildtype and *Sox9* regulatory INV mutant  
1419 embryos (images not shown; available upon request). The mRNA signal was counted in a defined area (1  
1420 x 1 mm<sup>2</sup>), n=6 each condition. Statistics were calculated using student t-test and evaluated the following:  
1421 p > 0.05 = non-significant; p < 0,05 - ≥ 0.01 = \*; p < 0,01 - ≥ 0.001= \*\*; p < 0.001= \*\*\*.

1422

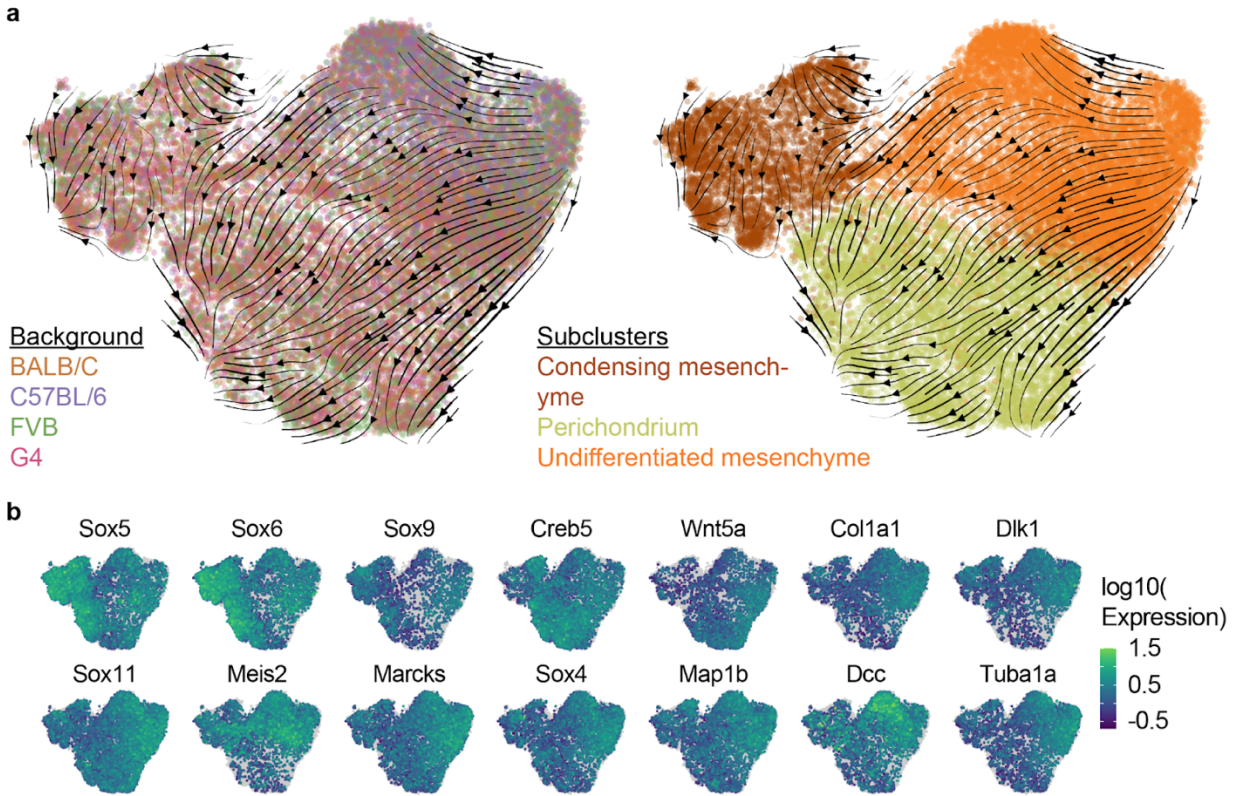

1423  
1424

1425 **Supplementary Figure 12. Sub-clustering and annotation of the wildtype limb mesenchyme.** **a**, Sub-  
1426 clustering of the limb mesenchyme trajectory based on cells from pooled wildtype. RNA velocity arrows  
1427 generated using scVelo (Methods) indicate the transition of undifferentiated mesenchyme (marked by  
1428 *Meis2*, *Marcks*, *Map1b*) into perichondrium (*Wnt5a*, *Creb5*) and condensing mesenchyme (*Sox5*, *Sox6*,  
1429 *Sox9*) in all wildtype samples<sup>86–91</sup>. **b**, Marker gene expression used to annotate limb mesenchyme sub-  
1430 clusters. All except *Dcc* and *Tuba1a* are literature-based markers of the three cell types.

1431

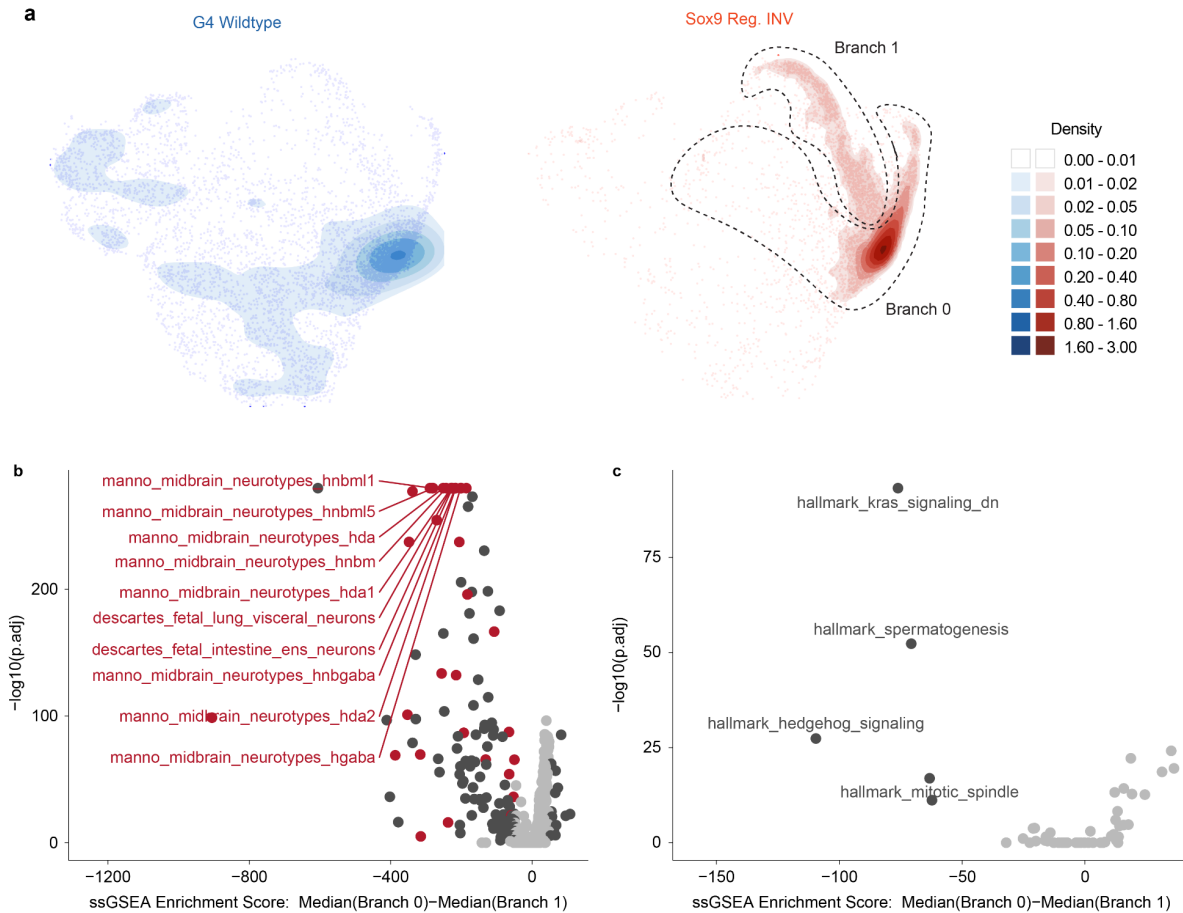

1432

1433

1434

1435 **Supplementary Figure 13. Stalling of Sox9 regulatory INV cells in the undifferentiated mesenchyme**

1436 **and gene set enrichment analysis on these cells. a**, Density plots for UMAP embedding of G4 wildtype

1437 and Sox9 regulatory INV cells in the limb mesenchymal trajectory (same embedding as **Fig. 4e**). Dotted

1438 black lines demarcate the two branches of the undifferentiated mesenchyme, based on the sub-clustering

1439 shown in **Fig. 4f**. **b,c**, Comparison of the ssGSEA<sup>84</sup> scores between the two branches of undifferentiated

1440 mesenchyme for Sox9 regulatory INV cells for (a) cell type signature (C8) and (b) Hallmark gene sets. Gene

1441 sets that are both significantly different between the two branches and that have a difference in median

1442 ssGSEA scores greater than 50 are highlighted in dark grey, and the ten most significantly different gene

1443 sets are also labelled. In panel **b**, all significantly different gene sets with names containing “neuro” are

1444 highlighted in red.

1444



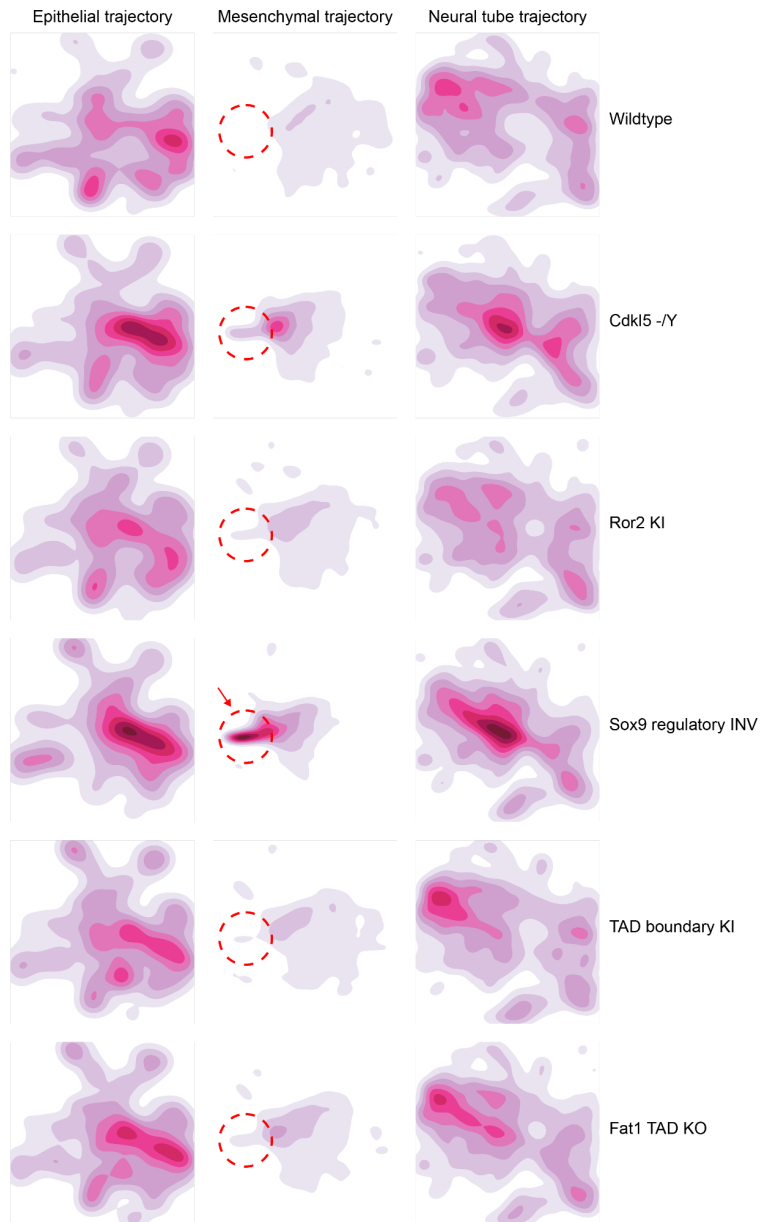

1445  
1446  
1447  
1448  
1449  
1450  
1451  
1452  
1453

**Supplementary Figure 14. Density plots of the UMAP co-embedding of wildtype and mutant samples from G4 mouse background.** We focus on the epithelial, mesenchymal and neural tube main trajectories, which are the three largest. The densities are corrected for the total number of cells. The colour scale is kept consistent across mutants (rows), but varied across the trajectories (columns). Arrow points to the accumulation of cells in the Sox9 regulatory INV mutant. Dotted circles demarcate the location of cellular accumulation in Sox9 regulatory INV mutant in the same embedding across all the other mutants.

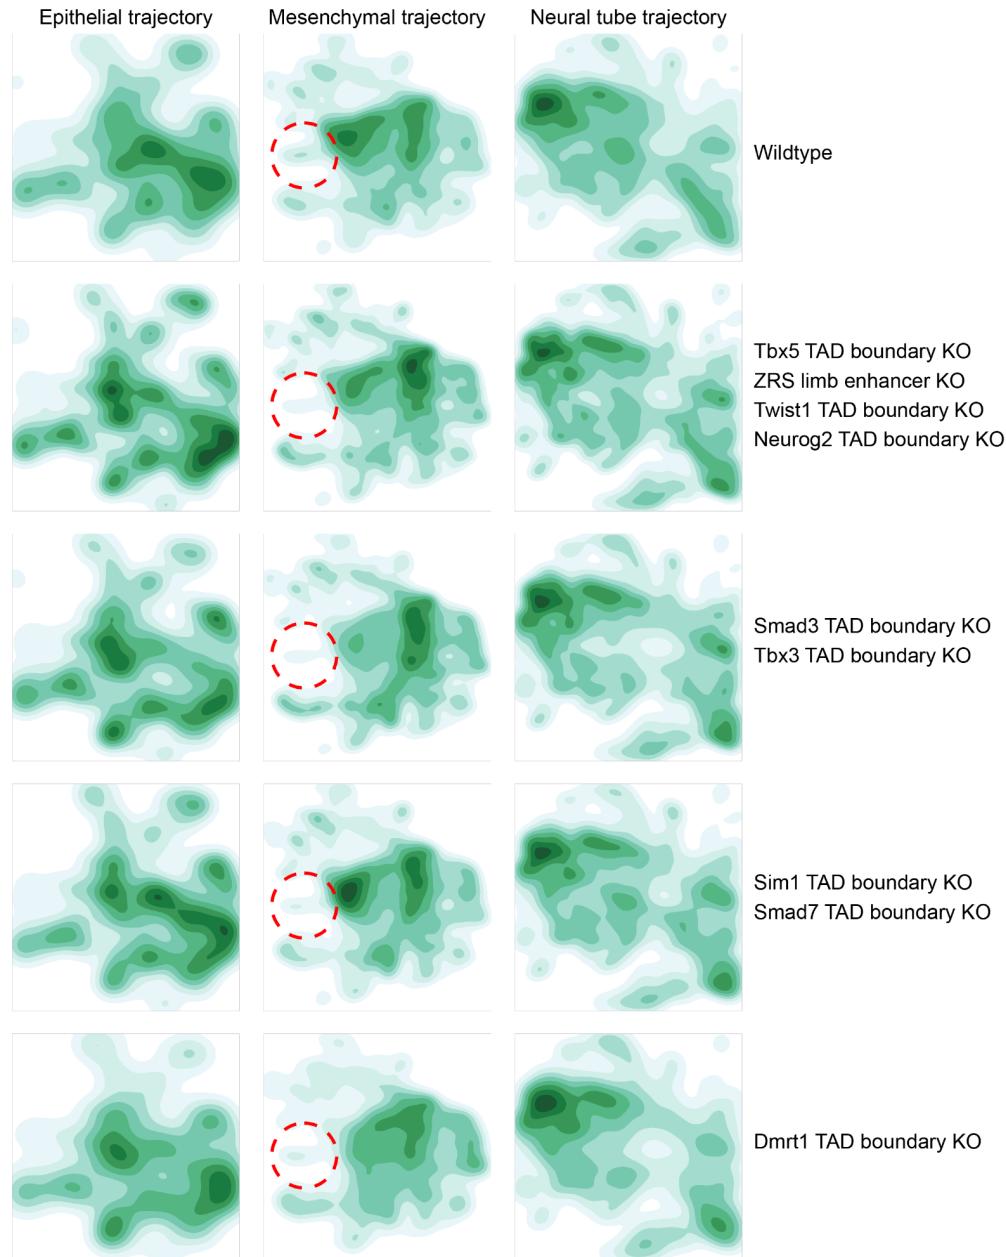

1454  
1455  
1456  
1457  
1458  
1459  
1460  
1461  
1462  
1463

**Supplementary Figure 15. Density plots of the UMAP co-embedding of wildtype and mutant samples from FVB mouse background.** We focus on the epithelial, mesenchymal and neural tube main trajectories, which are the three largest. The same embedding as in Supplementary Fig. 14 was used. Mutants with visually similar UMAP embeddings were combined for presentation. The densities are corrected for the total number of cells. The colour scale is kept consistent across mutants (rows), but varied across the trajectories (columns). Dotted circles demarcate the location of cellular accumulation in *Sox9* regulatory INV mutant in the same embedding across all the other mutants.

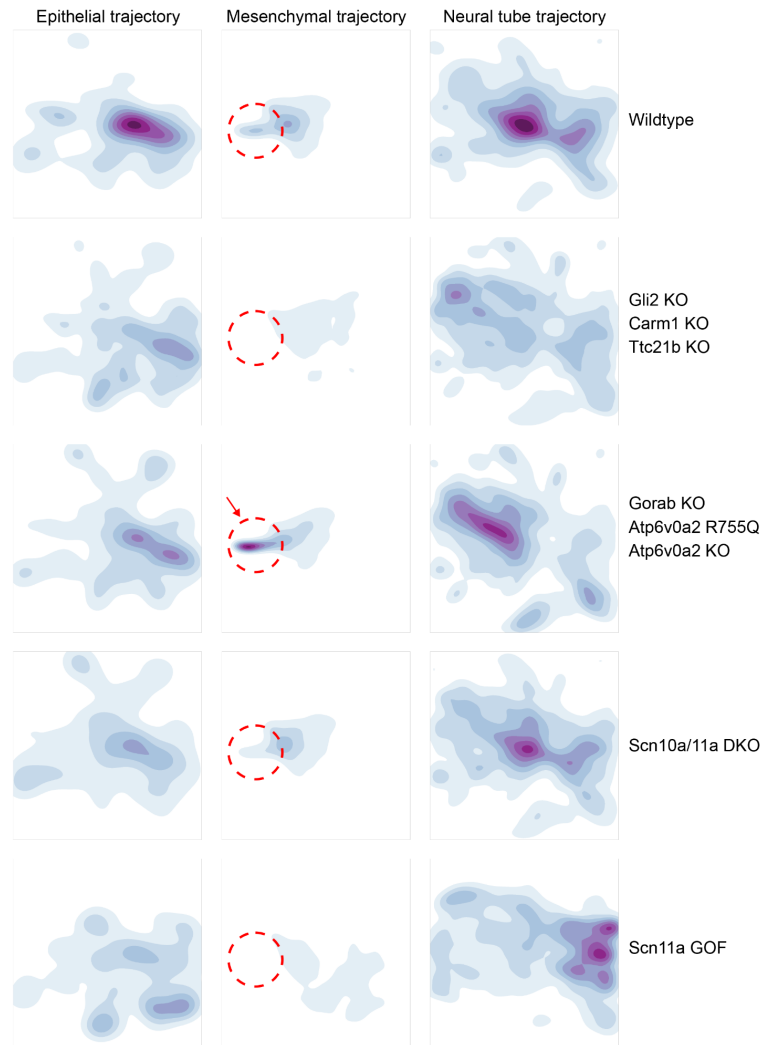

1464  
1465  
1466  
1467  
1468  
1469  
1470  
1471  
1472  
1473  
1474

**Supplementary Figure 16. Density plots of the UMAP co-embedding of wildtype and mutant samples from C57BL/6 mouse background.** We focus on the epithelial, mesenchymal and neural tube main trajectories, which are the three largest. The same embedding as in Supplementary Fig. 14 was used. Mutants with visually similar UMAP embeddings were combined for presentation. The densities are corrected for the total number of cells. The colour scale is kept consistent across mutants (rows), but varied across the trajectories (columns). Dotted circles demarcate the location of cellular accumulation in *Sox9* regulatory INV mutant in the same embedding across all the other mutants. Arrow highlights a similar accumulation of cells in the *Gorab* KO, *Atp6v0a2* R755Q, and *Atp6v0a2*KO mutants.

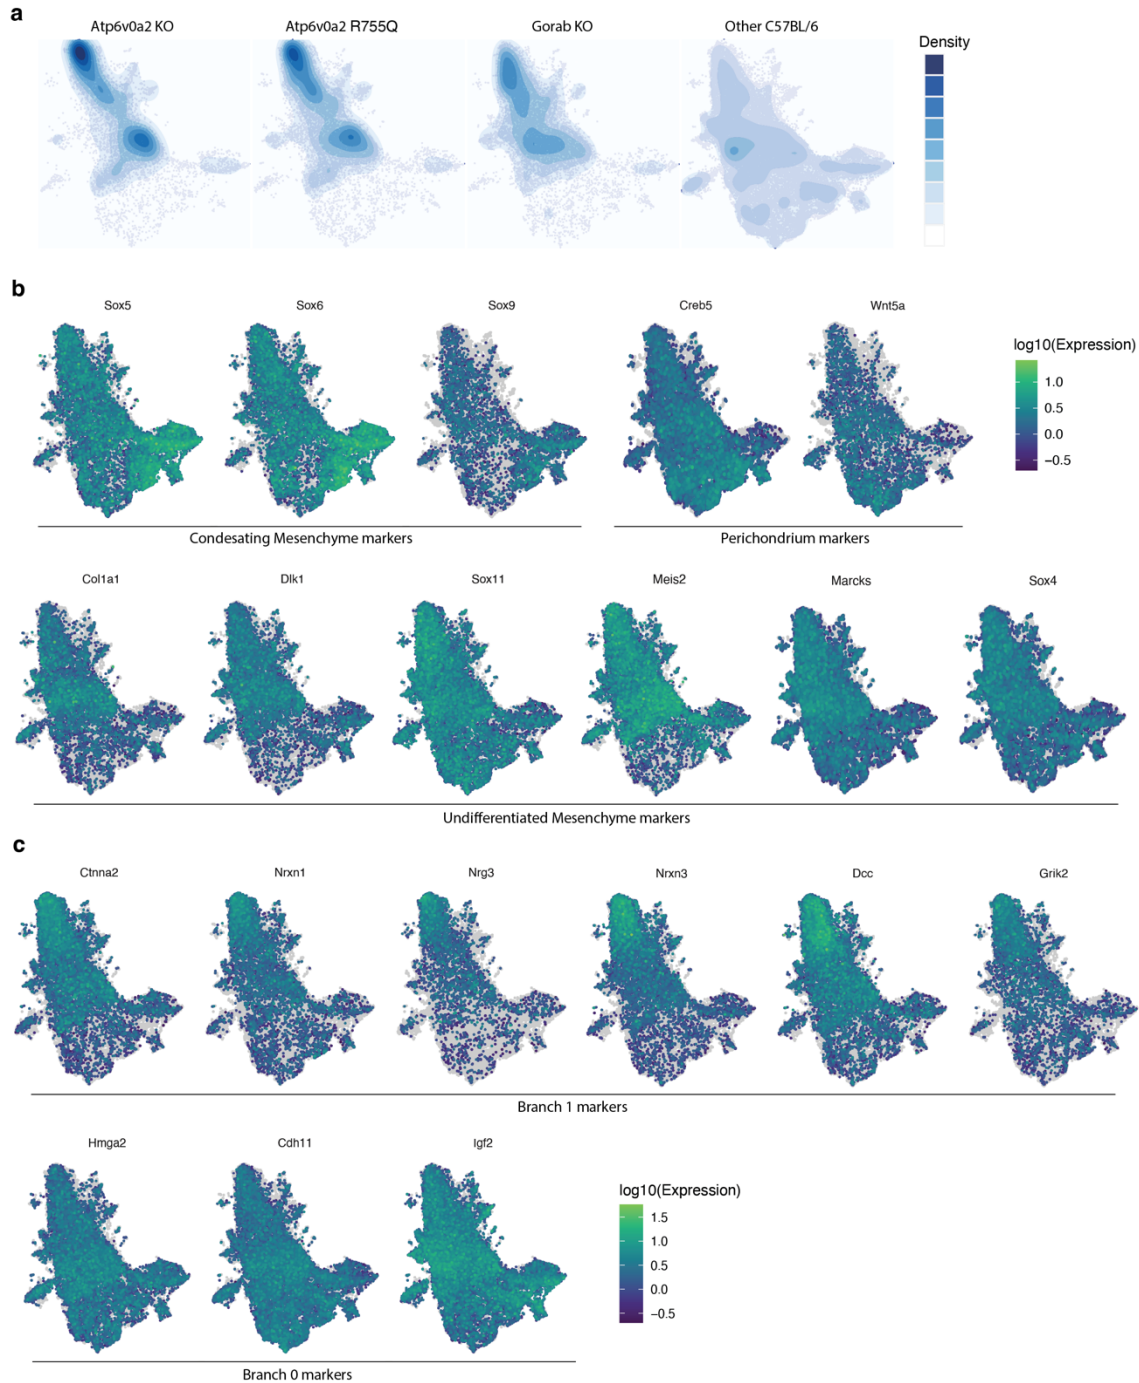

1475  
1476

1477 **Supplementary Figure 17. Density and marker gene expression plots of UMAP co-embeddings of**  
1478 **wildtype and mutant samples from C57BL/6 mouse background in the limb mesenchyme trajectory.**  
1479 **a**, UMAPs showing the co-embeddings of the limb mesenchyme trajectory for wildtype and mutant  
1480 genotypes from the C57BL/6 background strain, with cell density and distributions overlaid. **b**, same as in  
1481 panel **a**, but colored by expression of limb mesenchyme sub-cluster marker genes. The accumulation of  
1482 cells in the *Gorab* KO, *Atp6v0a2* R755Q, and *Atp6v0a2*KO mutants express markers of undifferentiated  
1483 mesenchyme. **c**, same as in panel **a**, but colored by expression of significantly differentially expressed

1484 genes between the two branches of Sox9 regulatory INV undifferentiated mesenchyme cells as shown in  
1485 Fig. 4g.  
1486
